# Supplementary material for: Gold carbonyl cations and beyond: homoleptic gold(i) complexes with P4 and P4S3 and the half-sandwich cation [Au(C6H6)(CO)]+
Source: Royal Society of Chemistry journal article supplement (doi:10.1039/d4cc01374c), 2024-01-01
Supplement: d4cc01374c1.pdf [file d4cc01374c1.pdf]

Electronic Supporting Information

for

**Gold carbonyl cations and beyond: Synthesis of homoleptic gold(I)  
complexes with P<sub>4</sub> and P<sub>4</sub>S<sub>3</sub> and the half-sandwich cation [Au(C<sub>6</sub>H<sub>6</sub>)(CO)]<sup>+</sup>**

Manuel Schmitt,<sup>a,b</sup> Sarah Nestle,<sup>a</sup> Valentin Radtke,<sup>a</sup> and Ingo Krossing<sup>\*[a]</sup>

<sup>[a]</sup> Dr. M. Schmitt, B.Sc. S. Nestle, Dr. V Radtke, Prof. Dr. I. Krossing, Institut für Anorganische und Analytische Chemie and Freiburger Materialforschungszentrum (FMF), Albert-Ludwigs-Universität Freiburg, Albertstr. 21, 79104 Freiburg, Germany. <sup>[b]</sup> Dr. M. Schmitt, Anorganisch-Chemisches Institut, Universität Heidelberg, Im Neuenheimer Feld 270, 69120 Heidelberg, Germany.

\*Correspondence to [krossing@uni-freiburg.de](mailto:krossing@uni-freiburg.de)

## Table of Content

|                                                                                                                                         |    |
|-----------------------------------------------------------------------------------------------------------------------------------------|----|
| 1. Compounds.....                                                                                                                       | 3  |
| 2. Abbreviations.....                                                                                                                   | 3  |
| 3. Materials and Methods .....                                                                                                          | 4  |
| General Procedures .....                                                                                                                | 4  |
| NMR Spectroscopy .....                                                                                                                  | 4  |
| Vibrational Spectroscopy.....                                                                                                           | 5  |
| Single-Crystal X-ray Diffraction.....                                                                                                   | 5  |
| Powder X-ray Diffraction .....                                                                                                          | 6  |
| Computational Details.....                                                                                                              | 6  |
| 4. Experimental Details.....                                                                                                            | 7  |
| 4.1 Synthesis and NMR Spectra of $[\text{Au}(\text{CO})_2][\text{F}\{\text{Al}(\text{OR}^{\text{F}})_3\}_2]$ 1.....                     | 7  |
| 4.2 Synthesis and NMR Spectra of $[\text{Au}(\text{P}_4)_2][\text{F}\{\text{Al}(\text{OR}^{\text{F}})_3\}_2]$ 2 .....                   | 10 |
| 4.3 Synthesis and NMR Spectra of $[\text{Au}(\text{P}_4\text{S}_3)_2][\text{F}\{\text{Al}(\text{OR}^{\text{F}})_3\}_2]$ 3 .....         | 13 |
| 4.4 Synthesis and NMR Spectra of $[\text{Au}(\text{C}_6\text{H}_6)(\text{CO})][\text{F}\{\text{Al}(\text{OR}^{\text{F}})_3\}_2]$ 4..... | 17 |
| 4.5 Reactions of $[\text{Au}(\text{CO})_2]^+$ with acetylene .....                                                                      | 21 |
| 5. Vibrational Spectra and Analysis .....                                                                                               | 22 |
| 6. Single-Crystal XRD Data .....                                                                                                        | 32 |
| 6.1 Crystal structure of $[\text{Au}(\text{CO})_2][\text{F}\{\text{Al}(\text{OR}^{\text{F}})_3\}_2]$ 1 .....                            | 33 |
| 6.2 Crystal structure of $[\text{Au}(\text{P}_4)_2][\text{F}\{\text{Al}(\text{OR}^{\text{F}})_3\}_2]$ 2.....                            | 34 |
| 6.3 Crystal structure of $[\text{Au}(\text{P}_4\text{S}_3)_2][\text{F}\{\text{Al}(\text{OR}^{\text{F}})_3\}_2]$ 3.....                  | 36 |
| 6.4 Crystal structure of $[\text{Au}(\text{C}_6\text{H}_6)(\text{CO})][\text{F}\{\text{Al}(\text{OR}^{\text{F}})_3\}_2]$ 4 .....        | 38 |
| 7. Cyclic Voltammetry.....                                                                                                              | 39 |
| 8. Powder XRD Data.....                                                                                                                 | 41 |
| 9. Quantum-Chemical Calculations .....                                                                                                  | 43 |
| Coordinates of the calculations at the r2scan-3c level of theory inAngstrom .....                                                       | 48 |
| Coordinates and frequencies of the calculations at the B3LYP(D3BJ)/def2-TZVPP of theory.....                                            | 50 |
| 10. References .....                                                                                                                    | 81 |

## 1. Compounds

- 1  $[\text{Au}(\text{CO})_2][\text{F}\{\text{Al}(\text{OC}(\text{CF}_3)_3)_3\}_2]$
- 2  $[\text{Au}(\text{P}_4)_2][\text{F}\{\text{Al}(\text{OC}(\text{CF}_3)_3)_3\}_2]$
- 3  $[\text{Au}(\text{P}_4\text{S}_3)_2][\text{F}\{\text{Al}(\text{OC}(\text{CF}_3)_3)_3\}_2]$
- 4  $[\text{Au}(\text{C}_6\text{H}_6)(\text{CO})][\text{F}\{\text{Al}(\text{OC}(\text{CF}_3)_3)_3\}_2]$

## 2. Abbreviations

4FB = 1,2,3,4-tetrafluorobenzene

5FB = pentafluorobenzene

*o*-dfb = *ortho*-difluorobenzene

$\text{OR}^{\text{F}} = \text{OC}(\text{CF}_3)_3$

$[\text{Al}(\text{OR}^{\text{F}})_4]^- = [\text{Al}\{\text{OC}(\text{CF}_3)_3\}_4]^-$

$[\text{F}\{\text{Al}(\text{OR}^{\text{F}})_3\}_2]^- = [(\{\text{CF}_3\}_3\text{CO})_3\text{Al-F-Al}\{\text{OC}(\text{CF}_3)_3\}_3]^-$

FWHM = full width half maximum

Mes = mesitylene, 1,3,5-Trimethylbenzene

NMR = nuclear magnetic resonance

RT = room temperature

XRD = X-ray diffraction

Fc = ferrocene, bis( $\eta^5$ -cyclopentadienyl)iron

TMS = tetramethylsilane

DFT = density functional theory

### 3. Materials and Methods

#### General Procedures

All reactions were performed under exclusion of moisture and air through usage of a nitrogen filled glovebox ( $O_2/H_2O < 1$  ppm) and standard Schlenk technique. Special double-Schlenk tubes were used for all reactions, consisting of two Schlenk tubes connected by a G3 or G4 frit and equipped with grease-free PTFE or glass valves. Benzene, 1,2,3,4-tetrafluorobenzene (4FB, Fluorochem) and *ortho*-difluorobenzene (*o*-dfb, Apollo Scientific) were dried over  $CaH_2$  and distilled. 4FB is usually contaminated with traces of less fluorinated benzenes. To remove these impurities, 4FB was stirred over  $Ag[Al(OR^F)_4]$  at room temperature and condensed into a storage vessel. This procedure leads to the contamination of 4FB with traces of  $HOC(CF_3)_3$  ( $< 1\%$ ). However, we could not observe an influence on the reactions by this impurity. Pentane was dried with a Grubbs apparatus (MBraun). Oxygen was removed from all solvents by purging with nitrogen and all solvents were stored over activated 3 Å molecular sieves.  $I_2$  and  $P_4$  were sublimated prior to use.  $P_4S_3$  was purified by extraction with  $CS_2$ . Gold powder (Alfa Aeser, 99.96% metals basis, 0.5-0.8 micron) was used without further purification.  $Ag[Al(OR^F)_4]^1$  and  $Ag[F\{Al(OR^F)_3\}_2]^2$  were synthesized according to literature.

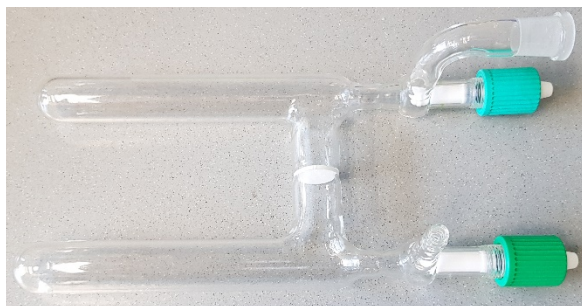

**Figure S 1:** Typical double-Schlenk tube which was used for all reactions.

#### NMR Spectroscopy

NMR spectroscopy was performed at RT either on a Bruker Avance II Widebore 400 MHz or a Bruker Avance III HD 300 MHz. The compounds were dissolved in a 5 mm thick-walled NMR tube with J. Young PTFE valve. The spectra were calibrated by using the  $^1H$  signal of the solvent (4FB:  $\delta = 6.97$  ppm, rel. to TMS). The field corrections of other nuclei were adjusted accordingly. The Bruker Topspin software package (version 3.5 or 4.1.1) was used for measuring, processing, and creation of the graphical representations of the spectra.  $^1H$  and  $^{13}C\{^1H\}$  NMR spectra are referenced against TMS,  $^{19}F$  NMR spectra

against  $\text{CFCl}_3$ ,  $^{27}\text{Al}$  NMR spectra against an aqueous solution of  $\text{Al}(\text{NO}_3)_3$  (1.1 mM), and  $^{31}\text{P}$  NMR spectra against an aqueous solution of  $\text{H}_3\text{PO}_4$  (85%).

### **Vibrational Spectroscopy**

FTIR spectra were measured with a Bruker ALPHA with a ZnSe or diamond ATR unit inside a glovebox. The spectra were recorded in the range of 4000 to 550  $\text{cm}^{-1}$  (ZnSe) or 4000 to 375 (diamond) with 64 scans and a resolution of 2  $\text{cm}^{-1}$  at RT. Data processing was performed with the Bruker OPUS 7.5 software package and, if not stated otherwise, a baseline correction with 3 iterations was carried out. Raman spectra were recorded on a VERTEX 70 equipped with a Bruker RAM II Modul (1064 nm exciting line of a Nd-YAG laser) and liquid nitrogen cooled Ge detector. The samples were flame-sealed in soda-lime glass Pasteur pipettes. The spectra were measured at RT in the range of 4000-80  $\text{cm}^{-1}$  with a resolution of 4  $\text{cm}^{-1}$ . The data were processed with the Bruker OPUS 7.5 software package and, if not stated otherwise, a baseline correction with 5 iterations was performed. All IR and Raman spectra were normalized to 1 and the intensities are reported as follows:  $\geq 0.8$  = very strong (vs),  $\geq 0.6$  = strong (s),  $\geq 0.4$  = medium (m),  $\geq 0.2$  = weak (w),  $< 0.2$  = very weak (vw). The graphical representations were created with Origin 2021.

### **Single-Crystal X-ray Diffraction**

Single-crystal X-ray diffraction was performed on a Bruker D8 VENTURE dual wavelength Mo/Cu three-circle diffractometer equipped with microfocus sealed X-ray tubes using mirror optics as monochromator and a Bruker PHOTON III detector. Single crystals were selected under perfluoropolyalkylether oil (AB128330, ABCR GmbH & Co. KG), mounted on CryoLoops with a diameter of 0.1 to 0.2 mm and shock-cooled using an Oxford Cryostream 800 low temperature device. The data were gathered with Mo  $K_\alpha$  radiation ( $\lambda = 0.71073 \text{ \AA}$ ) at 100(2) K. The data were integrated with SAINT<sup>3</sup> (version 8.40B) and a multi-scan absorption correction using SADABS<sup>4</sup> was applied. The structures were solved by direct methods using SHELXT<sup>5</sup> and refined by full-matrix least-squares methods against  $F^2$  by SHELXL<sup>6</sup> using the GUI software ShelXle.<sup>7</sup> Disordered moieties were refined using bond lengths restraints and displacement parameter restraints and were modeled with the program DSR.<sup>8,9</sup> The data were finalized with the tool FinalCif.<sup>10</sup> The graphical representations of the crystal structures were generated with OLEX2.<sup>11</sup> Crystallographic data for the structures reported here have been deposited with the Cambridge Crystallographic Data Centre<sup>12</sup> Copies of the data can be obtained free of charge from the Cambridge Crystallographic Data Centre via [www.ccdc.cam.ac.uk/structures](http://www.ccdc.cam.ac.uk/structures).

### **Powder X-ray Diffraction**

Powder diffractograms were measured on a STOE STADI P powder diffractometer equipped with a Ge-(111) monochromator and Mythen 1K detector using Mo K<sub>α1</sub> radiation ( $\lambda = 0.709300 \text{ \AA}$ ). The samples were transferred into a 0.5 mm thick capillary (Hilgenberg GmbH, wall thickness 0.01 mm) and the capillary was sealed with silicon grease. The samples were cooled to 100(10) K with an Oxford Cryostream low temperature device. Data acquisition, processing, and the calculation of powder diffractograms from single-crystal data was performed using the STOE WinXPOW<sup>®</sup> package.

### **Computational Details**

Geometry optimizations with the B3LYP functional,<sup>13–15</sup> were performed with the Turbomole software (v7.2, v7.5 or v7.5.1).<sup>16,17</sup> Here, the basis set def2-TZVPP,<sup>18</sup> the resolution-of-identity (RI) approximation,<sup>19–21</sup> dispersion correction (D3BJ),<sup>22,23</sup> a fine integration grid (m4 or m5) and the default SCF convergence criteria ( $10^{-7}$  H) were used. Thermal and entropic contributions to the Gibbs free energy were calculated without scaling factor at standard conditions (298.15 K, 0.1 MPa) with the *FREEH* module. The integrated *EGRAD*<sup>24</sup> module was used to calculate Raman scattering cross sections. IR and Raman spectra were simulated without scaling factor and a FWHM of  $10 \text{ cm}^{-1}$ .

Geometry optimizations and single point calculations at the r2scan-3c and DLPNO-CCSD(T) level of theory were performed with ORCA (v5.0.4).<sup>25–27</sup> For the DLPNO-CCSD(T) calculations, the def2-QZVPP basis set,<sup>28</sup> tight convergence criteria (tightscf) and normal DLPNO thresholds were used.

## 4. Experimental Details

### 4.1 Synthesis and NMR Spectra of $[\text{Au}(\text{CO})_2][\text{F}\{\text{Al}(\text{OR}^{\text{F}})_3\}_2] \mathbf{1}$

$\text{Ag}[\text{F}\{\text{Al}(\text{OR}^{\text{F}})_3\}_2]$  (399.6 mg, 0.2512 mmol), Au powder (69.5 mg, 0.353 mmol, 1.4 eq) and  $\text{I}_2$  (31.5 mg, 0.124 mg, 0.5 eq.) were weighed in one side of a double-Schlenk tube and 4FB (4 mL) was added. The solution was frozen with liquid nitrogen, the system evacuated, and the tube was flooded with CO (3 bar). The mixture was stirred at RT for 18 h and a suspension of an off-white solid in a yellow solution was obtained. The solution was filtered through the frit to the other side of the double-Schlenk tube. The CO atmosphere was removed, and *n*-pentane (ca. 25 mL) was added to the off-white solid. Crystallization by vapor diffusion of *n*-pentane into the yellow solution at RT yielded colorless crystals of **1** (Yield: 303.8 mg, 0.1750 mmol, 70%).

**FTIR** (ZnSe, ATR):  $\tilde{\nu}/\text{cm}^{-1}$  = 2219 (vw), 1354 (vw), 1301 (w), 1266 (s), 1247 (vs), 1215 (vs), 1178(w), 971 (vs), 862 (vw), 760 (vw), 727 (vs), 639 (w), 568 (w).

**FT Raman:** Could not be obtained due to a very intense fluorescence background, which may be caused by very small quantities of elemental gold.

**$^1\text{H}$  NMR** (300.18 MHz, 4FB, RT): *only solvent signal at 6.97 ppm.*

**$^{13}\text{C}\{^1\text{H}\}$  NMR** (75.48 MHz, 4FB, RT):  $\delta$  = 173.8 (*minor unknown impurity*), 120.8 (q,  $^1J(\text{C},\text{F}) = 292$  Hz, 18C,  $[\text{F}\{\text{Al}(\text{OC}(\text{CF}_3)_3)_3\}_2]^-$ ), 85.9 (*minor unknown impurity*), 78.7 (m, 6C,  $[\text{F}\{\text{Al}(\text{OC}(\text{CF}_3)_3)_3\}_2]^-$ ) ppm.

No signal of the carbonyl ligands of **1** were observed in the  $^{13}\text{C}$  NMR, which might be caused by dynamic exchange processes. The signal at 173.8 was also observed in the  $^{13}\text{C}$  NMR of **4** with similar intensity compared to the solvent, which justifies the assignment as an impurity.

**$^{19}\text{F}$  NMR** (282.45 MHz, 4FB, RT):  $\delta$  = -76.2 (s, 54F,  $[\text{F}\{\text{Al}(\text{OC}(\text{CF}_3)_3)_3\}_2]^-$ ), -184.8 (br. s, 1F,  $[\text{F}\{\text{Al}(\text{OC}(\text{CF}_3)_3)_3\}_2]^-$ ) ppm.

**$^{27}\text{Al}$  NMR** (78.22 MHz, 4FB, RT): *The signal of the anion is too broad to be visible.*

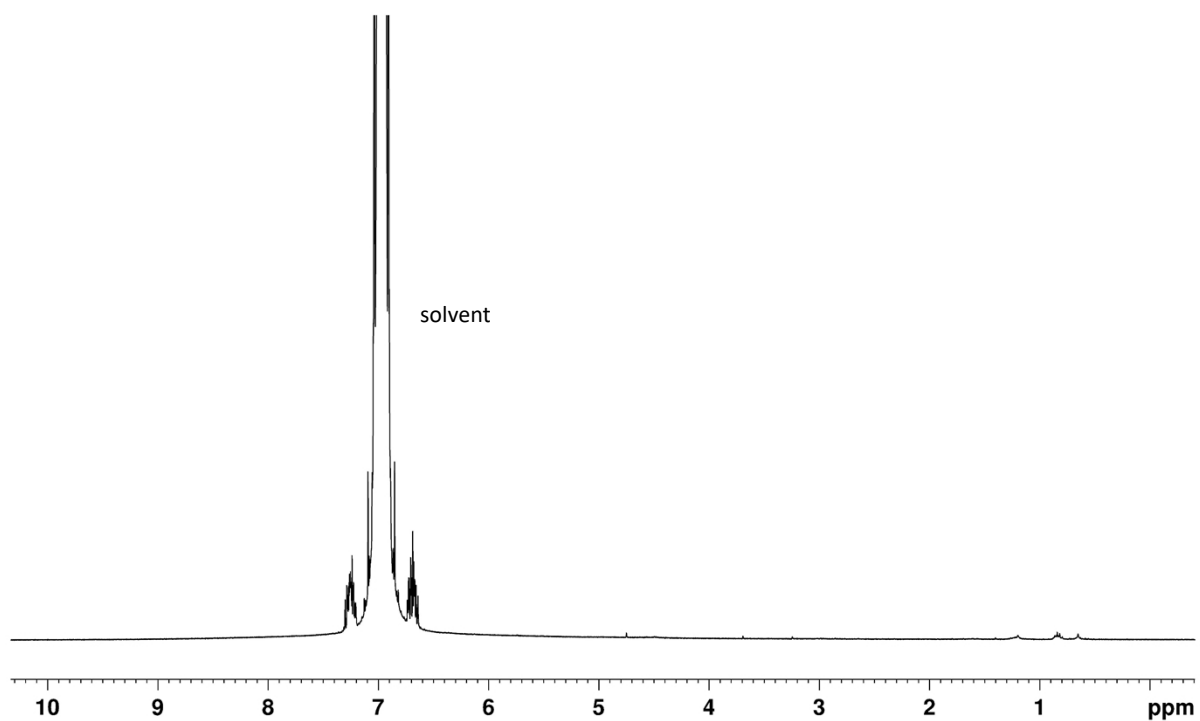

Figure S 2:  $^1\text{H}$  NMR (300.18 MHz, 4FB, RT) spectrum of **1**.

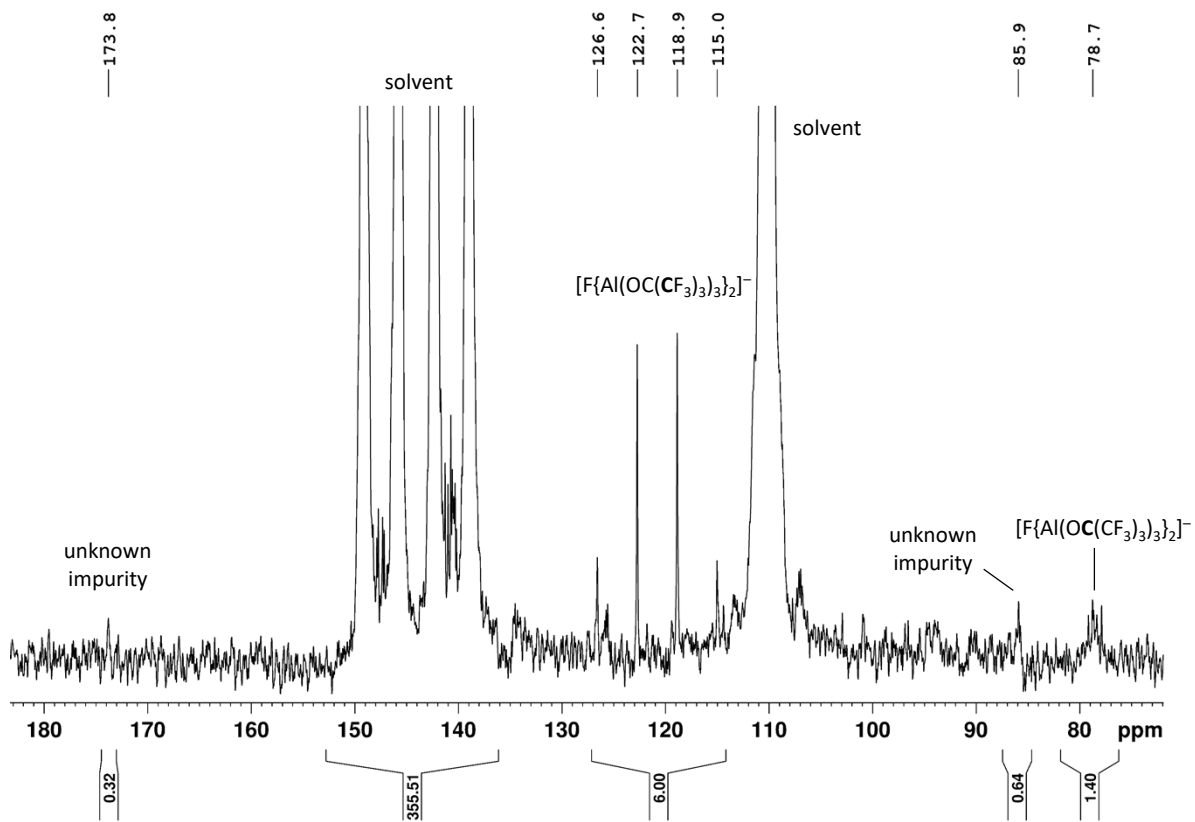

Figure S 3:  $^{13}\text{C}\{^1\text{H}\}$  NMR (75.48 MHz, 4FB, RT) spectrum of **1**.



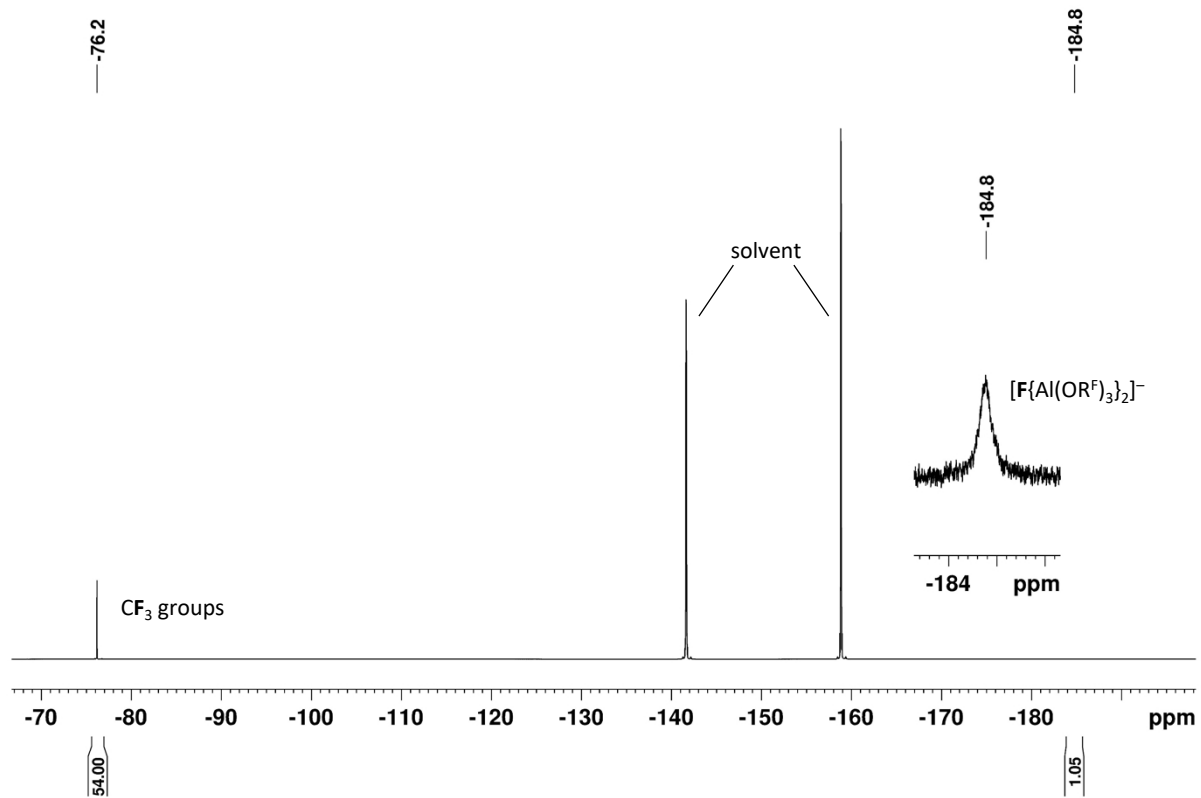

Figure S 4:  $^{19}F$  NMR (282.45 MHz, 4FB, RT) spectrum of 1.

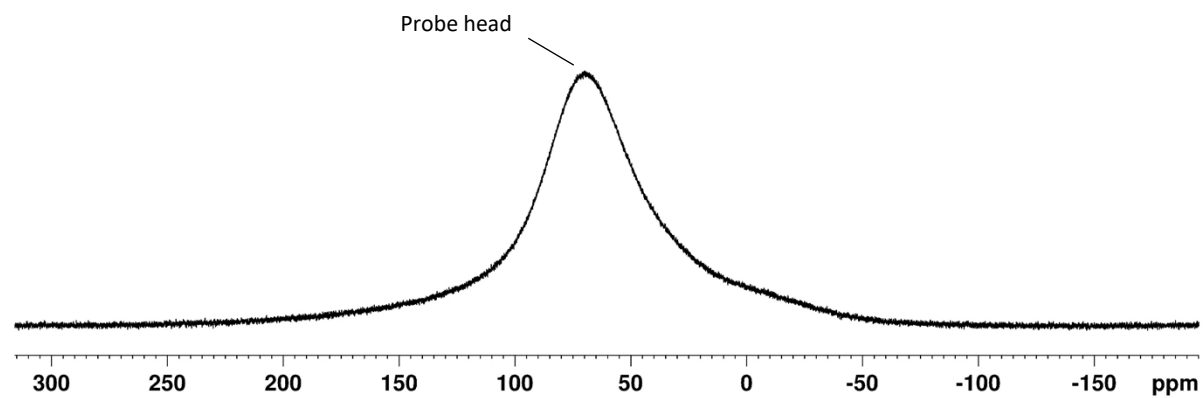

Figure S 5:  $^{27}Al$  NMR (78.22 MHz, 4FB, RT) spectrum of 1.

## 4.2 Synthesis and NMR Spectra of $[\text{Au}(\text{P}_4)_2][\text{F}\{\text{Al}(\text{OR}^{\text{F}})_3\}_2]$ **2**

Inside a glovebox,  $[\text{Au}(\text{CO})_2][\text{F}\{\text{Al}(\text{OR}^{\text{F}})_3\}_2]$  (148.3 mg, 0.08542 mmol) and  $\text{P}_4$  (22.3 mg, 0.180 mmol, 2.1 eq.) were transferred into one side of a double-Schlenk tube and dissolved in 4FB (2.4 mL). The mixture was stirred for 2 h at RT and a brown solution and some dark precipitate was obtained. The solution was filtered, and *n*-pentane (ca. 25 mL) was added to the empty side of the double-Schlenk tube. Crystallization by vapor diffusion of *n*-pentane into the brown solution at RT yielded colorless crystals of **2** (Yield: 112.3 mg, 0.05825 mmol, 68%).

**FTIR** (Diamond, ATR):  $\tilde{\nu}/\text{cm}^{-1}$  = 1355 (vw), 1300 (w), 1274 (m), 1266 (m), 1238 (vs), 1211 (vs), 1179 (m), 970 (vs), 863 (w), 760 (vw), 726 (vs), 642 (w), 568 (vw), 537 (w), 449 (w).

**FT Raman** (3000 scans, 25 mW):  $\tilde{\nu}/\text{cm}^{-1}$  = 817 (vw), 753 (w), 593 (vs), 570 (vw), 539 (vw), 467 (w), 392 (w), 382 (w), 325 (w), 91 (w).

**$^1\text{H}$  NMR** (300.18 MHz, 4FB, RT): *only solvent signal at 6.97 ppm and some very minor impurities.*

**$^{19}\text{F}$  NMR** (282.45 MHz, 4FB, RT):  $\delta$  = -76.1 (*minor unknown impurity*), -76.2 (s, 54F,  $[\text{F}\{\text{Al}(\text{OC}(\text{CF}_3)_3\}_3)_2]^-$ ), -184.8 (br. s, 1F,  $[\text{F}\{\text{Al}(\text{OC}(\text{CF}_3)_3\}_3)_2]^-$ ) ppm.

**$^{27}\text{Al}$  NMR** (78.22 MHz, 4FB, RT):  $\delta$  = 39.8 (br. s, 1Al,  $[\text{F}\{\text{Al}(\text{OC}(\text{CF}_3)_3\}_3)_2]^-$ ) ppm.

**$^{31}\text{P}$  NMR** (121.52 MHz, 4FB, RT):  $\delta$  = -458.1 (s, 8 P,  $[\text{Au}(\text{P}_4)_2]^+$ ) ppm.

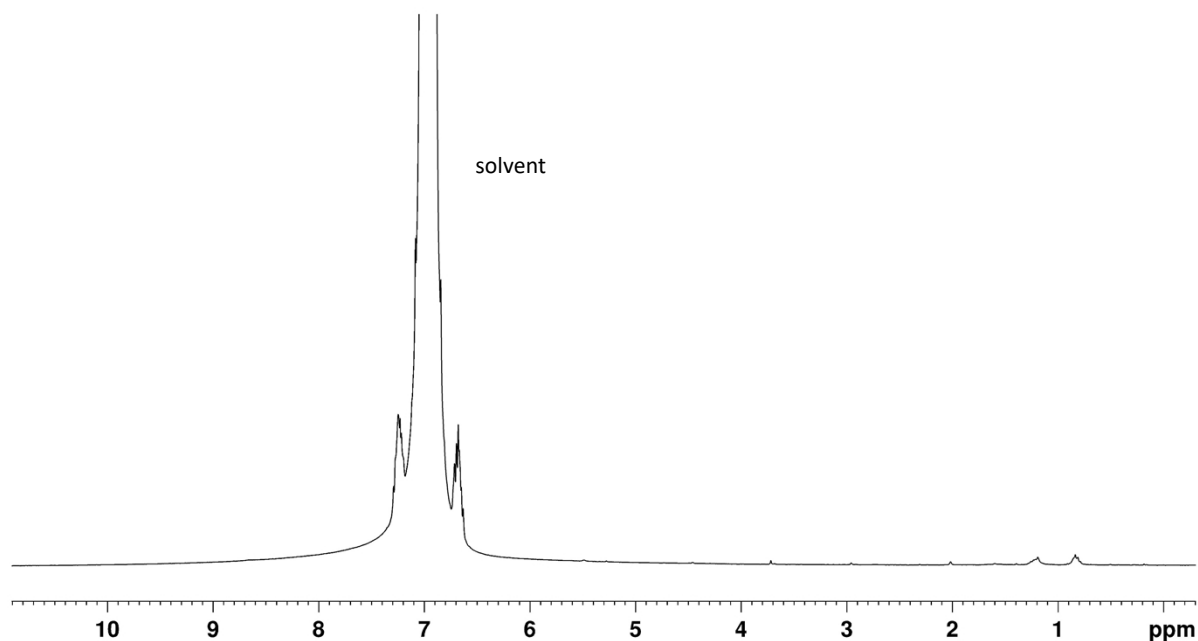

**Figure S 6:**  $^1\text{H}$  NMR (300.18 MHz, 4FB, RT) spectrum of **2**.

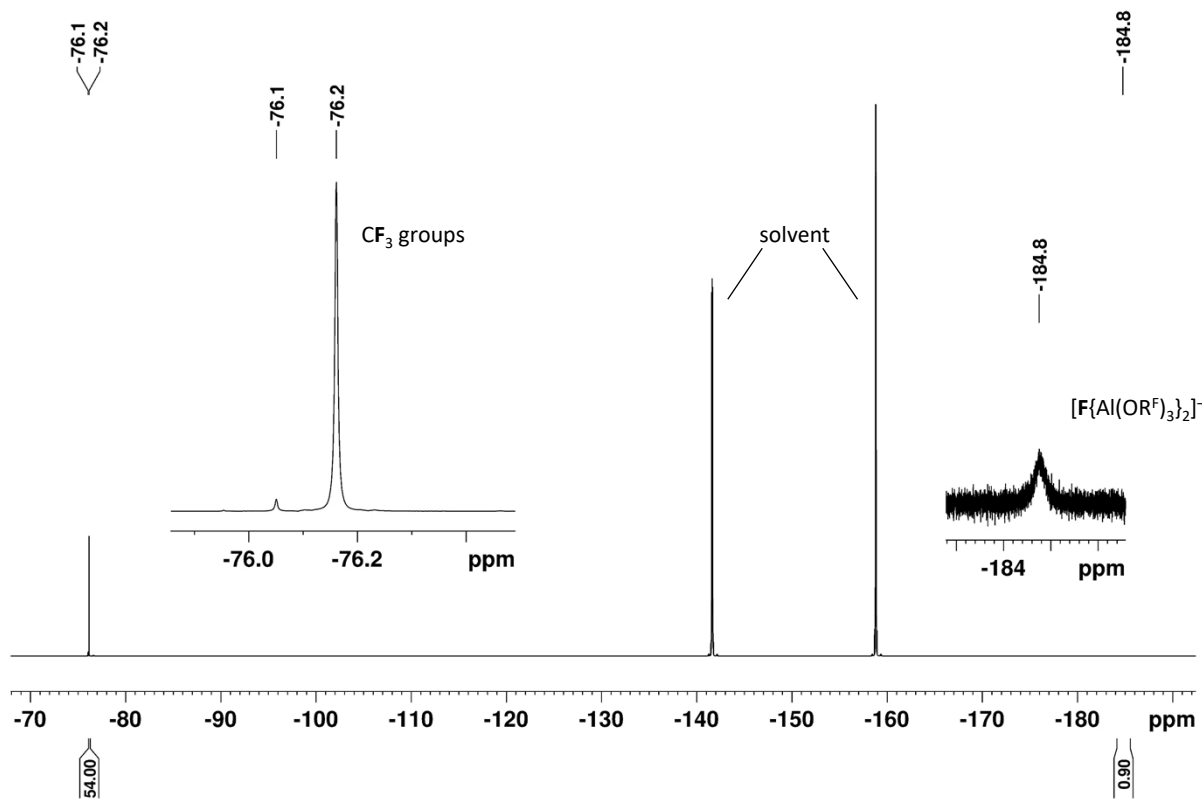

Figure S 7: <sup>19</sup>F NMR (282.45 MHz, 4FB, RT) spectrum of 2.

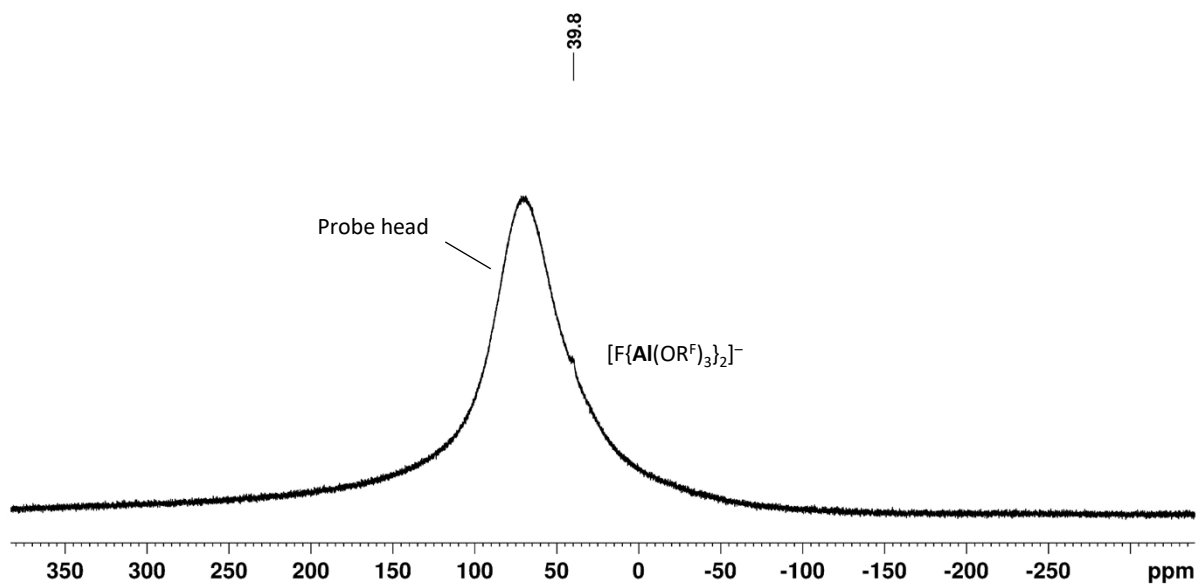

Figure S 8: <sup>27</sup>Al NMR (78.22 MHz, 4FB, RT) spectrum of 2.

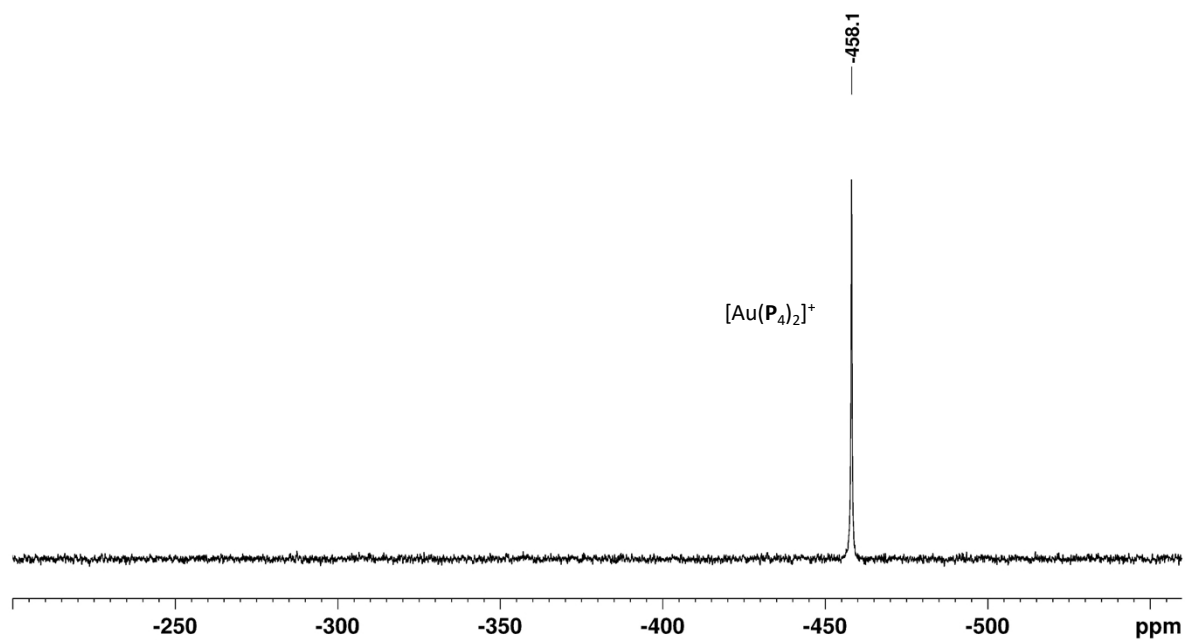

Figure S 9:  $^{31}\text{P}$  NMR (121.52 MHz, 4FB, RT) spectrum of **2**.

### 4.3 Synthesis and NMR Spectra of $[\text{Au}(\text{P}_4\text{S}_3)_2][\text{F}\{\text{Al}(\text{OR}^{\text{F}})_3\}_2] \mathbf{3}$

Inside a glovebox,  $[\text{Au}(\text{CO})_2][\text{F}\{\text{Al}(\text{OR}^{\text{F}})_3\}_2]$  (199.6 mg, 0.1150 mmol) and  $\text{P}_4\text{S}_3$  (56.2 mg, 0.255 mmol, 2.1 eq.) were transferred into one side of a double-Schlenk tube and dissolved in 4FB (2.4 mL). The mixture was stirred for 1 h at RT and a suspension of a dark precipitate in an orange solution was obtained. The solution was filtered and *n*-pentane (ca. 25 mL) was added to the empty side of the double-Schlenk tube. Crystallization by vapor diffusion of *n*-pentane into the orange solution at RT yielded colorless crystals of **3** (Yield: 128.6 mg, 0.06065 mmol, 61%).

**FTIR** (Diamond, ATR):  $\tilde{\nu}/\text{cm}^{-1} = 1354$  (vw), 1299 (w), 1276 (m), 1238 (vs), 1213 (vs), 1171 (m), 1163 (m), 972 (vs), 864 (w), 759 (vw), 726 (vs), 635 (w), 568 (w), 536 (w), 527 (vw), 521 (vw), 500 (vw), 477 (vw), 471 (vw), 449 (m), 437 (m), 427 (vw), 383 (vw).

**FT Raman** (5,000 scans, 20 mW):  $\tilde{\nu}/\text{cm}^{-1} = 1495$  (vw), 1279 (vw), 816 (vw), 753 (m), 569 (vw), 538 (w), 523 (s), 485 (s), 439 (m), 427 (vw), 427 (vw), 394 (s), 370 (vw), 340 (s), 324 (w), 286 (vs), 223 (m), 171 (vw), 107 (vs).

**$^1\text{H}$  NMR** (300.18 MHz, 4FB, RT): *only solvent signal at 6.97 and some very minor impurities.*

**$^{13}\text{C}\{^1\text{H}\}$  NMR** (75.48 MHz,  $\text{F}_4\text{C}_6\text{H}_2$ , RT):  $\delta = 120.8$  (q,  $^1J(\text{C},\text{F}) = 292$  Hz, 18C,  $[\text{F}\{\text{Al}(\text{OC}(\text{CF}_3)_3)_3\}_2]^-$ ), 78.6 (m, 6C,  $[\text{F}\{\text{Al}(\text{OC}(\text{CF}_3)_3)_3\}_2]^-$ ) ppm.

**$^{19}\text{F}$  NMR** (282.45 MHz, 4FB, RT):  $\delta = -76.1$  (s, 54F,  $[\text{F}\{\text{Al}(\text{OC}(\text{CF}_3)_3)_3\}_2]^-$ ),  $-184.8$  (br. s, 1F,  $[\text{F}\{\text{Al}(\text{OC}(\text{CF}_3)_3)_3\}_2]^-$ ) ppm.

**$^{27}\text{Al}$  NMR** (78.22 MHz,  $\text{F}_4\text{C}_6\text{H}_2$ , RT):  $\delta = 38.5$  (br. s, 1Al,  $[\text{F}\{\text{Al}(\text{OC}(\text{CF}_3)_3)_3\}_2]^-$ ) ppm.

**$^{31}\text{P}$  NMR** (121.52 MHz, 4FB, RT):  $\delta = 80.7$  (q,  $^2J(\text{P},\text{P}) = 61.3$  Hz, 2P,  $[\text{Au}(\text{P}^{\text{a}}\text{S}_3\text{P}^{\text{b}})_2]^+$ ),  $-122.8$  (d,  $^2J(\text{P},\text{P}) = 61.3$  Hz, 6P,  $[\text{Au}(\text{P}^{\text{a}}\text{S}_3\text{P}^{\text{b}})_2]^+$ ) ppm.

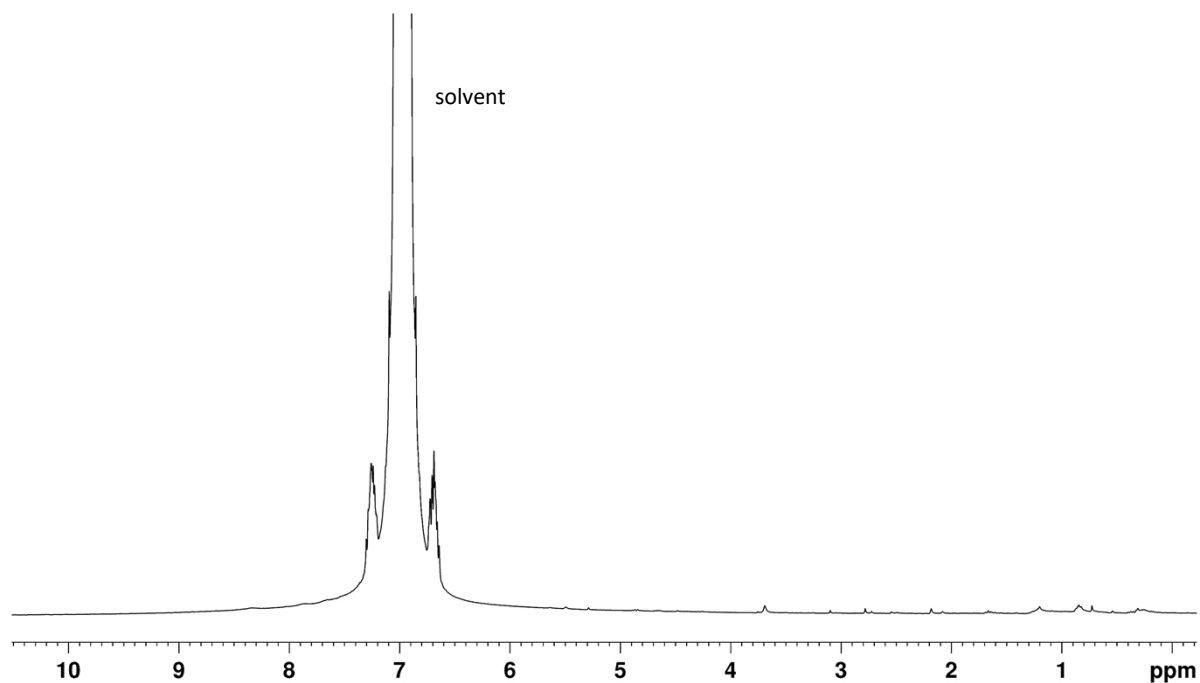

Figure S 10:  $^1\text{H}$  NMR (300.18 MHz,  $\text{F}_4\text{C}_6\text{H}_2$ , RT) spectrum of **3**.

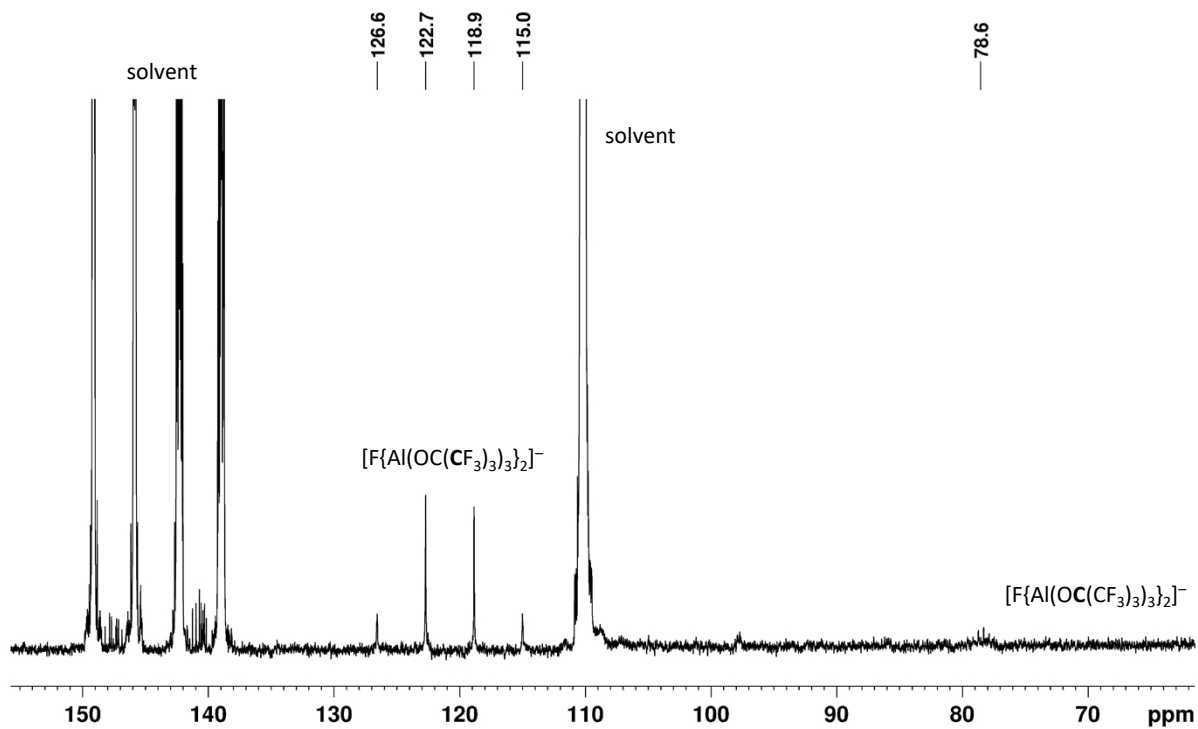

Figure S 11:  $^{13}\text{C}\{^1\text{H}\}$  NMR (75.48 MHz, 4FB, RT) spectrum of **3**.

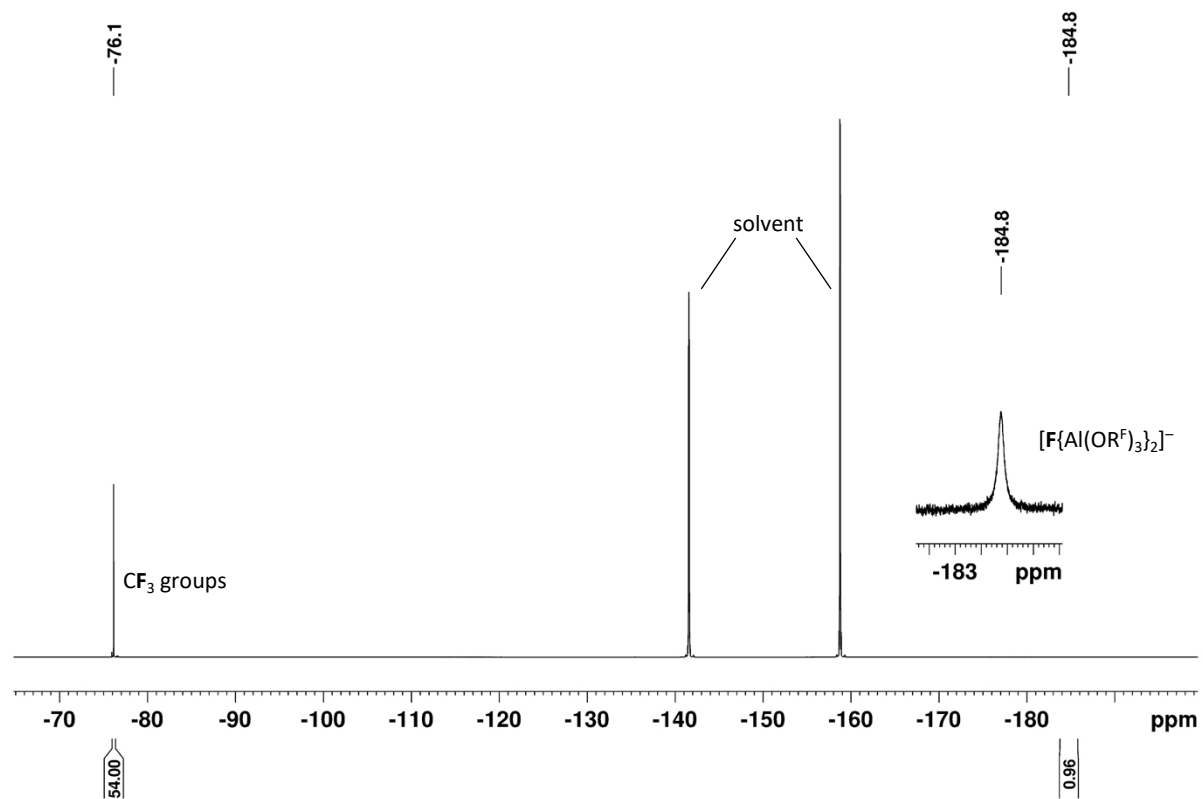

Figure S 12:  $^{19}\text{F}$  NMR (282.45 MHz, 4FB, RT) spectrum of **3**.

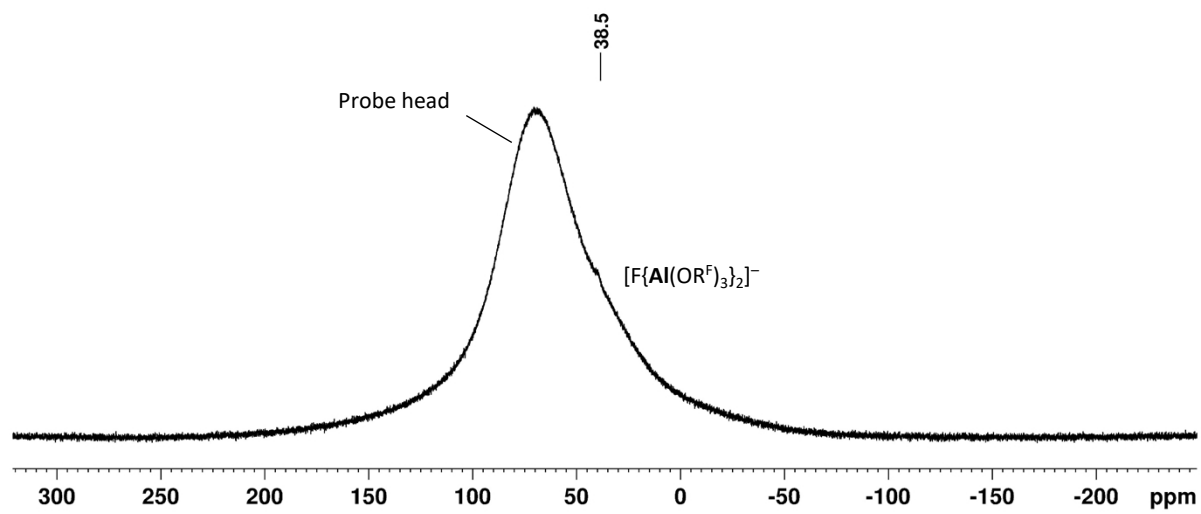

Figure S 13:  $^{27}\text{Al}$  NMR (78.22 MHz, 4FB, RT) spectrum of **3**.

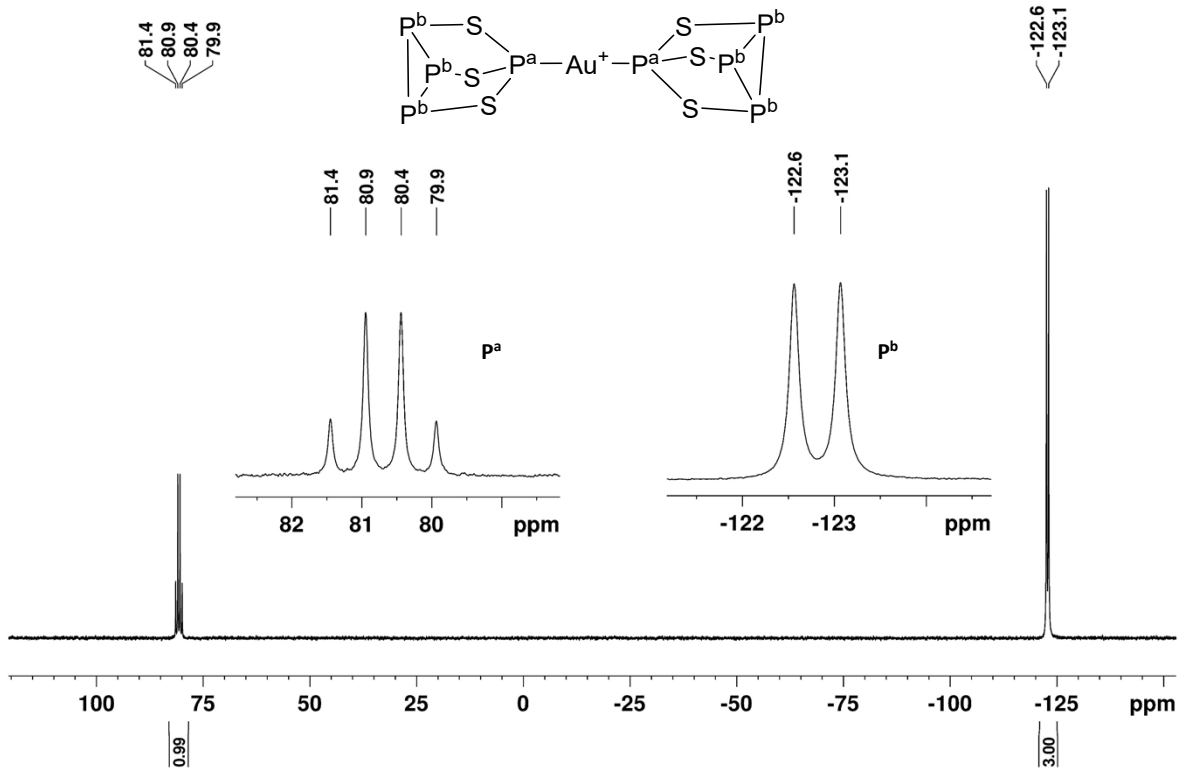

Figure S 14:  $^{31}\text{P}$  NMR (121.52 MHz, 4FB, RT) spectrum of 3.



#### 4.4 Synthesis and NMR Spectra of $[\text{Au}(\text{C}_6\text{H}_6)(\text{CO})][\text{F}\{\text{Al}(\text{OR}^{\text{F}})_3\}_2]$ **4**

A solution of  $[\text{Au}(\text{CO})_2][\text{F}\{\text{Al}(\text{OR}^{\text{F}})_3\}_2]$  (73.9 mg, 0.0426 mmol) in 4FB (2 mL) was prepared and cooled to  $-35\text{ }^\circ\text{C}$ . A solution of benzene (0.09 mL,  $0.48\text{ mol L}^{-1}$ , 3 mg, 0.04 mmol, 1.0 eq.) in 4FB was added to the mixture. The reaction solution was stirred for 20 min at  $-35\text{ }^\circ\text{C}$  and cold *n*-heptane (20 mL) was added to precipitate the product. The solvent was removed, and the product was shortly dried *in vacuo*. The product (18 mg, 0.010 mmol, 23%) was obtained as an off-white solid. Colorless crystals of **3** were obtained by layering of a 4FB solution with hexanes at  $-30\text{ }^\circ\text{C}$ .

**FTIR** (ZnSe, ATR):  $\tilde{\nu}/\text{cm}^{-1} = 2200$  (vw), 1524(vw), 1516(vw), 1474(vw), 1468 (vw), 1355 (vw), 1301 (w), 1278 (m), 1267 (m), 1245 (vs), 1216 (vs), 1180 (w), 975 (vs), 864 (vw), 760 (vw), 728 (vs), 713 (w), 632 (vw), 569 (vw).

**FT Raman**: *Could not be obtained due to the temperature sensitivity of the compound.*

**$^1\text{H}$  NMR** (400.17 MHz, 4FB, 233 K): 8.00 (s, 6H,  $[\text{Au}(\text{C}_6\text{H}_6)(\text{CO})]^+$ ) ppm.

**$^{13}\text{C}\{^1\text{H}\}$  NMR** (100.62 MHz, 4FB, 233 K):  $\delta = 172.1$  (*minor unknown impurity*), 127.6 (s, 6C,  $[\text{Au}(\text{C}_6\text{H}_6)(\text{CO})]^+$ ), 120.7 (q,  $^1J(\text{C},\text{F}) = 292\text{ Hz}$ , 18C,  $[\text{F}\{\text{Al}(\text{OC}(\text{CF}_3)_3)_3\}_2]^-$ ), 78.1 (m, 6C,  $[\text{F}\{\text{Al}(\text{OC}(\text{CF}_3)_3)_3\}_2]^-$ ) ppm.

No signal of the carbonyl ligands of **4** were observed in the  $^{13}\text{C}$  NMR, which might be caused by dynamic exchange processes. The signal at 172.1 was also observed in the  $^{13}\text{C}$  NMR of **1** with similar intensity compared to the solvent, which justifies the assignment as a impurity.

**$^{19}\text{F}$  NMR** (376.54 MHz,  $\text{F}_4\text{C}_6\text{H}_2$ , 233 K):  $\delta = -76.6$  (s, 54F,  $[\text{F}\{\text{Al}(\text{OC}(\text{CF}_3)_3)_3\}_2]^-$ ),  $-184.9$  (br. s, 1F,  $[\text{F}\{\text{Al}(\text{OC}(\text{CF}_3)_3)_3\}_2]^-$ ) ppm.

**$^{27}\text{Al}$  NMR** (104.27 MHz, 4FB, 233 K): *The signal of the anion was too broad to be visible.*

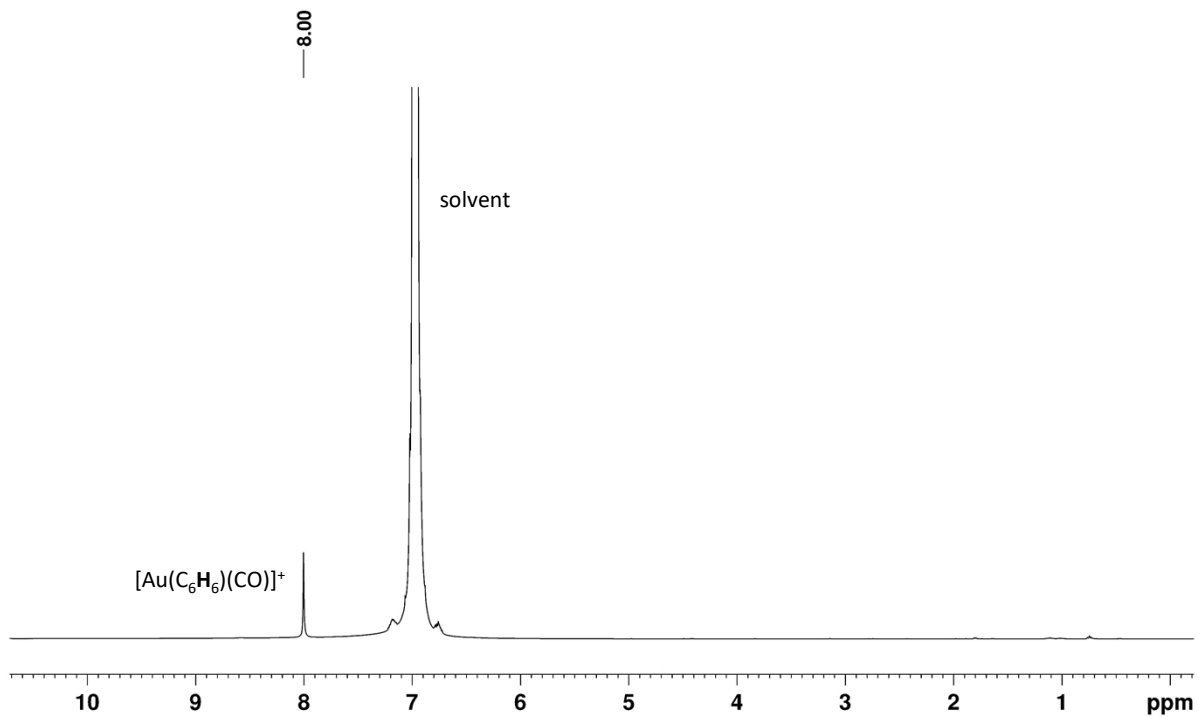

Figure S 15:  $^1\text{H}$  NMR (400.17 MHz,  $\text{F}_4\text{C}_6\text{H}_2$ , 233 K) spectrum of **4**.

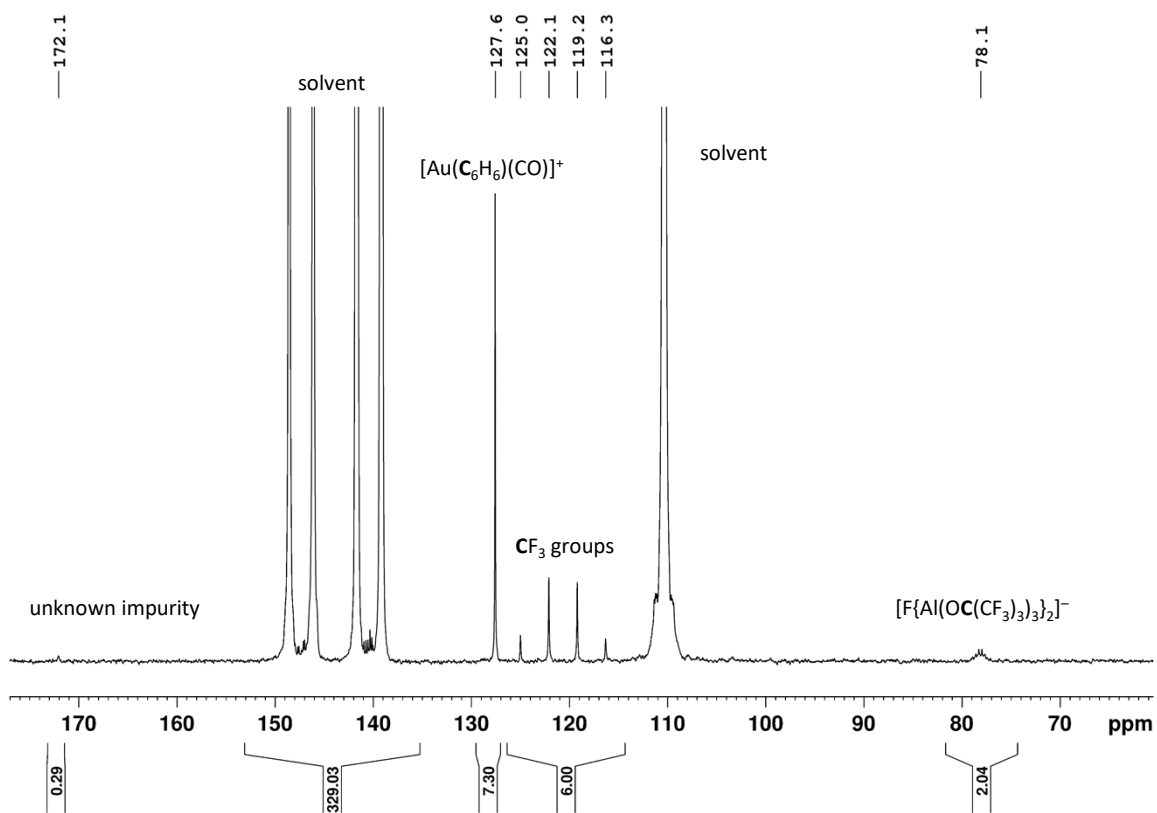

Figure S 16:  $^{13}\text{C}\{^1\text{H}\}$  NMR (100.62 MHz, 4FB, 233 K) spectrum of **4**.

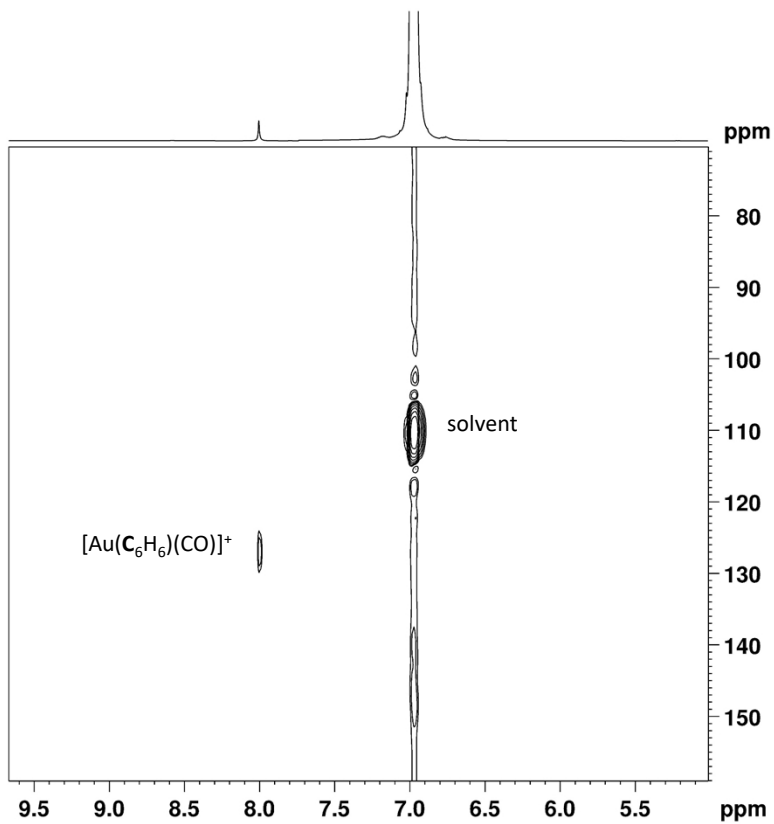

Figure S 17:  $^1\text{H},^{13}\text{C}$ -HMBC NMR (400.17 MHz, 4FB, 233 K) spectrum of 4.

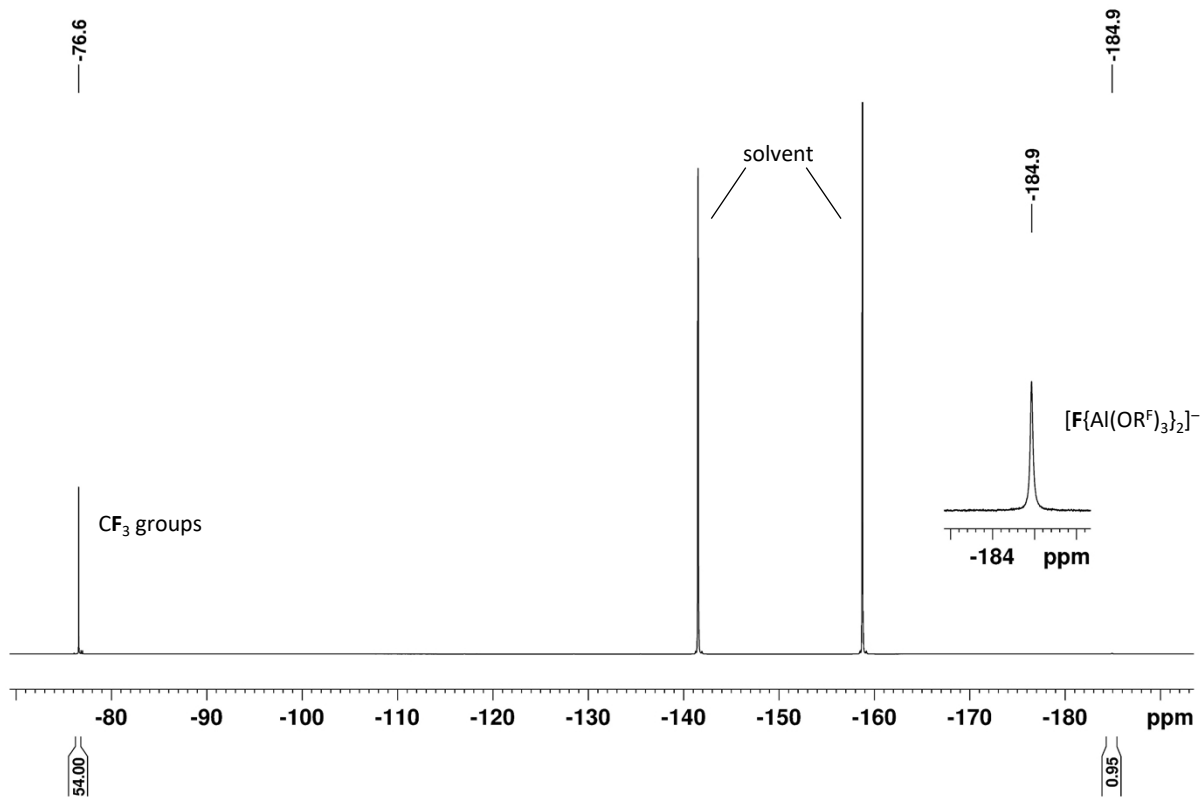

Figure S 18:  $^{19}\text{F}$  NMR (376.53 MHz, 4FB, 233 K) spectrum of 4.

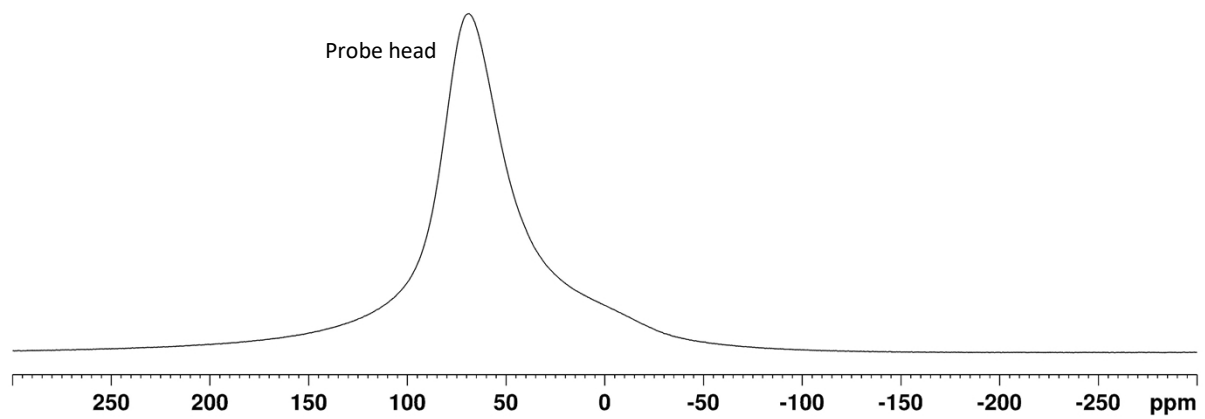

Figure S 19:  $^{27}\text{Al}$  NMR (104.27 MHz, 4FB, 233 K) spectrum of 4.

#### 4.5 Reactions of $[\text{Au}(\text{CO})_2]^+$ with acetylene

$[\text{Au}(\text{CO})_2][\text{F}\{\text{Al}(\text{OR}^{\text{F}})_3\}_2]$  (55.4 mg, 0.0319 mmol) was dissolved in 4FB (3 mL). The solution was frozen with liquid nitrogen, the system evacuated, and the tube was flooded with  $\text{C}_2\text{H}_2$  (2 bar). The mixture was stirred for 10 min at RT. Meanwhile, a large amount of a black solid precipitated. The reaction was repeated at  $-35\text{ }^\circ\text{C}$  with the same observation.

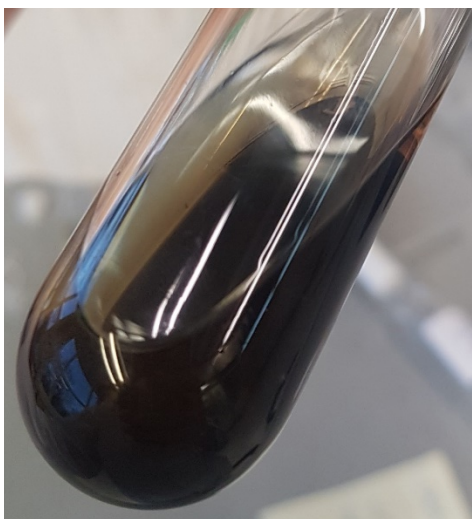

**Figure S 20:** Black solid after the reaction of **1** in 4FB with acetylene at RT.

## 5. Vibrational Spectra and Analysis

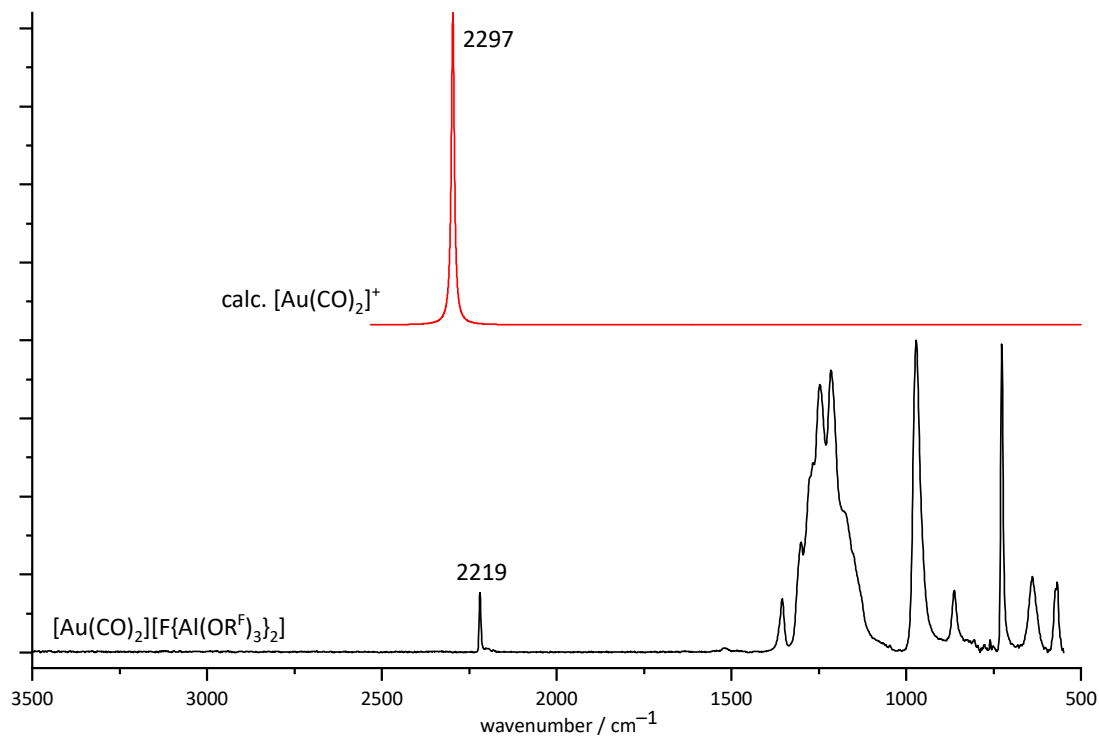

**Figure S6-1:** IR spectrum of **1** (black) and the calculated spectrum of  $[\text{Au}(\text{CO})_2]^+$  at the B3LYP(D3BJ)/def2-TZVPP level of theory (red).

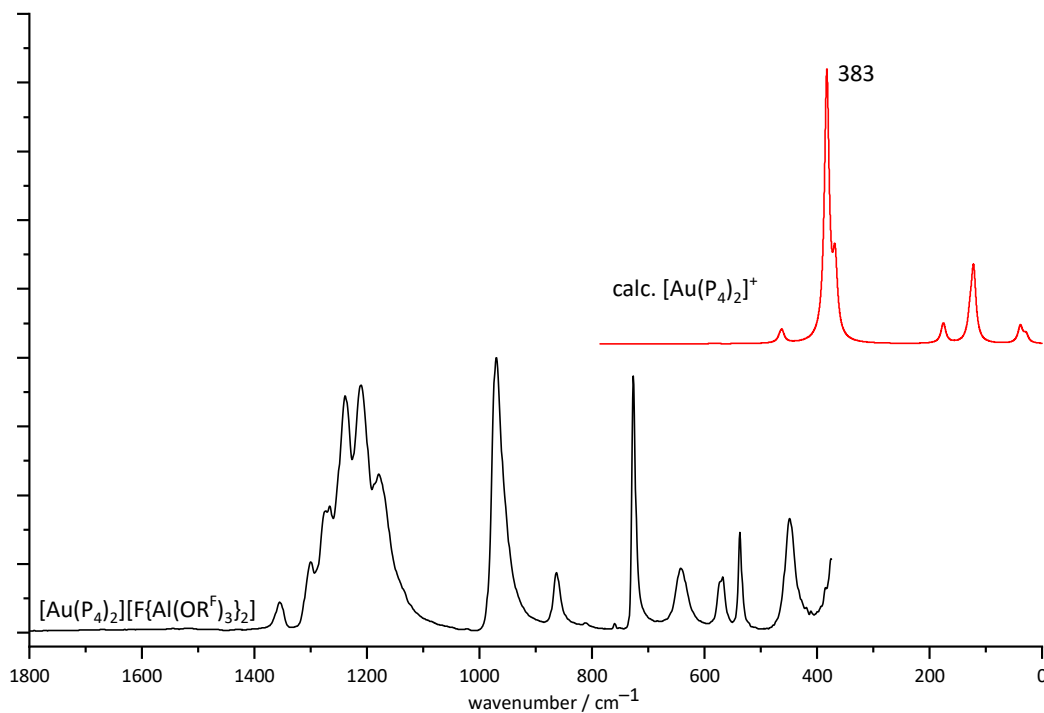

**Figure S21:** IR spectrum of **2** (black) and the calculated spectrum of  $[\text{Au}(\text{P}_4)_2]^+$  at the B3LYP(D3BJ)/def2-TZVPP level of theory (red). The vibrational bands of the  $[\text{Au}(\text{P}_4)_2]^+$  cation are expected below 400  $\text{cm}^{-1}$ , which is beyond the spectral range of the IR spectrometer. Therefore, only the vibrational bands of the anion are visible above 400  $\text{cm}^{-1}$ .

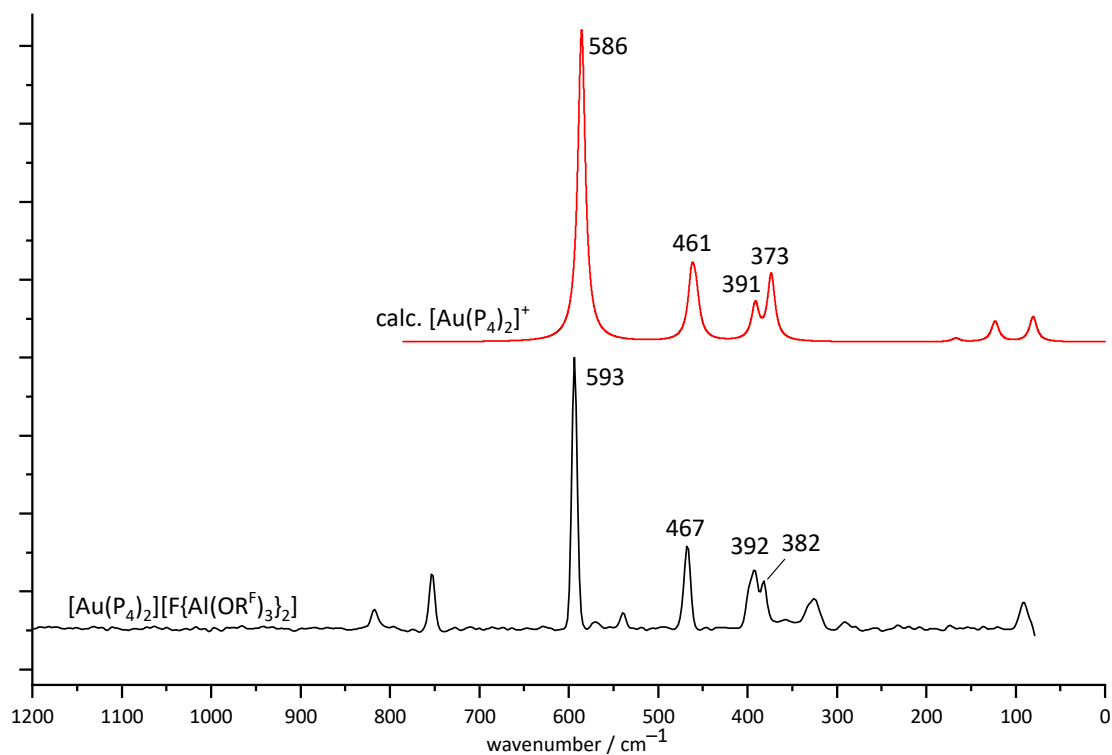

**Figure S 22:** Raman spectrum (3,000 scans, 25 mW, individual baseline correction) of **2** (black) and the calculated spectrum of [Au(P<sub>4</sub>)<sub>2</sub>]<sup>+</sup> at the B3LYP(D3BJ)/def2-TZVPP level of theory (red).

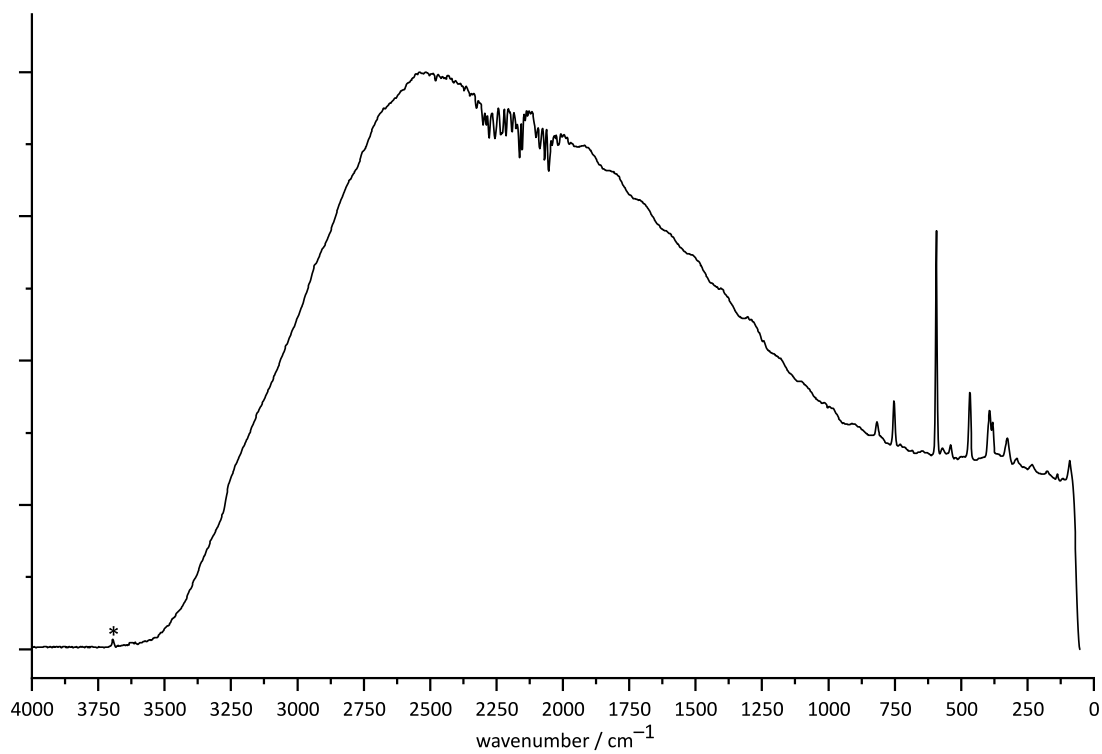

**Figure S 23:** Raman spectrum (3,000 scans, 25 mW) of **2** (black) without baseline correction. The band marked with "\*" is an artifact of the spectrometer.

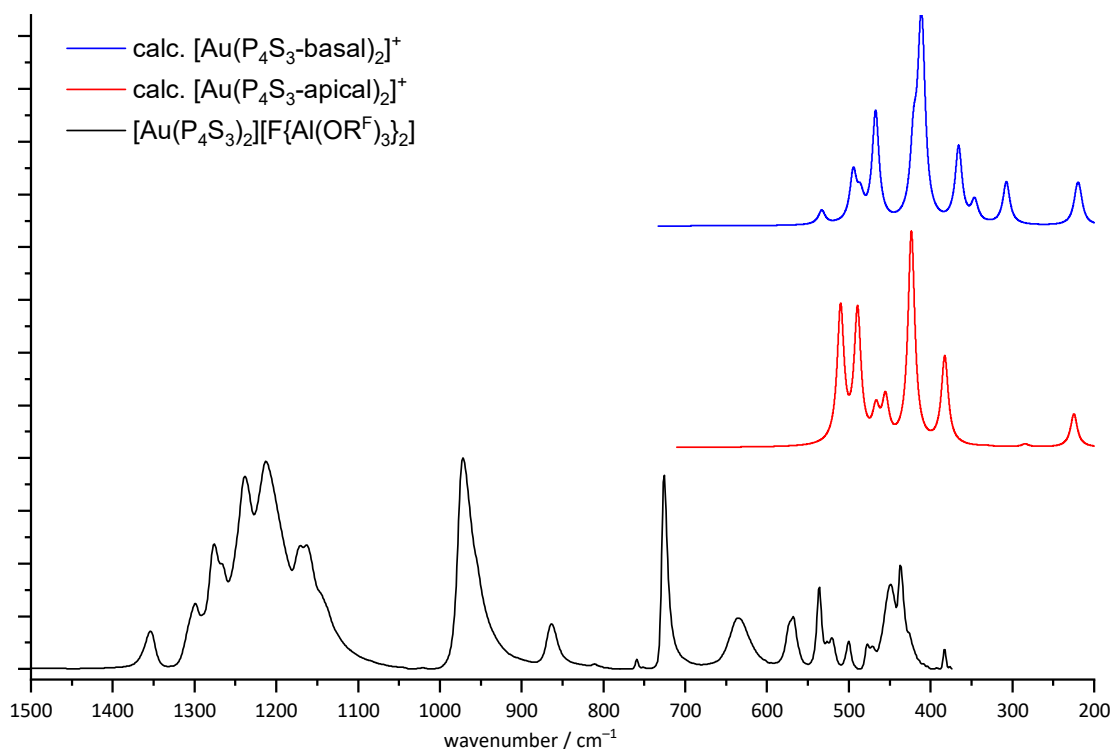

**Figure S 24:** IR spectrum of **3** (black) and the calculated spectrum of [Au(P<sub>4</sub>S<sub>3</sub>)<sub>2</sub>]<sup>+</sup> with the coordination of the apical phosphor atom (red) or one of the basal phosphor atoms (blue) at the B3LYP(D3BJ)/def2-TZVPP level of theory. The calculated vibrational spectra were scaled by 1.02549.

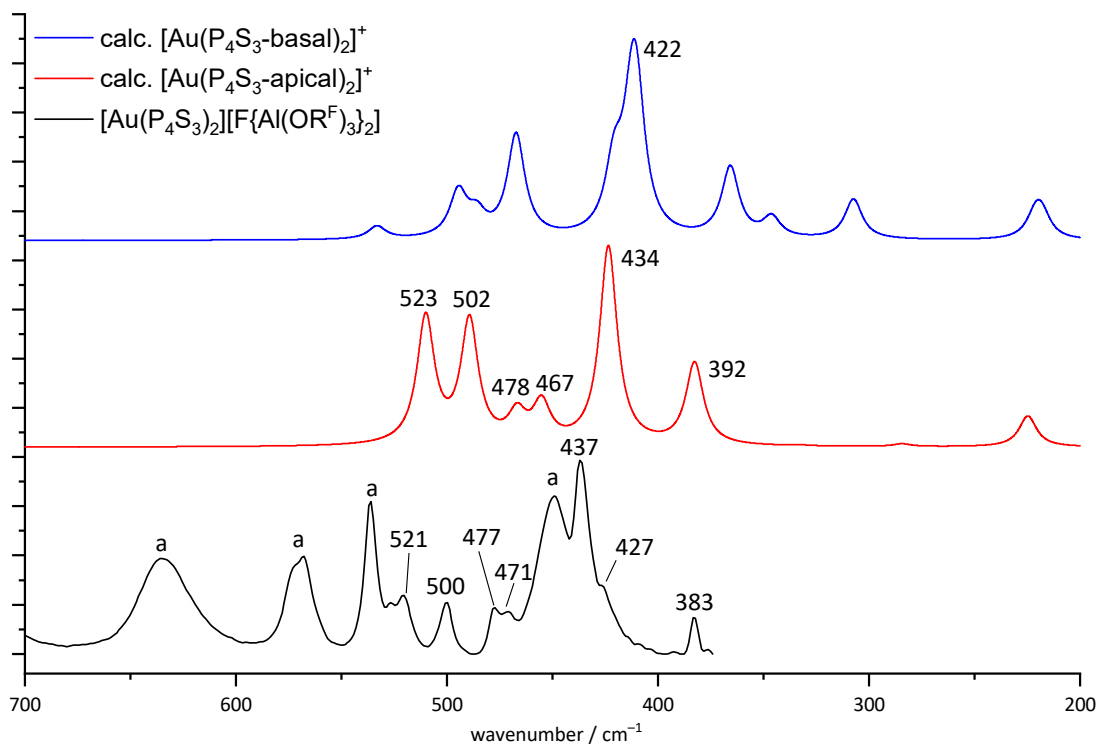

**Figure S 25:** IR spectrum between 700 cm<sup>-1</sup> and 200 cm<sup>-1</sup> of **3** (black) and the calculated spectrum of [Au(P<sub>4</sub>S<sub>3</sub>)<sub>2</sub>]<sup>+</sup> with the coordination of the apical phosphor atom (red) or one of the basal phosphor atoms (blue) at the B3LYP(D3BJ)/def2-TZVPP level of theory. The bands marked with "a" are caused by the [F{Al(OR<sup>F</sup>)<sub>3</sub>]<sub>2</sub><sup>-</sup> anion. The calculated vibrational spectra were scaled by 1.02549.



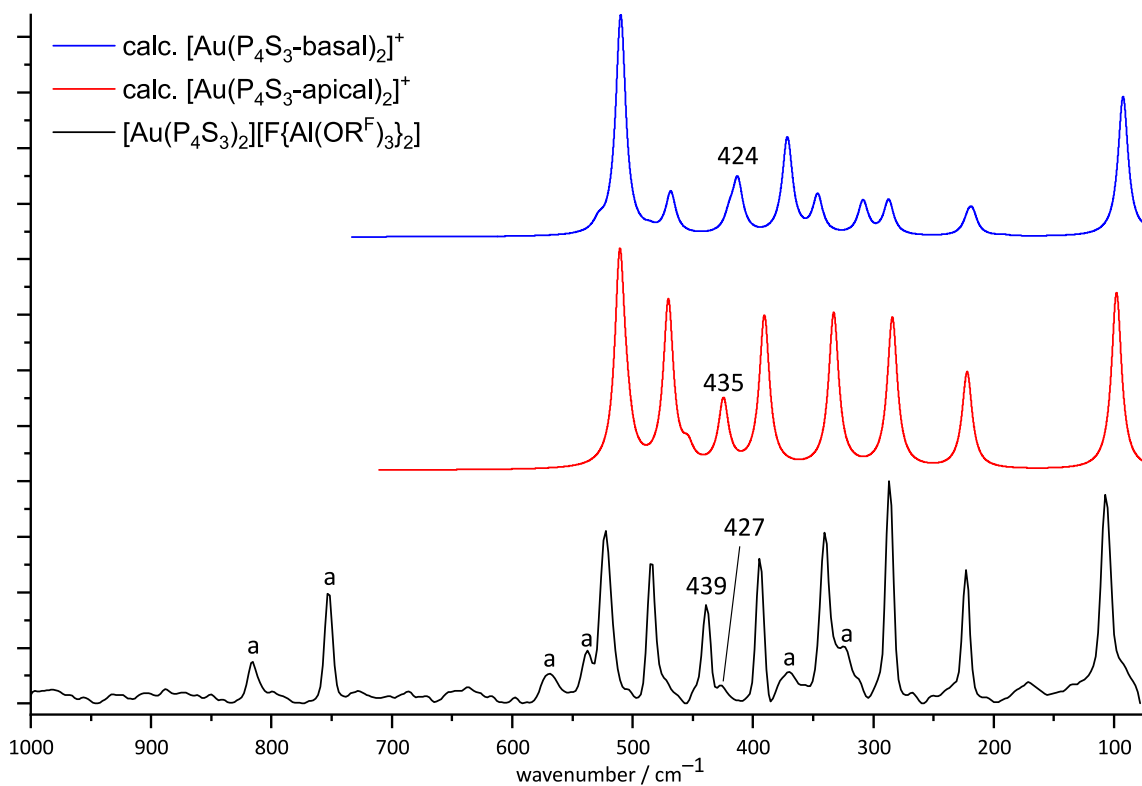

**Figure S 26:** Raman spectrum (5,000 scans, 20 mW, individual baseline correction) of **3** (black) and the calculated spectrum of  $[\text{Au}(\text{P}_4\text{S}_3)_2]^+$  with the coordination of the apical phosphor atom (red) or one of the basal phosphor atoms (blue) at the B3LYP(D3BJ)/def2-TZVPP level of theory. The band marked with "a" are caused by the  $[\text{F}\{\text{Al}(\text{OR}^{\text{F}})_3\}_2]^-$  anion. The calculated vibrational spectra were scaled by 1.02549.

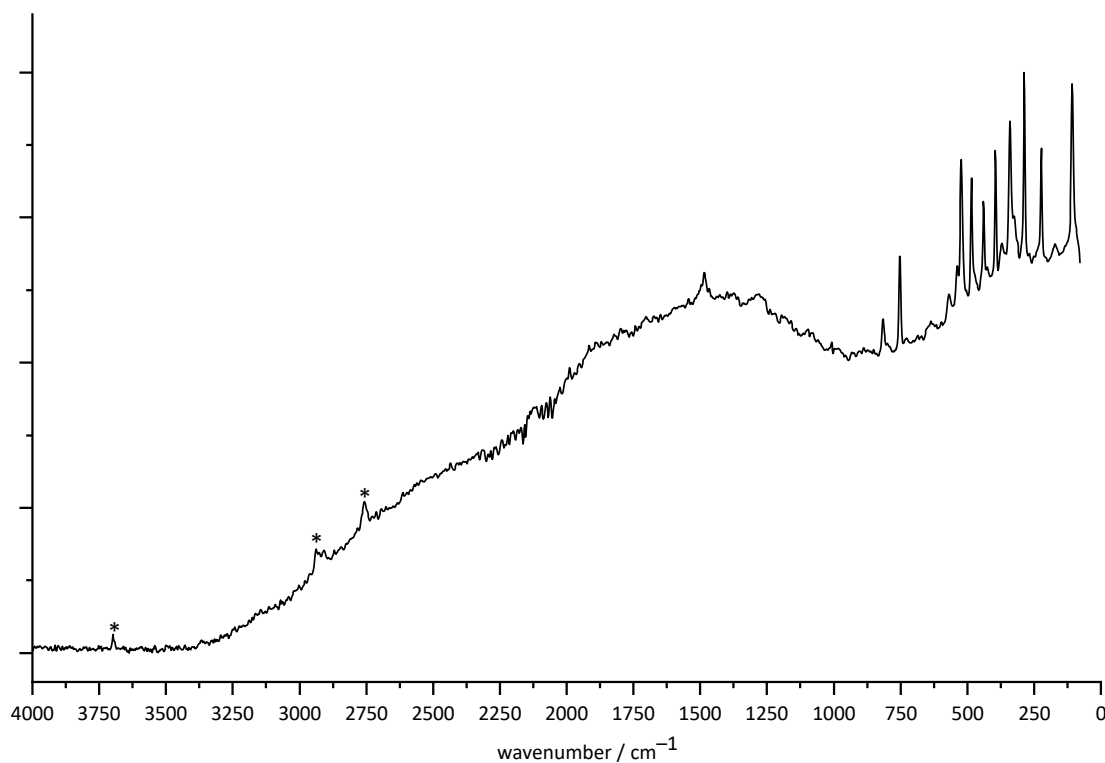

**Figure S 27:** Raman spectrum (5,000 scans, 20 mW) of **3** (black) without baseline correction. The bands marked with "\*" are artifacts of the spectrometer.

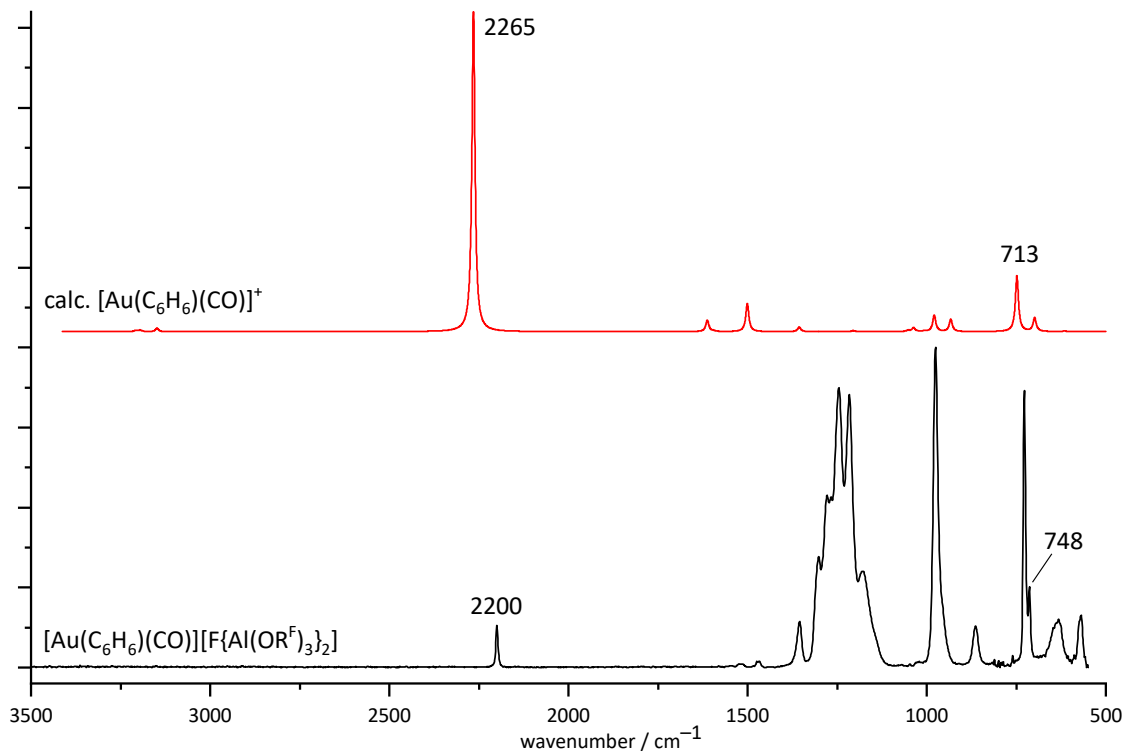

**Figure S 28:** IR spectrum of **4** (black) and the calculated spectrum of [Au(C<sub>6</sub>H<sub>6</sub>)(CO)]<sup>+</sup> at the B3LYP(D3BJ)/def2-TZVPP level of theory (red).

**Table S 1:** Assignment of IR and Raman vibrations of compound **1**, **2**, **3** and **4**.

| 1<br>IR   | 2         |                      | 3                                |                                            | 4<br>IR   | [F{Al(OR <sup>F</sup> ) <sub>3</sub> } <sub>2</sub> ] <sup>-[a]</sup> |                                                       | Assignment <sup>[b]</sup>                                                                                                                                                                                                                                                                                                                                                                       |
|-----------|-----------|----------------------|----------------------------------|--------------------------------------------|-----------|-----------------------------------------------------------------------|-------------------------------------------------------|-------------------------------------------------------------------------------------------------------------------------------------------------------------------------------------------------------------------------------------------------------------------------------------------------------------------------------------------------------------------------------------------------|
|           | IR        | Raman                | IR                               | Raman                                      |           | IR                                                                    | Raman                                                 |                                                                                                                                                                                                                                                                                                                                                                                                 |
|           |           | 91 (w)               |                                  | 107 (vs)<br>171 (vw)<br>223 (m)            |           |                                                                       |                                                       | [Au(P <sub>4</sub> S <sub>3</sub> ) <sub>2</sub> ] <sup>+</sup><br>[Au(P <sub>4</sub> S <sub>3</sub> ) <sub>2</sub> ] <sup>+</sup>                                                                                                                                                                                                                                                              |
|           |           |                      |                                  | 286 (vs)<br>324 (w)<br>340 (s)<br>370 (vw) |           |                                                                       | 234 (vww)<br>291 (vw)<br>328 (ms)<br>370 (vw)         | [Au(P <sub>4</sub> S <sub>3</sub> ) <sub>2</sub> ] <sup>+</sup> + C–C<br>C–C, Al–O<br>[Au(P <sub>4</sub> S <sub>3</sub> ) <sub>2</sub> ] <sup>+</sup><br>C–C, C–F, Al–O                                                                                                                                                                                                                         |
|           |           | 325 (w)              |                                  |                                            |           |                                                                       |                                                       | [Au(P <sub>4</sub> ) <sub>2</sub> ] <sup>+</sup><br>[Au(P <sub>4</sub> S <sub>3</sub> ) <sub>2</sub> ] <sup>+</sup>                                                                                                                                                                                                                                                                             |
|           |           | 382 (w)              | 383 (vw)                         |                                            |           |                                                                       |                                                       | [Au(P <sub>4</sub> ) <sub>2</sub> ] <sup>+</sup><br>[Au(P <sub>4</sub> S <sub>3</sub> ) <sub>2</sub> ] <sup>+</sup>                                                                                                                                                                                                                                                                             |
|           |           | 392 (w)              |                                  | 394 (s)                                    |           |                                                                       |                                                       | [Au(P <sub>4</sub> ) <sub>2</sub> ] <sup>+</sup><br>[Au(P <sub>4</sub> S <sub>3</sub> ) <sub>2</sub> ] <sup>+</sup>                                                                                                                                                                                                                                                                             |
|           | 449 (w)   |                      | 427 (vw)<br>437 (m),<br>449 (m)  | 427 (vw)<br>439 (m)                        |           |                                                                       |                                                       | [Au(P <sub>4</sub> S <sub>3</sub> -basal) <sub>2</sub> ] <sup>+</sup><br>[Au(P <sub>4</sub> S <sub>3</sub> ) <sub>2</sub> ] <sup>+</sup><br>Al–O                                                                                                                                                                                                                                                |
|           |           | 467 (w)              |                                  |                                            |           |                                                                       |                                                       | [Au(P <sub>4</sub> ) <sub>2</sub> ] <sup>+</sup><br>[Au(P <sub>4</sub> S <sub>3</sub> ) <sub>2</sub> ] <sup>+</sup> |
|           |           |                      | 471 (vw)<br>477 (vw)             |                                            |           |                                                                       |                                                       |                                                                                                                                                                                                                                                                                                                                                                                                 |
|           |           |                      |                                  | 485 (s)                                    |           |                                                                       |                                                       | [Au(P <sub>4</sub> S <sub>3</sub> ) <sub>2</sub> ] <sup>+</sup>                                                                                                                                                                                                                                                                                                                                 |
|           |           |                      | 500 (vw)<br>521 (vw)<br>527 (vw) | 523 (s)                                    |           |                                                                       |                                                       | [Au(P <sub>4</sub> S <sub>3</sub> ) <sub>2</sub> ] <sup>+</sup><br>[Au(P <sub>4</sub> S <sub>3</sub> ) <sub>2</sub> ] <sup>+</sup>                                                                                                                                                                                                                                                              |
|           | 537 (w)   | 539 (vw)             | 536 (w)                          | 538 (w)                                    |           |                                                                       | 539 (vw)                                              | C–C, C–O                                                                                                                                                                                                                                                                                                                                                                                        |
| 568 (w)   | 568 (vw)  | 570 (vw)<br>593 (vs) | 568 (w)                          | 569 (vw)                                   | 569 (vw)  | 568 (vw)                                                              | 571 (vw)                                              | Al–O, C–C<br>sym. [Au(P <sub>4</sub> ) <sub>2</sub> ] <sup>+</sup>                                                                                                                                                                                                                                                                                                                              |
| 639 (w)   | 642 (w)   |                      | 635 (w)                          |                                            |           | 632 (vw)<br>713 (w)                                                   | 639 (w)                                               | Al–F–Al<br>C <sub>6</sub> H <sub>6</sub> , out-of-plane C–H bend                                                                                                                                                                                                                                                                                                                                |
| 727 (vs)  | 726 (vs)  |                      | 726 (vs)                         |                                            |           | 728 (vs)                                                              | 726 (vvs)                                             | C–C, C–O                                                                                                                                                                                                                                                                                                                                                                                        |
|           |           | 753 (w)              |                                  | 753 (m)                                    |           |                                                                       | 751 (vww)<br>753 (ms)                                 | Al–O<br>C–C, C–O                                                                                                                                                                                                                                                                                                                                                                                |
| 760 (vw)  | 760 (vw)  |                      | 759 (vw)                         |                                            | 760 (vw)  | 760 (vww)                                                             | 760 (vww)                                             | Al–O                                                                                                                                                                                                                                                                                                                                                                                            |
|           |           | 817 (vw)             |                                  | 816 (vw)                                   |           |                                                                       | 818 (vw)                                              | Al–O, Al–F–Al                                                                                                                                                                                                                                                                                                                                                                                   |
| 862 (vw)  | 863 (w)   |                      | 864 (w)                          |                                            | 864 (vw)  | 865 (w)                                                               | 865 (w)                                               | C–C, C–F                                                                                                                                                                                                                                                                                                                                                                                        |
| 971 (vs)  | 970 (vs)  |                      | 972 (vs)                         |                                            | 975 (vs)  | 972 (vvs)                                                             | 980 (vww) <sup>[b]</sup><br>1131 (vww) <sup>[b]</sup> | C–C, C–F<br>C–C, C–F                                                                                                                                                                                                                                                                                                                                                                            |
|           |           |                      | 1163 (m)                         |                                            |           |                                                                       | 1180 (vww) <sup>[b]</sup>                             | C–C, C–F                                                                                                                                                                                                                                                                                                                                                                                        |
| 1178(w)   | 1179 (m)  |                      | 1171 (m)                         |                                            | 1180 (w)  | 1184 (s)                                                              | 1180 (vww) <sup>[b]</sup>                             | C–C, C–F                                                                                                                                                                                                                                                                                                                                                                                        |
| 1215 (vs) | 1211 (vs) |                      | 1213 (vs)                        |                                            | 1216 (vs) | 1216 (vvs)                                                            |                                                       | C–C, C–F                                                                                                                                                                                                                                                                                                                                                                                        |
| 1247 (vs) | 1238 (vs) |                      | 1238 (vs)                        |                                            | 1245 (vs) | 1247 (vvs)                                                            | 1244 (vww) <sup>[b]</sup>                             | C–C, C–F                                                                                                                                                                                                                                                                                                                                                                                        |
| 1266 (s)  | 1266 (m)  |                      |                                  |                                            | 1267 (m)  |                                                                       |                                                       | C–C, C–F                                                                                                                                                                                                                                                                                                                                                                                        |
|           | 1274 (m)  |                      | 1276 (m)                         |                                            | 1278 (m)  |                                                                       |                                                       |                                                                                                                                                                                                                                                                                                                                                                                                 |
|           |           |                      |                                  | 1279 (vw)                                  |           |                                                                       | 1281 (vww) <sup>[b]</sup>                             | C–C, C–F                                                                                                                                                                                                                                                                                                                                                                                        |
| 1301 (w)  | 1300 (w)  |                      | 1299 (w)                         |                                            | 1301 (w)  | 1300 (mw)                                                             | 1304 (vww) <sup>[b]</sup>                             | C–C, C–F                                                                                                                                                                                                                                                                                                                                                                                        |
| 1354 (vw) | 1355 (vw) |                      | 1354 (vw)                        |                                            | 1355 (vw) | 1355 (vw)                                                             |                                                       | C–C, C–F                                                                                                                                                                                                                                                                                                                                                                                        |
|           |           |                      |                                  | 1495 (vw)                                  |           |                                                                       |                                                       | C <sub>6</sub> H <sub>6</sub> , in-plane C–H bend<br>C <sub>6</sub> H <sub>6</sub> , in-plane C–H bend<br>C <sub>6</sub> H <sub>6</sub> , ring deformation<br>C <sub>6</sub> H <sub>6</sub> , ring deformation                                                                                                                                                                                  |
| 2219 (vw) |           |                      |                                  |                                            | 2200 (vw) |                                                                       |                                                       | <i>v<sub>asym</sub></i> (CO)                                                                                                                                                                                                                                                                                                                                                                    |

a) For comparison, the IR and Raman vibrations of the anion of [Cr(CO)<sub>6</sub>][F{Al(OR<sup>F</sup>)<sub>3</sub>}<sub>2</sub>]<sup>29</sup> are given. Here the intensities are given as: vww = very very weak (< 0.1), vw = very weak (< 0.2), w = weak (< 0.3), mw = medium weak (< 0.4), m = medium (< 0.5), ms = medium strong (< 0.6), s = strong (< 0.7), vs = very strong (< 0.8), vvs = very very strong (≥ 0.9). b) Due to the low intensity, these bands were not observed in the Raman spectrum of **2** and **3**.

**Table S 2:** Observed and calculated (B3LYP(D3BJ)/def2-TZVPP) frequencies and intensities (in parentheses) of the most intense vibrational bands of the cation in **1**, together with the corresponding scaled displacement vectors.

| <b>1</b>                |                            | calc. $[\text{Au}(\text{CO})_2]^+$                                                |                                                                                    |
|-------------------------|----------------------------|-----------------------------------------------------------------------------------|------------------------------------------------------------------------------------|
| IR $\nu/\text{cm}^{-1}$ | Raman $\nu/\text{cm}^{-1}$ | IR $\nu(\text{CO})/\text{cm}^{-1}$                                                | Raman $\nu(\text{CO})/\text{cm}^{-1}$                                              |
| 2219 (vw)               |                            |  |  |
|                         | [a]                        | 2297 (100)                                                                        | 2331 (100)                                                                         |

a) A Raman spectrum of **1** could not be obtained due to the decomposition of the compound during the measurement.

**Table S 3:** Observed and calculated (B3LYP(D3BJ)/def2-TZVPP) frequencies and intensities (in parentheses) of the most intense vibrational bands of the cation in **2**, together with the corresponding scaled displacement vectors.

| <b>2</b>                |                            | calc. $[\text{Au}(\text{P}_4)_2]^+$                                                  |                                                                                       |
|-------------------------|----------------------------|--------------------------------------------------------------------------------------|---------------------------------------------------------------------------------------|
| IR $\nu/\text{cm}^{-1}$ | Raman $\nu/\text{cm}^{-1}$ | IR $\nu(\text{CO})/\text{cm}^{-1}$                                                   | Raman $\nu(\text{CO})/\text{cm}^{-1}$                                                 |
|                         | [a]                        | 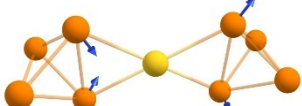   |                                                                                       |
|                         |                            | 368 (27)                                                                             |                                                                                       |
| 382 (w)                 |                            |  |  |
|                         |                            | 373(13)                                                                              | 373 (8)                                                                               |
|                         | a                          |   |                                                                                       |
|                         |                            | 383 (100)                                                                            |                                                                                       |
| 392 (w)                 |                            |  |                                                                                       |
|                         |                            | 391 (11)                                                                             |                                                                                       |
| 467 (w)                 |                            |  |  |
|                         |                            | 458(11)                                                                              | 462(19)                                                                               |
| 593 (vs)                |                            |  |                                                                                       |
|                         |                            | 586 (100)                                                                            |                                                                                       |

a) Out of range of the experimental IR spectrum.

**Table S 4:** Observed and calculated (B3LYP(D3BJ)/def2-TZVPP) frequencies and intensities (in parentheses) of the most intense vibrational bands of the cation in **3**, together with the corresponding scaled displacement vectors. The calculated vibrational frequencies were scaled by 1.02549.

| <b>3</b>                   |                               | calc. $[\text{Au}(\text{P}_4\text{S}_3)_2]^+$                                                                  |                                                                                                               |
|----------------------------|-------------------------------|----------------------------------------------------------------------------------------------------------------|---------------------------------------------------------------------------------------------------------------|
| IR<br>$\nu/\text{cm}^{-1}$ | Raman<br>$\nu/\text{cm}^{-1}$ | IR<br>$\nu(\text{CO})/\text{cm}^{-1}$                                                                          | Raman<br>$\nu(\text{CO})/\text{cm}^{-1}$                                                                      |
| 107 (vs)                   |                               |                                                                                                                | 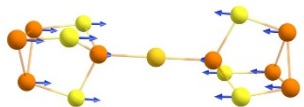<br>100(85)                |
| 223 (m)                    |                               |                              | <br>228(23)                |
| 286 (vs)                   |                               |                              | <br>291(25)                |
| 340 (s)                    |                               |                              | <br>341(37)                |
| 383 (vw)                   |                               | <br>392(41)                 |                                                                                                               |
| 394 (s)                    |                               |                                                                                                                | <br>400(72)              |
| 427 (vw) <sup>a</sup>      | 427 (vw) <sup>a</sup>         | <br>421(100) <sup>[a]</sup> | <br>423(22) <sup>a</sup> |
| 437 (m),                   | 439 (m)                       | <br>434(100)                | <br>435(31)              |
| 471 (vw)                   |                               | <br>467(10)                 | <br>467(10)              |

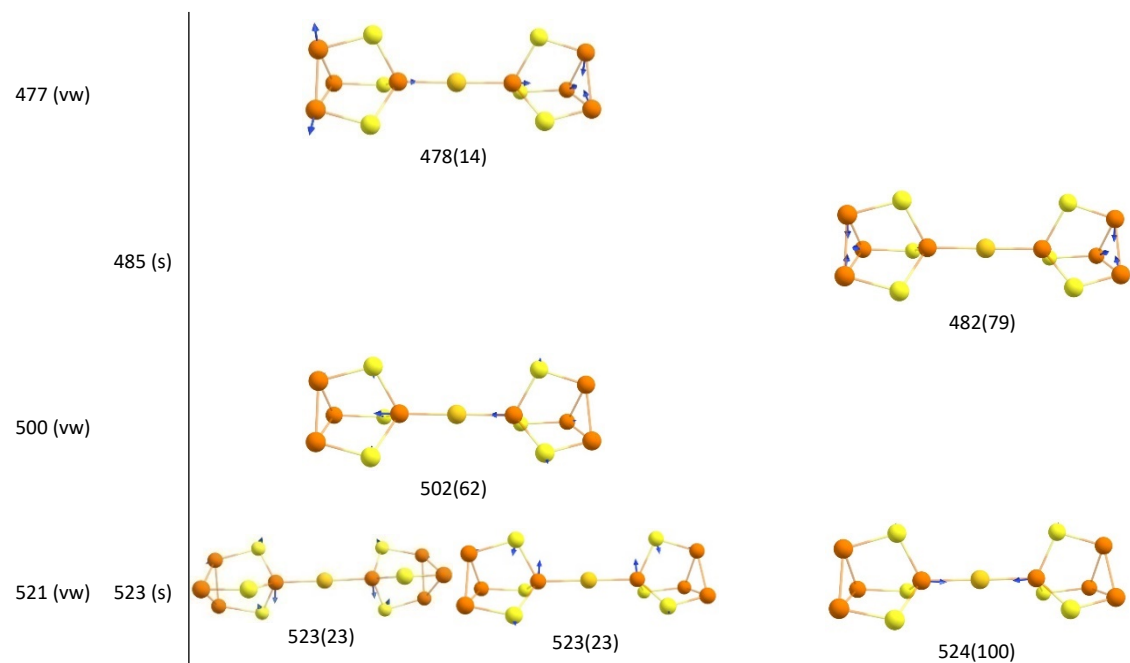

a) These vibrational bands are likely caused by the basal coordination of the  $P_4S_3$  cage. The basal coordination of the  $P_4S_3$  cage was also observed as a minority component in the crystal structure of **3** (Figure S 30).

**Table S 5:** Observed and calculated (B3LYP(D3BJ)/def2-TZVPP) frequencies and intensities (in parentheses) of the most intense vibrational bands of the cation in **4**, together with the corresponding scaled displacement vectors.

| 4                            | calc. $[\text{Au}(\text{C}_6\text{H}_6)(\text{CO})]^+$                                            |
|------------------------------|---------------------------------------------------------------------------------------------------|
| IR<br>$\nu / \text{cm}^{-1}$ | IR<br>$\nu (\text{CO}) / \text{cm}^{-1}$                                                          |
| 713 (w)                      | <br>748 (17)     |
| 1468 (vw)                    | <br>1500 (6)     |
| 1474(vw)                     | <br>1501 (3)    |
| 1516(vw)                     | <br>1594(0.2)  |
| 1524(vw)                     | <br>1612 (4)   |
| 2200 (vw)                    | <br>2265 (100) |

## 6. Single-Crystal XRD Data

Table S 6: Crystallographic data for compounds **1**, **2**, **3** and **4**.

|                                                              | <b>1</b>                                                                        | <b>2</b>                                                                        | <b>3</b>                                                                                       | <b>4</b>                                                                        |
|--------------------------------------------------------------|---------------------------------------------------------------------------------|---------------------------------------------------------------------------------|------------------------------------------------------------------------------------------------|---------------------------------------------------------------------------------|
| CCDC number                                                  | 2270712                                                                         | 2270713                                                                         | 2270715                                                                                        | 2270714                                                                         |
| Empirical formula                                            | C <sub>26</sub> Al <sub>2</sub> AuF <sub>55</sub> O <sub>8</sub>                | C <sub>24</sub> Al <sub>2</sub> AuF <sub>55</sub> O <sub>6</sub> P <sub>8</sub> | C <sub>24</sub> Al <sub>2</sub> AuF <sub>55</sub> O <sub>6</sub> P <sub>8</sub> S <sub>6</sub> | C <sub>37</sub> H <sub>8</sub> Al <sub>2</sub> AuF <sub>59</sub> O <sub>7</sub> |
| Formula weight                                               | 1736.19                                                                         | 1927.93                                                                         | 2120.29                                                                                        | 1936.36                                                                         |
| Temperature /K                                               | 100(2)                                                                          | 100(2)                                                                          | 100(2)                                                                                         | 100(2)                                                                          |
| Crystal system                                               | triclinic                                                                       | monoclinic                                                                      | triclinic                                                                                      | monoclinic                                                                      |
| Space group (number)                                         | <i>P</i> $\bar{1}$ (2)                                                          | <i>C</i> 2/ <i>c</i> (15)                                                       | <i>P</i> $\bar{1}$ (2)                                                                         | <i>P</i> 2 <sub>1</sub> (4)                                                     |
| <i>a</i> /Å                                                  | 10.6511(15)                                                                     | 19.631(4)                                                                       | 10.475(2)                                                                                      | 10.3633(17)                                                                     |
| <i>b</i> /Å                                                  | 14.425(3)                                                                       | 12.986(2)                                                                       | 12.589(3)                                                                                      | 21.779(5)                                                                       |
| <i>c</i> /Å                                                  | 17.025(4)                                                                       | 20.436(5)                                                                       | 12.778(3)                                                                                      | 12.483(3)                                                                       |
| $\alpha$ /°                                                  | 99.886(8)                                                                       | 90                                                                              | 116.446(8)                                                                                     | 90                                                                              |
| $\beta$ /°                                                   | 107.015(7)                                                                      | 90.606(11)                                                                      | 91.106(10)                                                                                     | 98.548(8)                                                                       |
| $\gamma$ /°                                                  | 107.198(6)                                                                      | 90                                                                              | 98.160(8)                                                                                      | 90                                                                              |
| Volume/Å <sup>3</sup>                                        | 2292.0(7)                                                                       | 5210(2)                                                                         | 1486.9(6)                                                                                      | 2786.2(10)                                                                      |
| <i>Z</i>                                                     | 2                                                                               | 4                                                                               | 1                                                                                              | 2                                                                               |
| $\rho_{\text{calc}}/\text{g cm}^{-3}$                        | 2.516                                                                           | 2.458                                                                           | 2.368                                                                                          | 2.308                                                                           |
| $\mu/\text{mm}^{-1}$                                         | 3.521                                                                           | 3.343                                                                           | 3.143                                                                                          | 2.918                                                                           |
| <i>F</i> (000)                                               | 1640                                                                            | 3648                                                                            | 1008                                                                                           | 1844                                                                            |
| Crystal size/mm <sup>3</sup>                                 | 0.30×0.18×0.08                                                                  | 0.14×0.12×0.09                                                                  | 0.172×0.042×0.04                                                                               | 0.483×0.318×0.126                                                               |
| Crystal color                                                | colorless                                                                       | colorless                                                                       | colorless                                                                                      | colorless                                                                       |
| Crystal shape                                                | block                                                                           | block                                                                           | needle                                                                                         | block                                                                           |
| Radiation                                                    | MoK $\alpha$ ( $\lambda$ =0.71073 Å)                                            | MoK $\alpha$ ( $\lambda$ =0.71073 Å)                                            | MoK $\alpha$ ( $\lambda$ =0.71073 Å)                                                           | MoK $\alpha$ ( $\lambda$ =0.71073 Å)                                            |
| 2 $\theta$ range/°                                           | 2.61 to 61.20 (0.70 Å)                                                          | 3.76 to 61.18 (0.70 Å)                                                          | 3.58 to 63.31 (0.68 Å)                                                                         | 3.30 to 72.81 (0.60 Å)                                                          |
| Index ranges                                                 | -15 ≤ <i>h</i> ≤ 15<br>-20 ≤ <i>k</i> ≤ 20<br>-24 ≤ <i>l</i> ≤ 24               | -28 ≤ <i>h</i> ≤ 28<br>-18 ≤ <i>k</i> ≤ 18<br>-29 ≤ <i>l</i> ≤ 29               | -15 ≤ <i>h</i> ≤ 15<br>-18 ≤ <i>k</i> ≤ 16<br>0 ≤ <i>l</i> ≤ 18                                | -17 ≤ <i>h</i> ≤ 16<br>-36 ≤ <i>k</i> ≤ 34<br>-19 ≤ <i>l</i> ≤ 19               |
| Reflections collected                                        | 128923                                                                          | 297593                                                                          | 9917                                                                                           | 317126                                                                          |
| Independent reflections                                      | 14102<br><i>R</i> <sub>int</sub> = 0.0330<br><i>R</i> <sub>sigma</sub> = 0.0175 | 8007<br><i>R</i> <sub>int</sub> = 0.0792<br><i>R</i> <sub>sigma</sub> = 0.0181  | 9917<br><i>R</i> <sub>int</sub> = 0.0699<br><i>R</i> <sub>sigma</sub> = 0.0358                 | 24148<br><i>R</i> <sub>int</sub> = 0.0412<br><i>R</i> <sub>sigma</sub> = 0.0235 |
| Completeness to $\theta = 25.242^\circ$                      | 100.0 %                                                                         | 100.0 %                                                                         | 99.9 %                                                                                         | 100.0 %                                                                         |
| Data/Restraints/Parameters                                   | 14102/13428/1213                                                                | 8007/1731/435                                                                   | 9917/1922/527                                                                                  | 24148/13737/1418                                                                |
| Goodness-of-fit on <i>F</i> <sup>2</sup>                     | 1.022                                                                           | 1.070                                                                           | 1.039                                                                                          | 1.043                                                                           |
| Final <i>R</i> indexes [ <i>I</i> ≥ 2 $\sigma$ ( <i>I</i> )] | <i>R</i> <sub>1</sub> = 0.0293<br><i>wR</i> <sub>2</sub> = 0.0813               | <i>R</i> <sub>1</sub> = 0.0185<br><i>wR</i> <sub>2</sub> = 0.0441               | <i>R</i> <sub>1</sub> = 0.0441<br><i>wR</i> <sub>2</sub> = 0.1092                              | <i>R</i> <sub>1</sub> = 0.0325<br><i>wR</i> <sub>2</sub> = 0.0673               |
| Final <i>R</i> indexes [all data]                            | <i>R</i> <sub>1</sub> = 0.0365<br><i>wR</i> <sub>2</sub> = 0.0859               | <i>R</i> <sub>1</sub> = 0.0215<br><i>wR</i> <sub>2</sub> = 0.0448               | <i>R</i> <sub>1</sub> = 0.0541<br><i>wR</i> <sub>2</sub> = 0.1146                              | <i>R</i> <sub>1</sub> = 0.0471<br><i>wR</i> <sub>2</sub> = 0.0714               |
| Largest peak/hole / e Å <sup>-3</sup>                        | 1.18/-0.91                                                                      | 0.52/-0.67                                                                      | 2.15/-1.18                                                                                     | 1.36/-0.77                                                                      |



## 6.1 Crystal structure of $[\text{Au}(\text{CO})_2][\text{F}\{\text{Al}(\text{OR}^{\text{F}})_3\}_2] \mathbf{1}$

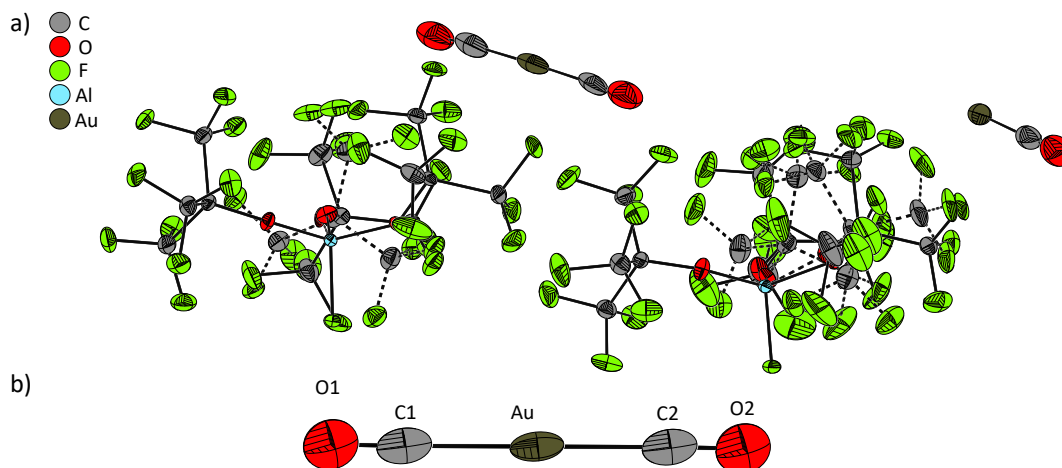

**Figure S6-2:** a) Asymmetric unit of **1** containing two half anion, one half cation and one disordered cation on a special position with an occupation of 50%. The minority part of disordered fragments is drawn with dashed bonds. b) Side view of one of the  $[\text{Au}(\text{CO})_2]^+$  cations in **1**. Thermal ellipsoids are shown at the 50% probability level.

**Table S6-1:** Experimental bond lengths [ $\text{\AA}$ ] and angles [ $^\circ$ ] of the  $[\text{Au}(\text{CO})_2]^+$  cations in **1** together with calculated values at the B3LYP(D3BJ)/def2-TZVPP level of theory.

|                                                      | <b>1</b>  | calc. $[\text{Au}(\text{CO})_2]^+$ |
|------------------------------------------------------|-----------|------------------------------------|
| Au–C1                                                | 1.983(4)  | 2.001                              |
| Au <sub>10</sub> –C1 <sub>10</sub>                   | 1.981(9)  |                                    |
| Au <sub>10</sub> –C2 <sub>10</sub>                   | 1.977(10) |                                    |
| Avg: Au–(CO) <sup>[a]</sup>                          | 1.980(2)  |                                    |
| C1–O1                                                | 1.099(4)  | 1.114                              |
| C1 <sub>10</sub> –O1 <sub>10</sub>                   | 1.088(10) |                                    |
| C2 <sub>10</sub> –O2 <sub>10</sub>                   | 1.118(11) |                                    |
| Avg: C–O <sup>[a]</sup>                              | 1.102(9)  |                                    |
| C1–Au–C1                                             | 180.0     | 180.0                              |
| C1 <sub>10</sub> –Au <sub>10</sub> –C2 <sub>10</sub> | 178.7(3)  |                                    |

a) Standard deviation of the mean was calculated as  $N^{-1/2}$  times the positive square root of the sample variance.<sup>30</sup>

## 6.2 Crystal structure of $[\text{Au}(\text{P}_4)_2][\text{F}\{\text{Al}(\text{OR}^{\text{F}})_3\}_2] \cdot 2$

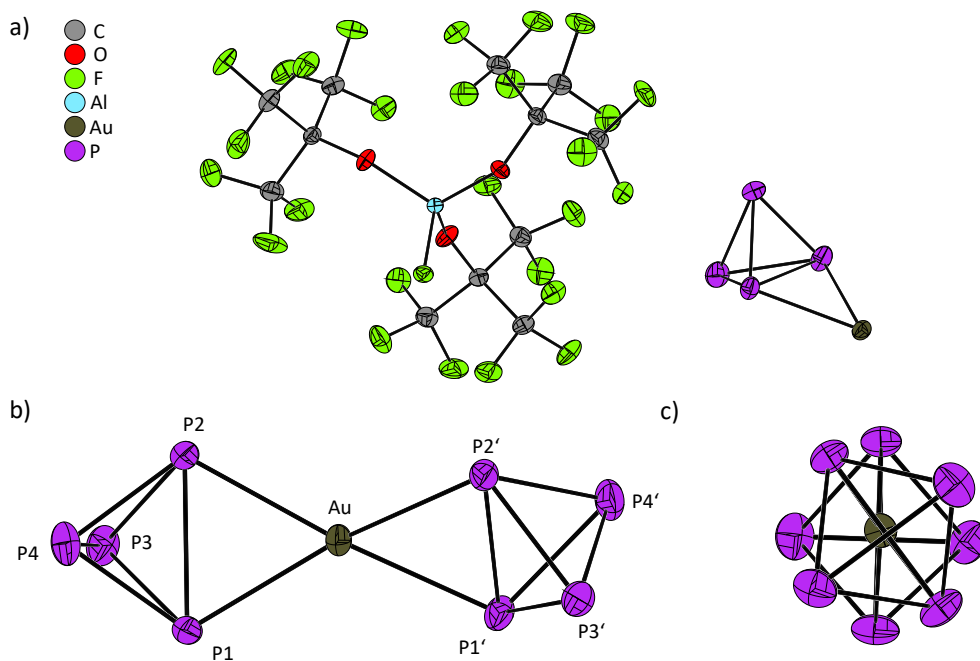

**Figure S 29:** a) Asymmetric unit of **2** containing one half cation and one half anion. b), c) Side view of the  $[\text{Au}(\text{P}_4)_2]^+$  cations in **2**. Thermal ellipsoids are shown at the 50% probability level.

**Table S 7:** Experimental M–P bond lengths [ $\text{\AA}$ ] and torsion angle [ $^\circ$ ] of the  $[\text{Au}(\text{P}_4)_2]^+$  cations in **2** together with calculated values at the B3LYP(D3BJ)/def2-TZVPP level of theory and literature-known compounds.

|                   | <b>2</b>  | calc.<br>$[\text{Au}(\text{P}_4)_2]^+$ | $[\text{Au}(\text{P}_4)_2][\text{GaCl}_4]^{31}$ | $[\text{Cu}(\text{P}_4)_2][\text{Al}(\text{OR}^{\text{F}})_4]^{32[\text{a}]}$ | $[\text{Ag}(\text{P}_4)_2][\text{Al}(\text{OR}^{\text{F}})_4]^{32[\text{a}]}$ | $[\text{Ag}(\text{P}_4)_2][\text{F}\{\text{Al}(\text{OR}^{\text{F}})_3\}_2]^{33}$ |
|-------------------|-----------|----------------------------------------|-------------------------------------------------|-------------------------------------------------------------------------------|-------------------------------------------------------------------------------|-----------------------------------------------------------------------------------|
| M–P1              | 2.4486(6) | 2.508                                  | 2.4408(8)                                       | 2.3445(19)                                                                    | 2.548(2)                                                                      | 2.5403(10)                                                                        |
| M–P2              | 2.4470(6) | 2.508                                  | 2.4457(8)                                       | 2.3440(19)                                                                    | 2.564(2)                                                                      | 2.5382(9)                                                                         |
|                   |           |                                        |                                                 | 2.3406(19)                                                                    | 2.550(2)                                                                      |                                                                                   |
|                   |           |                                        |                                                 | 2.3452(19)                                                                    | 2.552(2)                                                                      |                                                                                   |
|                   |           |                                        |                                                 | 2.3444(19)                                                                    | 2.562(2)                                                                      |                                                                                   |
|                   |           |                                        |                                                 | 2.3430(18)                                                                    | 2.551(2)                                                                      |                                                                                   |
|                   |           |                                        |                                                 | 2.3356(19)                                                                    | 2.552(2)                                                                      |                                                                                   |
|                   |           |                                        |                                                 | 2.339(2)                                                                      | 2.554(2)                                                                      |                                                                                   |
| P1–P2             | 2.3992(7) | 2.4310                                 | 2.4094(12)                                      | 2.326(3)                                                                      | 2.329(3)                                                                      | 2.3298(11)                                                                        |
|                   |           |                                        |                                                 | 2.350(3)                                                                      | 2.342(3)                                                                      |                                                                                   |
|                   |           |                                        |                                                 | 2.349(3)                                                                      | 2.342(3)                                                                      |                                                                                   |
|                   |           |                                        |                                                 | 2.343(3)                                                                      | 2.339(3)                                                                      |                                                                                   |
| P3–P4             | 2.2095(8) | 2.2379                                 | 2.2007(12)                                      | 2.183(3)                                                                      | 2.188(3)                                                                      | 2.1949(13)                                                                        |
|                   |           |                                        |                                                 | 2.200(3)                                                                      | 2.195(3)                                                                      |                                                                                   |
|                   |           |                                        |                                                 | 2.205(3)                                                                      | 2.199(3)                                                                      |                                                                                   |
|                   |           |                                        |                                                 | 2.202(3)                                                                      | 2.210(3)                                                                      |                                                                                   |
| P1–P2–P2'–<br>P1' | 37.36(3)  | 0.0                                    | 0.0                                             | 5.24(10)                                                                      | 8.49(13)                                                                      | 43.76(5)                                                                          |
|                   |           |                                        |                                                 | 13.84(10)                                                                     | 4.16(11)                                                                      |                                                                                   |

a)  $[\text{Cu}(\text{P}_4)_2][\text{Al}(\text{OR}^{\text{F}})_4]$  and  $[\text{Ag}(\text{P}_4)_2][\text{Al}(\text{OR}^{\text{F}})_4]$  contain two crystallographically independent  $[\text{M}(\text{P}_4)_2]^+$  cations with a total of 8 different M–P bonds.

It is noteworthy that the P1-P2-P2'-P1' torsion angle between the two P<sub>4</sub> molecules is highly sensitive towards the environment. In gas phase calculation (@B3LYP(D3BJ)/def2-TZVPP and r2scan-3c) and in the [Au(P<sub>4</sub>)<sub>2</sub>][GaCl<sub>4</sub>] salt, this torsion angle is close to 0°, resulting in an almost D<sub>2h</sub> symmetric [Au(P<sub>4</sub>)<sub>2</sub>]<sup>+</sup> molecule. In the similar [Ag(P<sub>4</sub>)<sub>2</sub>][Al(OR<sup>F</sup>)<sub>4</sub>] and [Cu(P<sub>4</sub>)<sub>2</sub>][Al(OR<sup>F</sup>)<sub>4</sub>] salts, this torsion angle ranges between 4.16(11)° and 13.84(10)°. <sup>32,34</sup> In contrast, the torsion angle amounts to 43.76(5)° in [Ag(P<sub>4</sub>)<sub>2</sub>][F{Al(OR<sup>F</sup>)<sub>3</sub>}<sub>2</sub>]<sup>33</sup> and 37.36(3)° in **2**, which reduces the symmetry of the [Au(P<sub>4</sub>)<sub>2</sub>]<sup>+</sup> cation to D<sub>2</sub>. The differences in the torsion angles are likely caused by crystal-packing effects and the interactions with the different anions [GaCl<sub>4</sub>]<sup>-</sup>, [Al(OR<sup>F</sup>)<sub>4</sub>]<sup>-</sup>, and [F{Al(OR<sup>F</sup>)<sub>3</sub>}<sub>2</sub>]<sup>-</sup>. In the gas phase, the energy difference Δ*E* between two conformers of the [Au(P<sub>4</sub>)<sub>2</sub>]<sup>+</sup> cation with a torsion angle of 0° and 90° amounts only to 0.8 kJ mol<sup>-1</sup> at the CCSD(T)/def2-QZVPP//r2scan-3c level of theory (Figure S 37).

### 6.3 Crystal structure of $[\text{Au}(\text{P}_4\text{S}_3)_2][\text{F}\{\text{Al}(\text{OR}^{\text{F}})_3\}_2]_3$ **3**

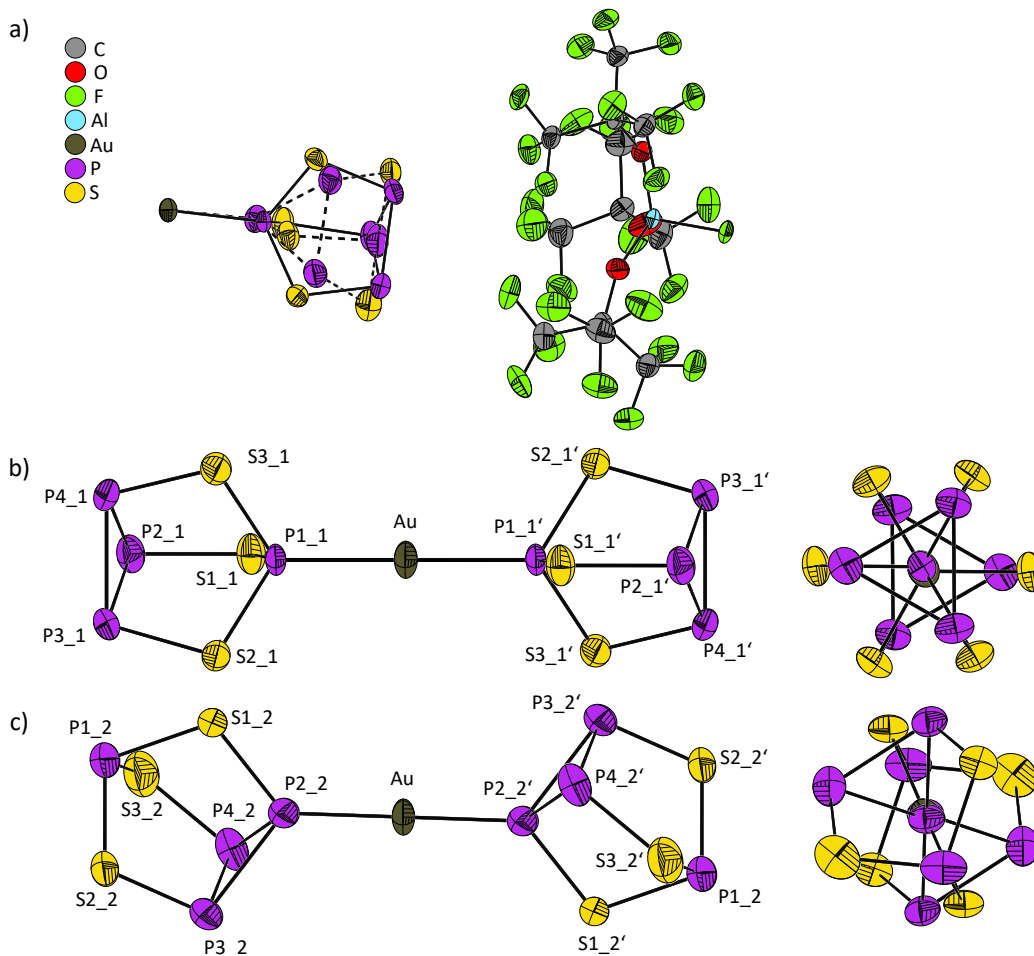

**Figure S 30:** Asymmetric unit of **3** containing a half anion and a half cation. The  $\text{P}_4\text{S}_3$  cage of the cation is disordered and coordinates with the apical phosphor atom (86%) or one of the basal phosphor atoms (14%). The minority part of disordered fragments is drawn with dashed bonds. **b)** Top and side view of the majority part of the  $[\text{Au}(\text{P}_4\text{S}_3)_2]^+$  cation in **3**. **c)** Top and side view of the minority part of the  $[\text{Au}(\text{P}_4\text{S}_3)_2]^+$  cation in **3**. Thermal ellipsoids are shown at the 50% probability level.

**Table S 8:** Experimental bond lengths [ $\text{\AA}$ ] of the  $[\text{Au}(\text{P}_4\text{S}_3)_2]^+$  cation in **3** together with calculated values at the B3LYP(D3BJ)/def2-TZVPP level of theory.

| Apical coordination (majority part) |            |                                               | Basal coordination (minority part) |           |                                               |
|-------------------------------------|------------|-----------------------------------------------|------------------------------------|-----------|-----------------------------------------------|
|                                     | <b>3</b>   | calc. $[\text{Au}(\text{P}_4\text{S}_3)_2]^+$ |                                    | <b>3</b>  | calc. $[\text{Au}(\text{P}_4\text{S}_3)_2]^+$ |
| Au–P1_1                             | 2.301(3)   | 2.327                                         | Au–P2_2                            | 2.14(2)   | 2.324                                         |
| P1_1–S1_1                           | 2.059(3)   | 2.088                                         | P1_2–S1_2                          | 2.12(3)   | 2.140                                         |
| P1_1–S2_1                           | 2.057(3)   | 2.088                                         | P1_2–S2_2                          | 2.05(2)   | 2.130                                         |
| P1_1–S3_1                           | 2.069(6)   | 2.088                                         | P1_2–S3_2                          | 2.01(2)   | 2.130                                         |
| P2_1–S1_1                           | 2.0897(18) | 2.119                                         | P2_2–S1_2                          | 2.09(4)   | 2.077                                         |
| P3_1–S2_1                           | 2.0903(19) | 2.119                                         | P3_2–S2_2                          | 2.068(12) | 2.099                                         |
| P4_1–S3_1                           | 2.094(4)   | 2.119                                         | P4_2–S3_2                          | 2.089(14) | 2.099                                         |
| P2_1–P3_1                           | 2.239(2)   | 2.269                                         | P2_2–P3_2                          | 2.26(2)   | 2.229                                         |
| P3_1–P4_1                           | 2.243(3)   | 2.269                                         | P3_2–P4_2                          | 2.216(18) | 2.291                                         |
| P4_1–P2_1                           | 2.254(3)   | 2.269                                         | P4_2–P2_2                          | 2.25(2)   | 2.229                                         |

**Table S 9:** Comparison of the average bond lengths [Å] of the  $[\text{Au}(\text{P}_4\text{S}_3)_2]^+$  cation in **3** with different literature-known complexes and free  $\text{P}_4\text{S}_3$ .

|                                            | <b>3</b>              |                      | <b>[Ag(P<sub>4</sub>S<sub>3</sub>)<sub>2</sub>]</b>  | <b>[Ag(P<sub>4</sub>S<sub>3</sub>)]</b>                               | <b>[Fe(Cp)(P<sub>4</sub>S<sub>3</sub>)]</b>                         | <b>γ-P<sub>4</sub>S<sub>3</sub><sup>35</sup></b> | <b>α-P<sub>4</sub>S<sub>3</sub><sup>35</sup></b> |
|--------------------------------------------|-----------------------|----------------------|------------------------------------------------------|-----------------------------------------------------------------------|---------------------------------------------------------------------|--------------------------------------------------|--------------------------------------------------|
|                                            | <b>major</b>          | <b>minor</b>         | <b>[Al(OR<sup>F</sup>)<sub>4</sub>]<sup>35</sup></b> | <b>[Al(OCH(CF<sub>3</sub>)<sub>2</sub>)<sub>4</sub>]<sup>35</sup></b> | <b>[F{Al(OR<sup>F</sup>)<sub>3</sub>}<sub>2</sub>]<sup>36</sup></b> |                                                  |                                                  |
| av. M–P <sub>basal</sub>                   | –                     | 2.14(2) <sup>b</sup> | 2.529(9)                                             | 2.5471(8)                                                             | 2.1978(7) <sup>b</sup>                                              |                                                  |                                                  |
| av. M–P <sub>apical</sub>                  | 2.301(3) <sup>b</sup> | –                    | –                                                    | 2.459(2)                                                              | –                                                                   |                                                  |                                                  |
| av. M–S                                    | –                     | –                    | 2.6573(11) <sup>b</sup>                              | –                                                                     | –                                                                   |                                                  |                                                  |
| av. P <sub>basal</sub> –P <sub>basal</sub> | 2.245(8)              | 2.242(13)            | 2.237(5)                                             | 2.238(4)                                                              | 2.226(16)                                                           | 2.241(4)                                         | 2.2424(14)                                       |
| av. P <sub>basal</sub> –S                  | 2.0913(13)            | 2.082(8)             | 2.083(4)                                             | 2.101(3)                                                              | 2.074(4)                                                            | 2.10553(3)                                       | 2.0992(16)                                       |
| av. P <sub>apical</sub> –S                 | 2.062(4)              | 2.06(3)              | 2.112(4)                                             | 2.091(2)                                                              | 2.107(5)                                                            | 2.1082(12)                                       | 2.1104(17)                                       |

## 6.4 Crystal structure of $[\text{Au}(\text{C}_6\text{H}_6)(\text{CO})][\text{F}\{\text{Al}(\text{OR}^{\text{F}})_3\}_2] \mathbf{4}$

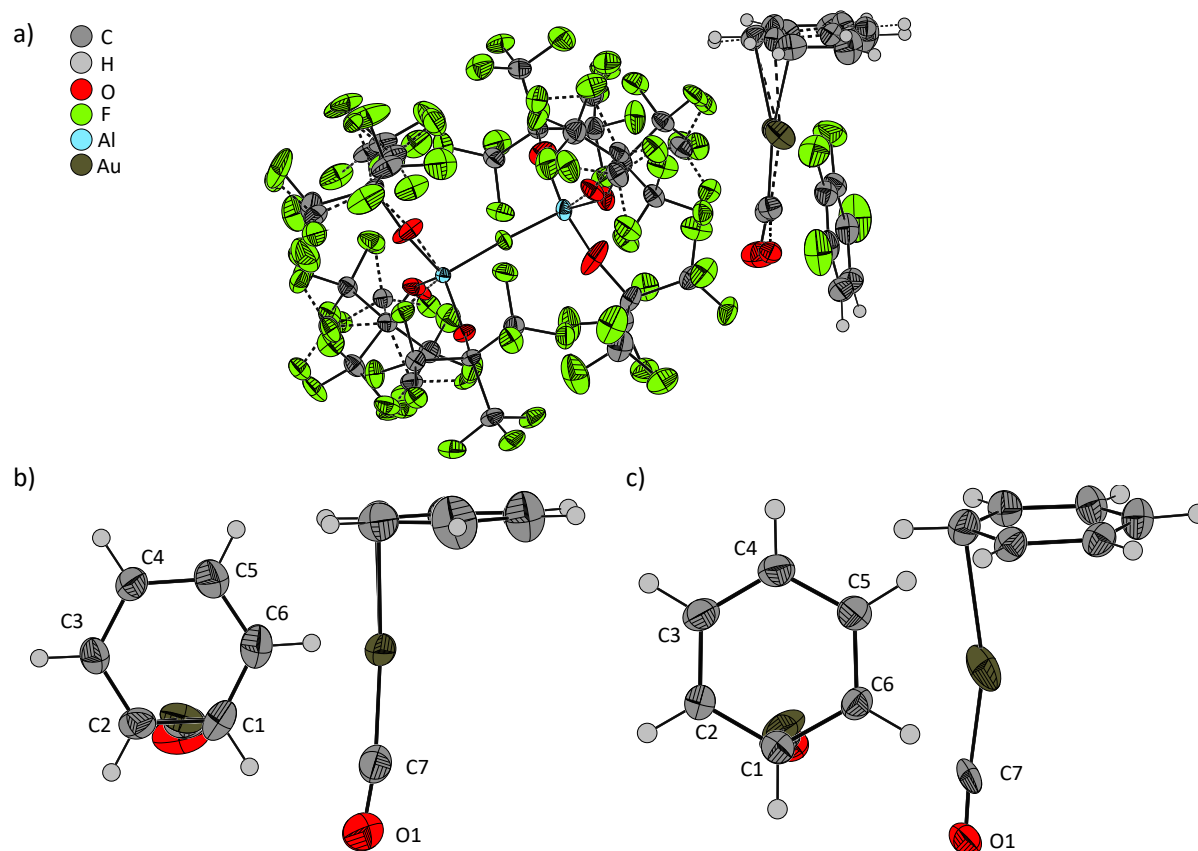

**Figure S 31:** **a)** Asymmetric unit of **4** containing one disordered cation (occupation 70%/30%) and one anion. The minority part of disordered fragments is drawn with dashed bonds. **b)** Top and side view of the majority part of the  $[\text{Au}(\text{C}_6\text{H}_6)(\text{CO})]^+$  cation in **4**. **c)** Top and side view of the minority part of the  $[\text{Au}(\text{C}_6\text{H}_6)(\text{CO})]^+$  cation in **4**. Thermal ellipsoids are shown at the 50% probability level.

**Table S 10:** Experimental bond lengths [ $\text{\AA}$ ] and angles [ $^\circ$ ] of the  $[\text{Au}(\text{C}_6\text{H}_6)(\text{CO})]^+$  cations in **4** together with calculated values at the B3LYP(D3BJ)/def2-TZVPP level of theory.

|          | <b>4</b>      | <b>4</b>      |                                                        |
|----------|---------------|---------------|--------------------------------------------------------|
|          | majority part | minority part | calc. $[\text{Au}(\text{C}_6\text{H}_6)(\text{CO})]^+$ |
| Au–C1    | 2.228(8)      | 2.394(16)     | 2.223                                                  |
| Au–C2    | 2.312(7)      | 2.554(18)     | 2.680                                                  |
| Au–C3    | 2.908(8)      | 3.083(18)     | 3.381                                                  |
| Au–C4    | 3.361(88)     | 3.454(17)     | 3.682                                                  |
| Au–C5    | 3.313(8)      | 3.352(13)     | 3.381                                                  |
| Au–C6    | 2.777(9)      | 2.851(11)     | 2.680                                                  |
| Au–C7    | 1.911(9)      | 1.884(17)     | 1.954                                                  |
| C7–O1    | 1.151(13)     | 1.02(2)       | 1.120                                                  |
| Au–C7–O1 | 171(2)        | 169(4)        | 179.0                                                  |

## 7. Cyclic Voltammetry

Cyclic voltammetry was performed with a BioLogic VMP3 potentiostat inside a glovebox. The cyclic voltammograms of **1** and **2** were measured with a gold disc working electrode ( $d = 0.5$  mm), a platinum wire as counter electrode and a platinum wire as quasi-reference electrode. All used solutions contained  $[\text{NBu}_4][\text{Al}(\text{OR}^{\text{F}})_4]$  (100 mM) as conducting salt. The measurements were performed with a solution of the sample (10 mM) in 4FB (**1**, Figure S 32) or 5FB (**2**, Figure S 33) and different scan rates. After the measurement of the pure sample,  $[\text{Fc}][\text{Al}(\text{OR}^{\text{F}})_4]$  (10mM) was added as an internal reference. In both cases, the oxidative and reductive process are coupled, as the oxidation is only observed if a reduction occurred first. However, due to the large separation of the anodic and cathodic peak potentials (0.39 V (**1**) or 0.80 V (**2**)) and the unusual shape of the cyclic voltammograms, we did not determine a half-wave potential and only report the peak potentials and currents (Table S 11). This large separation indicates that either the electron transfer reaction is quite slow, or more likely, that the electron transfer is coupled with a chemical reaction. In this case, the neutral  $[\text{Au}(\text{L})_2]^0$  ( $\text{L} = \text{Co}, \text{P}_4$ ) complexes are likely not stable under these conditions at RT and (partial) ligand dissociation occurs. This conclusion is supported by the significantly smaller anodic peak current compared to the corresponding cathodic peak current in the CV of **2** and the considerably reduced bond dissociation Gibbs free energies of  $[\text{Au}(\text{L})_2]^0$  ( $\text{L} = \text{Co}$ :  $20 \text{ kJ mol}^{-1}$ ,  $\text{L} = \text{P}_4$ :  $108 \text{ kJ mol}^{-1}$ ) compared to  $[\text{Au}(\text{L})_2]^+$  ( $\text{L} = \text{Co}$ :  $325 \text{ kJ mol}^{-1}$ ,  $\text{L} = \text{P}_4$ :  $428 \text{ kJ mol}^{-1}$ ) (@DLPNO-CCSD(T)/def2-QZVPP//r2scan-3c, see Table S 14).

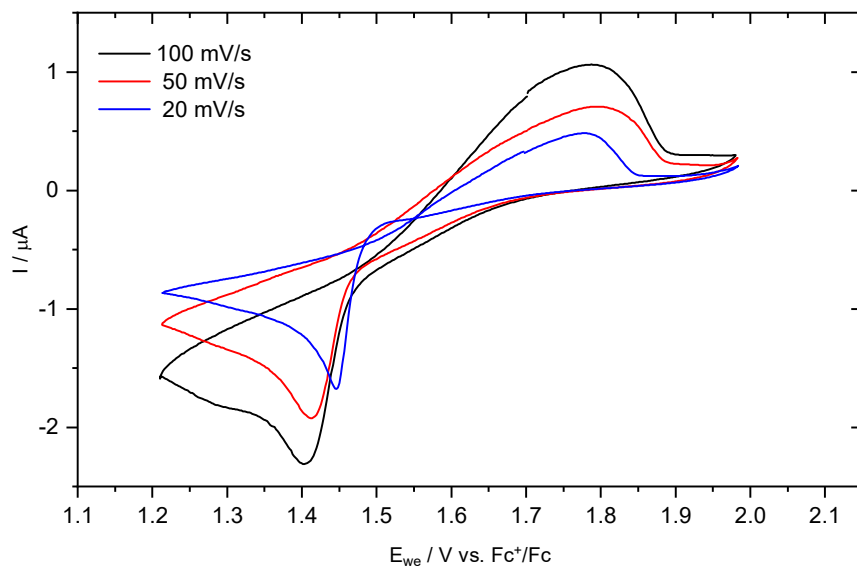

**Figure S 32:** Experimental cyclic voltammograms of **1** (10 mM) in 4FB at different scan rates.

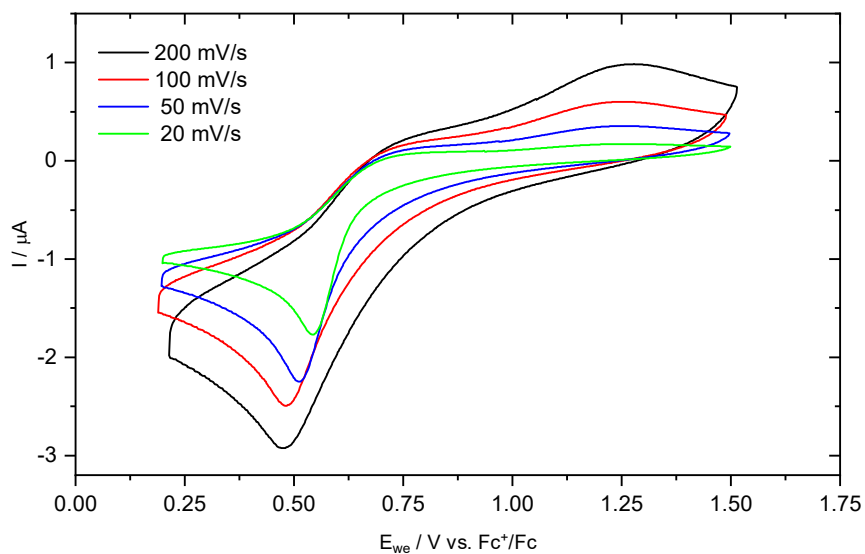

**Figure S 33:** Experimental cyclic voltammograms of **2** (10 mM) in 4FB at different scan rates.

**Table S 11:** Anodic and cathodic peak potentials vs.  $Fc^+/Fc$  and currents obtained by cyclic voltammetry of **1** and **2** at different scan rates.

| $u / \text{mV s}^{-1}$ | <b>1</b>            |                        |                     |                        | <b>2</b>            |                        |                     |                        |
|------------------------|---------------------|------------------------|---------------------|------------------------|---------------------|------------------------|---------------------|------------------------|
|                        | $E_{pc} / \text{V}$ | $I_{pc} / \mu\text{A}$ | $E_{pa} / \text{V}$ | $I_{pa} / \mu\text{A}$ | $E_{pc} / \text{V}$ | $I_{pc} / \mu\text{A}$ | $E_{pa} / \text{V}$ | $I_{pa} / \mu\text{A}$ |
| 20                     | 1.446               | -1.678                 | 1.779               | 0.4826                 | 0.543               | -1.769                 | 1.256               | 0.1719                 |
| 50                     | 1.413               | -1.922                 | 1.794               | 0.7077                 | 0.511               | -2.247                 | 1.255               | 0.3550                 |
| 100                    | 1.403               | -2.311                 | 1.787               | 1.062                  | 0.484               | -2.494                 | 1.256               | 0.6027                 |
| 200                    |                     |                        |                     |                        | 0.477               | -2.927                 | 1.278               | 0.9852                 |



## 8. Powder XRD Data

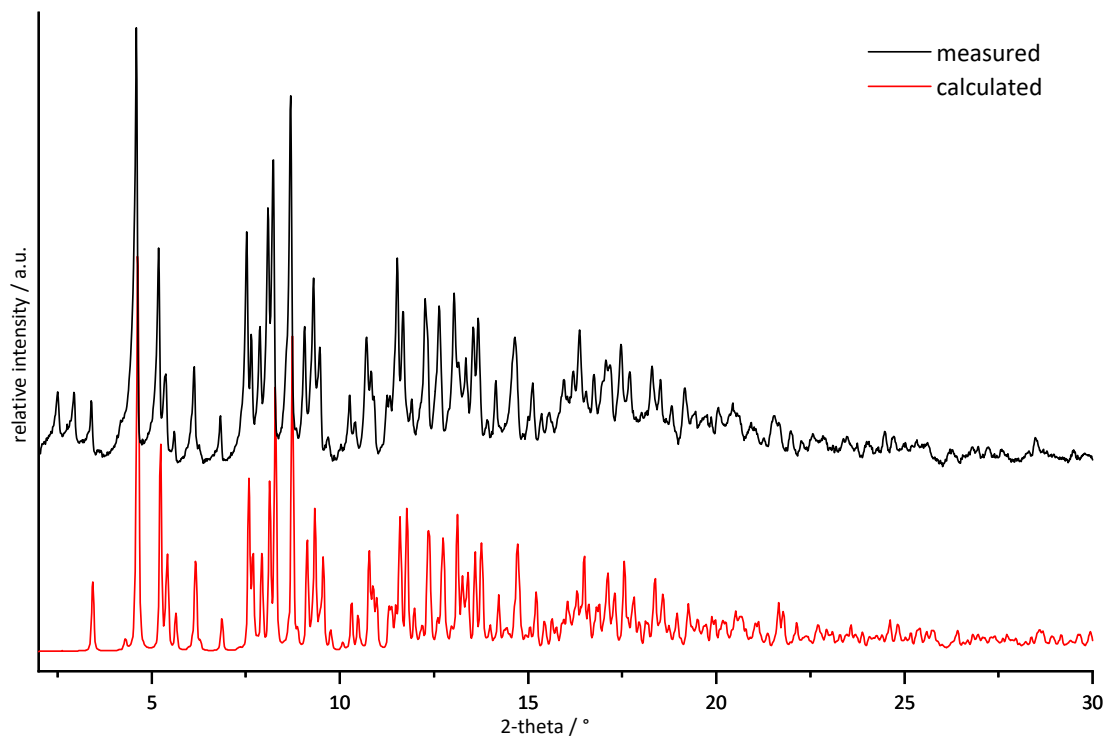

**Figure S6-3:** Measured powder XRD data of bulk material of **1** at 100 K (black) and calculated powder diffraction pattern, simulated with single-crystal data of **1** (red).

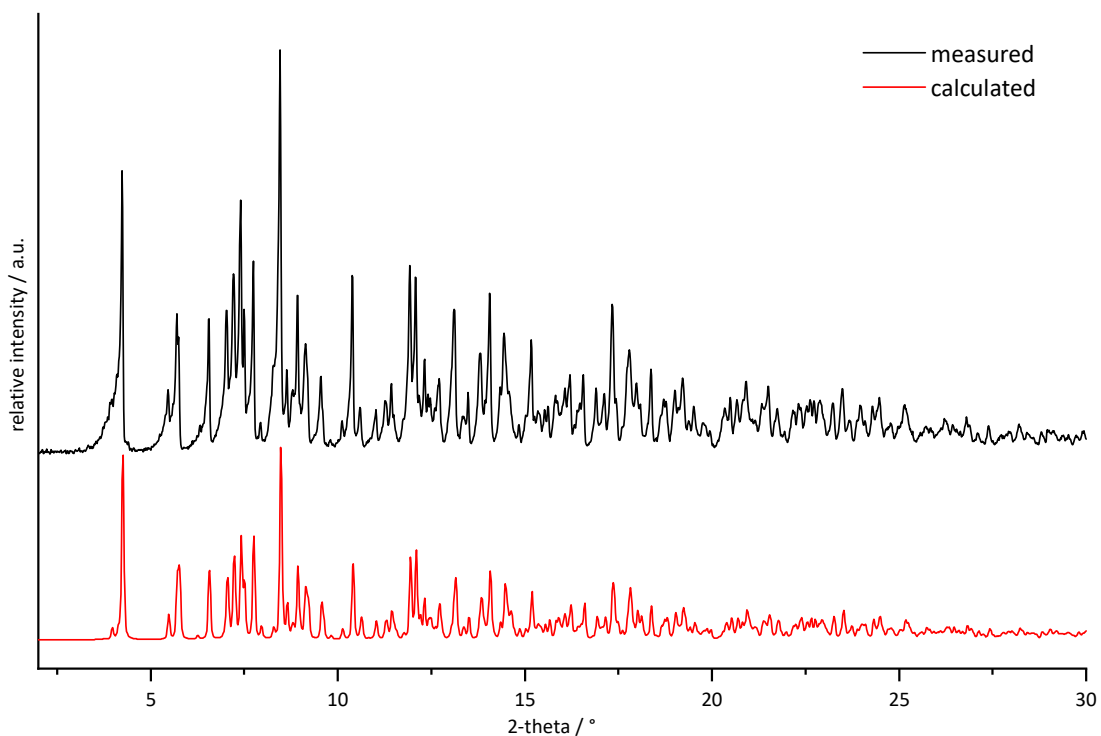

**Figure S34:** Measured powder XRD data of bulk material of **2** at 100 K (black) and calculated powder diffraction pattern, simulated with single-crystal data of **2** (red).

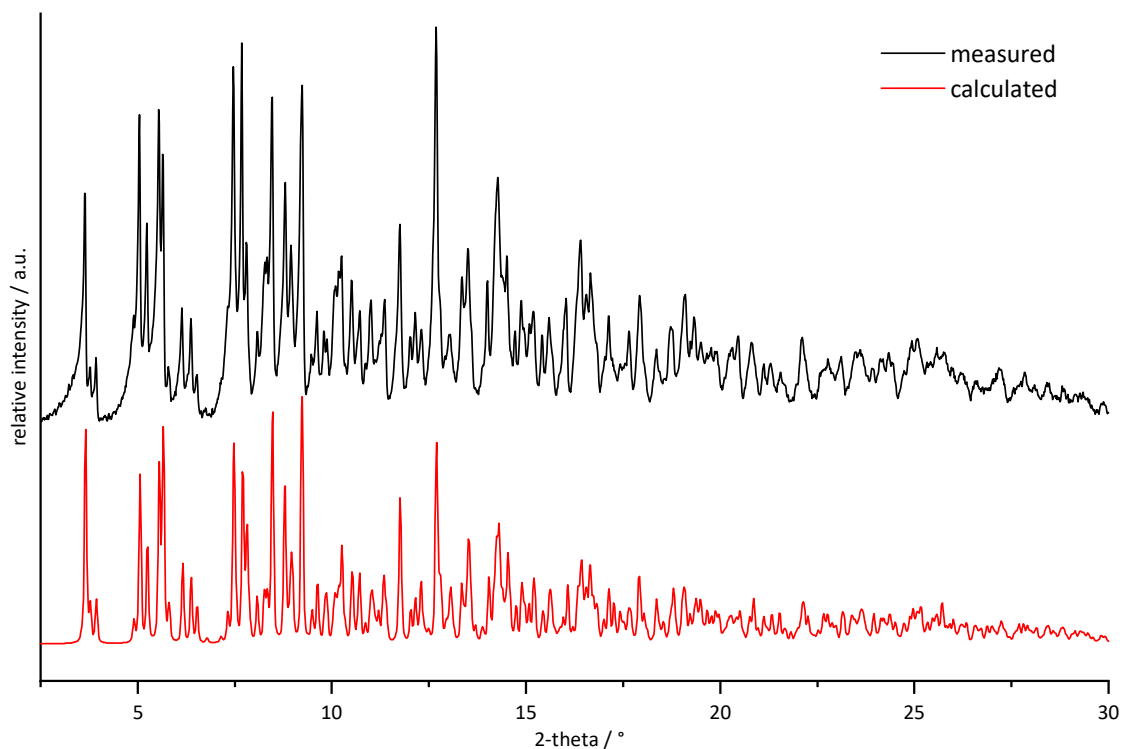

**Figure S35:** Measured powder XRD data of bulk material of **3** at 100 K (black) and calculated powder diffraction pattern, simulated with single-crystal data of **3** (red).

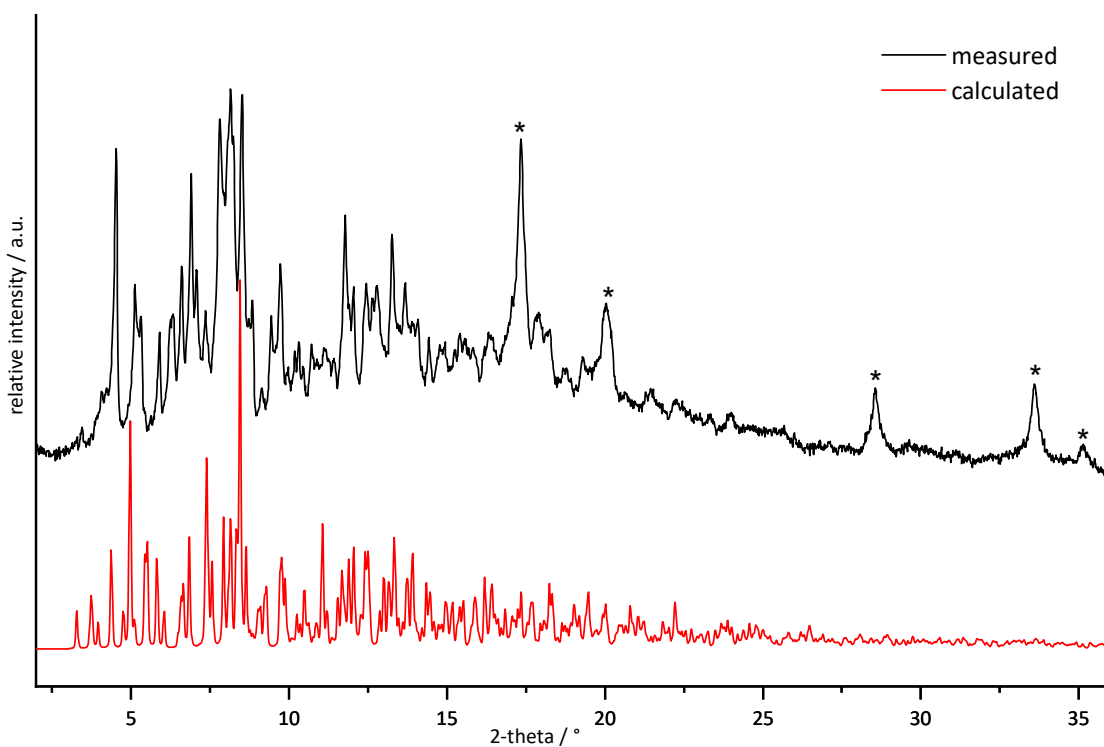

**Figure S36:** Measured powder XRD data of bulk material of **4** at 100 K (black) and calculated powder diffraction pattern, simulated with single-crystal data of **4** (red). The measured and simulated powder XRD show some serious discrepancies, which are likely caused by the decomposition of compound during sample preparation at RT. The reflexes marked with an asterisk can be assigned to elemental gold (PDF-# 04-0784).

## 9. Quantum-Chemical Calculations

**Table S 12:** Summary of thermodynamic data calculated at the DLPNO-CCSD(T)/def2-QZVPP//r2scan-3c levels of theory.

|                                                                           | $E^0$ (r2scan-3c)<br>/ H | $H^0$ (r2scan-3c) <sup>a</sup><br>/ H | $G^0$ ( r2scan-3c) <sup>a</sup><br>/ H | $E^0$ (DLPNO-CCSD(T))<br>/ H | T1 diag.<br>(DLPNO-CCSD(T)) |
|---------------------------------------------------------------------------|--------------------------|---------------------------------------|----------------------------------------|------------------------------|-----------------------------|
| [Cu] <sup>0</sup>                                                         | -1640.4553               | -1640.4530                            | -1640.4712                             | -1639.7254                   | 0.018                       |
| [Cu] <sup>+</sup>                                                         | -1640.1696               | -1640.1672                            | -1640.1854                             | -1639.4540                   | 0.012                       |
| [Ag] <sup>0</sup>                                                         | -147.0158                | -147.0135                             | -147.0325                              | -146.8357                    | 0.013                       |
| [Ag] <sup>+</sup>                                                         | -146.7266                | -146.7243                             | -146.7432                              | -146.5610                    | 0.005                       |
| [Au] <sup>0</sup>                                                         | -135.7550                | -135.7526                             | -135.7725                              | -135.4254                    | 0.012                       |
| [Au] <sup>+</sup>                                                         | -135.4062                | -135.4039                             | -135.4237                              | -135.0923                    | 0.006                       |
| [Cu(CO) <sub>2</sub> ] <sup>+</sup>                                       | -1866.8999               | -1866.8775                            | -1866.9124                             | -1865.9368                   | 0.019                       |
| [Au(CO) <sub>2</sub> ] <sup>0</sup>                                       | -373.4156                | -373.3936                             | -373.4299                              | -373.0155                    | 0.015                       |
| [Au(CO) <sub>2</sub> ] <sup>+</sup>                                       | -362.1715                | -362.1488                             | -362.1840                              | -361.6226                    | 0.016                       |
| CO                                                                        | -113.2936                | -113.2853                             | -113.3077                              | -113.1867                    | 0.018                       |
| [Cu(N <sub>2</sub> ) <sub>2</sub> ] <sup>+</sup>                          | -1859.2805               | -1859.2577                            | -1859.2928                             | -1858.3335                   | 0.016                       |
| [Ag(N <sub>2</sub> ) <sub>2</sub> ] <sup>+</sup>                          | -365.7973                | -365.7749                             | -365.8128                              | -365.4132                    | 0.012                       |
| [Au(N <sub>2</sub> ) <sub>2</sub> ] <sup>+</sup>                          | -354.5235                | -354.5006                             | -354.5365                              | -353.9898                    | 0.013                       |
| N <sub>2</sub>                                                            | -109.5071                | -109.4982                             | -109.5199                              | -109.4033                    | 0.013                       |
| Cl <sub>2</sub>                                                           | -920.3153                | -920.3106                             | -920.3360                              | -919.4795                    | 0.009                       |
| Cl <sup>-</sup>                                                           | -460.2381                | -460.2357                             | -460.2532                              | -459.8229                    | 0.003                       |
| Br <sub>2</sub>                                                           | -5148.2626               | -5148.2582                            | -5148.2861                             | -5146.0932                   | 0.007                       |
| Br <sup>-</sup>                                                           | -2574.2161               | -2574.2138                            | -2574.2323                             | -2573.1302                   | 0.005                       |
| I <sub>2</sub>                                                            | -595.4866                | -595.4823                             | -595.5119                              | -594.6012                    | 0.007                       |
| I <sup>-</sup>                                                            | -297.8279                | -297.8255                             | -297.8447                              | -297.3827                    | 0.006                       |
| [Au(P <sub>4</sub> ) <sub>2</sub> ] <sup>0</sup> (0° angle)               | -2866.6364               | -2866.6088                            | -2866.6625                             | -2863.0042                   | 0.017                       |
| [Au(P <sub>4</sub> ) <sub>2</sub> ] <sup>+</sup> (0° angle)               | -2866.41640              | -2866.3884                            | -2866.4421                             | -2862.7933                   | 0.015                       |
| [Au(P <sub>4</sub> ) <sub>2</sub> ] <sup>+</sup> (90° angle) <sup>b</sup> | -2866.4150               | -2866.3880                            | -2866.4405                             | -2862.7930                   | 0.016                       |
| P <sub>4</sub>                                                            | -1365.3954               | -1365.3837                            | -1365.4155                             | -1363.7531                   | 0.017                       |
| [Au(P <sub>4</sub> S <sub>3</sub> ) <sub>2</sub> ] <sup>+</sup> (apical)  | -5255.6567               | -5255.6084                            | -5255.6798                             | -5249.5420                   | 0.018                       |
| [Au(P <sub>4</sub> S <sub>3</sub> ) <sub>2</sub> ] <sup>+</sup> (basal)   | -5255.6547               | -5255.6066                            | -5255.6786                             | -5249.5375                   | 0.018                       |
| P <sub>4</sub> S <sub>3</sub>                                             | -2560.0142               | -2559.9927                            | -2560.0359                             | -2557.1217                   | 0.020                       |

- a)  $E_{vrt}$  of a single atom equals  $\frac{3}{2}RT$ . The standard entropy of atoms was calculated with the Sackur-Tetrode equation.<sup>37</sup>  
b) [Au(P<sub>4</sub>)<sub>2</sub>]<sup>+</sup> (90° angle) is a transition state with one imaginary mode of  $-5.9 \text{ cm}^{-1}$ .

**Table S 13:** Summary of thermodynamic data calculated at the B3LYP(D3BJ)/def2-TZVPP levels of theory.

|                                                                          | $E_{\text{scr}}(\text{B3LYP})$<br>/ H | $E_{\text{vrt}}(\text{B3LYP})$<br>/ kJ mol <sup>-1</sup> | $S^\circ(\text{B3LYP})$<br>/ kJ mol <sup>-1</sup> K <sup>-1</sup> | $G^\circ(\text{B3LYP})$<br>/ kJ mol <sup>-1</sup> | $H^\circ(\text{B3LYP})$<br>/ kJ mol <sup>-1</sup> | $E^\circ(\text{B3LYP})$<br>/ kJ mol <sup>-1</sup> |
|--------------------------------------------------------------------------|---------------------------------------|----------------------------------------------------------|-------------------------------------------------------------------|---------------------------------------------------|---------------------------------------------------|---------------------------------------------------|
| [Au] <sup>0 a</sup>                                                      | -135.6905                             | 3.7                                                      | 0.1747                                                            | -356301.2                                         | -356249.1                                         | -356255.3                                         |
| [Au] <sup>+ a</sup>                                                      | -135.3477                             | 3.7                                                      | 0.1747                                                            | -355401.2                                         | -355349.1                                         | -355355.3                                         |
| [Au(CO) <sub>2</sub> ] <sup>+</sup>                                      | -362.1309                             | 57.3                                                     | 0.3164                                                            | -950809.1                                         | -950714.8                                         | -950774.6                                         |
| CO                                                                       | -113.3111                             | 19.4                                                     | 0.1977                                                            | -297535.2                                         | -297476.3                                         | -297498.2                                         |
| [Au(P <sub>4</sub> ) <sub>2</sub> ] <sup>+</sup> (0° angle)              | -2866.2690                            | 70.66                                                    | 0.5071                                                            | -7525465.9                                        | -7525314.7                                        | -7525387.8                                        |
| [Au(P <sub>4</sub> S <sub>3</sub> ) <sub>2</sub> ] <sup>+</sup> (apical) | -5255.4712                            | 124.6                                                    | 0.6745                                                            | -13798311.0                                       | -13798109.9                                       | -13798237.0                                       |
| [Au(P <sub>4</sub> S <sub>3</sub> ) <sub>2</sub> ] <sup>+</sup> (basal)  | -5255.4690                            | 124.3                                                    | 0.6832                                                            | -13798308.1                                       | -13798104.4                                       | -13798231.1                                       |
| [Au(C <sub>6</sub> Me <sub>6</sub> ) <sub>2</sub> ] <sup>+</sup>         | -1071.6348                            | 1488.0                                                   | 0.8717                                                            | -2812346.2                                        | -2812086.3                                        | -2813576.7                                        |
| [Au(C <sub>6</sub> Me <sub>6</sub> )(CO)] <sup>+</sup>                   | -716.8966041                          | 770.92                                                   | 0.59506                                                           | -1881615.69                                       | -1881438.28                                       | -1882211.68                                       |
| C <sub>6</sub> Me <sub>6</sub>                                           | -468.0395                             | 736.1                                                    | 0.4965                                                            | -1228246.8                                        | -1228098.7                                        | -1228837.4                                        |
| [C <sub>6</sub> Me <sub>6</sub> ] <sup>+</sup>                           | -467.7664                             | 732.1                                                    | 0.4933                                                            | -1227533.0                                        | -1227386.0                                        | -1228120.5                                        |
| [Au(Mes) <sub>2</sub> ] <sup>+</sup>                                     | -835.8075                             | 1025.3                                                   | 0.7205                                                            | -2193599.2                                        | -2193384.4                                        | -2194412.2                                        |
| [Au(Mes)(CO)] <sup>+</sup>                                               | -598.9815959                          | 540.74                                                   | 0.51988                                                           | -1572237.66                                       | -1572082.66                                       | -1572625.88                                       |
| Mes                                                                      | -350.1298                             | 503.9                                                    | 0.4187                                                            | -918884.1                                         | -918759.2                                         | -919265.6                                         |
| [Mes] <sup>+</sup>                                                       | -349.8323                             | 499.0                                                    | 0.4076                                                            | -918104.5                                         | -917982.9                                         | -918484.4                                         |
| [Au(C <sub>6</sub> H <sub>6</sub> ) <sub>2</sub> ] <sup>+</sup>          | -599.9338                             | 567.2                                                    | 0.5038                                                            | -1574706.4                                        | -1574556.2                                        | -1575126.0                                        |
| [Au(C <sub>6</sub> H <sub>6</sub> )(CO)] <sup>+</sup>                    | -481.0406618                          | 311.82                                                   | 0.41369                                                           | -1262781.06                                       | -1262657.72                                       | -1262972.02                                       |
| C <sub>6</sub> H <sub>6</sub>                                            | -232.2050                             | 275.1                                                    | 0.2683                                                            | -609456.4                                         | -609376.5                                         | -609654.0                                         |
| [C <sub>6</sub> H <sub>6</sub> ] <sup>+</sup>                            | -231.8733                             | 270.2                                                    | 0.3018                                                            | -608600.6                                         | -608510.6                                         | -608783.3                                         |
| [Au( <i>o</i> -dfb) <sub>2</sub> ] <sup>+</sup>                          | -996.9063                             | 489.2                                                    | 0.5800                                                            | -2617058.3                                        | -2616885.4                                        | -2617377.1                                        |
| [Au( <i>o</i> -dfb)(CO)] <sup>+</sup>                                    | -679.5250517                          | 272.88                                                   | 0.45012                                                           | -1783951.53                                       | -1783817.32                                       | -1784092.68                                       |
| <i>o</i> -dfb                                                            | -430.6997                             | 236.4                                                    | 0.3206                                                            | -1130658.5                                        | -1130562.9                                        | -1130801.8                                        |
| [ <i>o</i> -dfb] <sup>+</sup>                                            | -430.3696                             | 235.7                                                    | 0.3253                                                            | -1129793.9                                        | -1129696.9                                        | -1129935.1                                        |
| [Au(4FB) <sub>2</sub> ] <sup>+</sup>                                     | -1393.8538                            | 412.9                                                    | 0.6569                                                            | -3659342.9                                        | -3659147.0                                        | -3659562.4                                        |
| [Au(4FB)(CO)] <sup>+</sup>                                               | -877.9972723                          | 234.62                                                   | 0.48624                                                           | -2305089.27                                       | -2304944.30                                       | -2305181.4                                        |
| 4FB                                                                      | -629.1838                             | 198.4                                                    | 0.3580                                                            | -1651827.7                                        | -1651720.9                                        | -1651921.8                                        |
| [4FB] <sup>+</sup>                                                       | -628.8459                             | 198.3                                                    | 0.3683                                                            | -1650943.5                                        | -1650833.7                                        | -1651034.5                                        |

a)  $E_{\text{vrt}}$  of a single atom equals  $\frac{3}{2}RT$ . The standard entropy of atoms was calculated with the Sackur-Tetrode equation.<sup>37</sup>

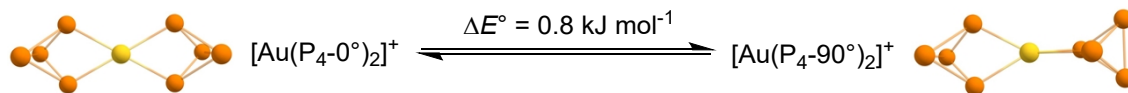

**Figure S 37:** Calculated structures and energy difference between two conformers of the  $[\text{Au}(\text{P}_4)_2]^+$  cation with a torsion angle of  $0^\circ$  or  $90^\circ$  at the DLPNO-CCSD(T)/def2-QZVPP//r2scan-3c level of theory. The  $90^\circ$  structure has an imaginary mode of  $-6 \text{ cm}^{-1}$ .

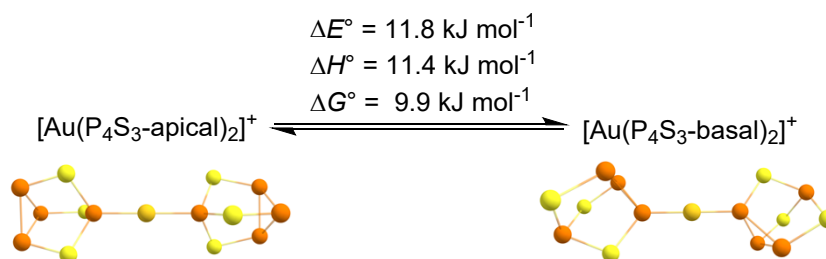

**Figure S 38:** Calculated structures and thermodynamics for the different coordination isomers of  $[\text{Au}(\text{P}_4\text{S}_3)_2]^+$  at the DLPNO-CCSD(T)/def2-QZVPP//r2scan-3c level of theory.

**Table S 14:** Reaction energy, enthalpy, and Gibbs free energy for the dissociation of all ligands at the DLPNO-CCSD(T)/def2-QZVPP//r2scan-3c level of theory according to  $[\text{Au}(\text{L})_n]^m \rightarrow [\text{Au}]^m + n \text{ L}$ .

|                               | $\Delta_{\text{R}}G /$<br>$\text{kJ mol}^{-1}$ | $\Delta_{\text{R}}H /$<br>$\text{kJ mol}^{-1}$ | $\Delta_{\text{R}}E /$<br>$\text{kJ mol}^{-1}$ |
|-------------------------------|------------------------------------------------|------------------------------------------------|------------------------------------------------|
| $[\text{Au}(\text{CO})_2]^+$  | 324.7                                          | 402.3                                          | 412.0                                          |
| $[\text{Au}(\text{CO})_2]^0$  | 19.8                                           | 86.8                                           | 91.2                                           |
| $[\text{Au}(\text{P}_4)_2]^+$ | 427.6                                          | 505.3                                          | 511.5                                          |
| $[\text{Au}(\text{P}_4)_2]^0$ | 107.6                                          | 185.3                                          | 190.6                                          |

**Table S 15:** Reaction energy, enthalpy, and Gibbs free energy for the dissociation of all ligands at the DLPNO-CCSD(T)/def2-QZVPP//r2scan-3c level of theory according to  $[\text{M}(\text{N}_2)_2]^+ \rightarrow [\text{M}]^+ + 2 \text{ N}_2$ .

|                               | $\Delta_{\text{R}}G /$<br>$\text{kJ mol}^{-1}$ | $\Delta_{\text{R}}H /$<br>$\text{kJ mol}^{-1}$ | $\Delta_{\text{R}}E /$<br>$\text{kJ mol}^{-1}$ |
|-------------------------------|------------------------------------------------|------------------------------------------------|------------------------------------------------|
| $[\text{Au}(\text{N}_2)_2]^+$ | 159.1                                          | 231.1                                          | 238.5                                          |
| $[\text{Ag}(\text{N}_2)_2]^+$ | 49.1                                           | 113.5                                          | 119.6                                          |
| $[\text{Cu}(\text{N}_2)_2]^+$ | 114.1                                          | 184.1                                          | 191.1                                          |

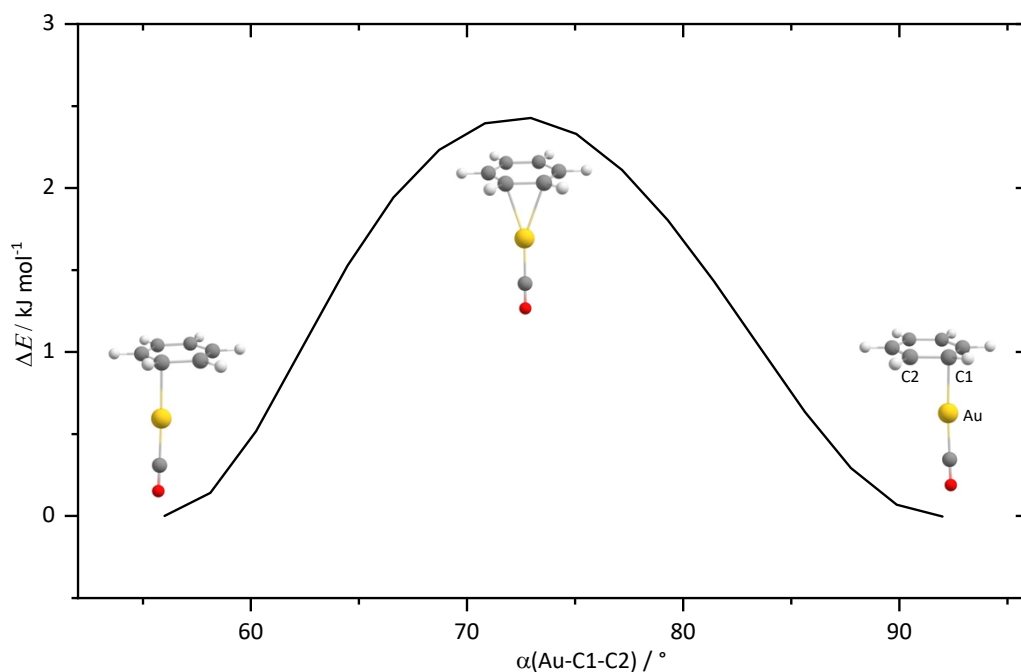

**Figure S 39:** Relaxed surface scan along the Au–C1–C2 angle at the B3LYP(D3BJ)/def2-TZVPP level of theory. This scan describes the transition  $[\text{Au}(\eta^1\text{-C}_6\text{H}_6)(\text{CO})]^+ \rightarrow [\text{Au}(\eta^2\text{-C}_6\text{H}_6)(\text{CO})]^+ \rightarrow [\text{Au}(\eta^1\text{-C}_6\text{H}_6)(\text{CO})]^+$ .

**Table S 16:** Reaction energy, enthalpy, and Gibbs free energy for the exchange of CO versus one or two arene ligands at the B3LYP(D3BJ)/def2-TZVPP level of theory according to  $[\text{Au}(\text{CO})_2]^+ + n \text{L} \rightarrow [\text{Au}(\text{L})_2(\text{CO})_{2-n}]^+ + n \text{CO}$ .

|                                                              | $\Delta_{\text{R}}G /$<br>$\text{kJ mol}^{-1}$ | $\Delta_{\text{R}}H /$<br>$\text{kJ mol}^{-1}$ | $\Delta_{\text{R}}E /$<br>$\text{kJ mol}^{-1}$ |
|--------------------------------------------------------------|------------------------------------------------|------------------------------------------------|------------------------------------------------|
| $[\text{Au}(\text{C}_6\text{Me}_6)(\text{CO})]^+ \text{[a]}$ | −95.0                                          | −101.0                                         | −97.9                                          |
| $[\text{Au}(\text{Mes})(\text{CO})]^+$                       | −79.7                                          | −84.9                                          | −83.8                                          |
| $[\text{Au}(\text{C}_6\text{H}_6)(\text{CO})]^+$             | −50.7                                          | −42.7                                          | −41.5                                          |
| $[\text{Au}(o\text{-dfb})(\text{CO})]^+$                     | −19.1                                          | −15.9                                          | −14.5                                          |
| $[\text{Au}(4\text{FB})(\text{CO})]^+$                       | 12.3                                           | 15.2                                           | 16.8                                           |
| $[\text{Au}(\text{C}_6\text{Me}_6)_2]^+$                     | −113.9                                         | −126.5                                         | −123.7                                         |
| $[\text{Au}(\text{Mes})_2]^+$                                | −92.4                                          | −103.7                                         | −102.6                                         |
| $[\text{Au}(\text{C}_6\text{H}_6)_2]^+$                      | −54.8                                          | −41.0                                          | −39.6                                          |
| $[\text{Au}(o\text{-dfb})_2]^+$                              | −2.6                                           | 2.7                                            | 4.7                                            |
| $[\text{Au}(4\text{FB})_2]^+$                                | 51.2                                           | 51.2                                           | 51.2                                           |

a) The  $[\text{Au}(\text{C}_6\text{Me}_6)(\text{CO})]^+$  cation has one imaginary frequency of  $-15 \text{ cm}^{-1}$ , which could not be removed.

**Table S 17:** Reaction energy, enthalpy, and Gibbs free energy for the decomposition of an  $[\text{Au}(\text{L})_n(\text{CO})_m]^+$  cation at the B3LYP(D3BJ)/def2-TZVPP level of theory according to  $[\text{Au}(\text{L})_n(\text{CO})_m]^+(\text{g}) \rightarrow \text{Au}^0(\text{s}) + m \text{CO} + (n-1) \text{L} + [\text{L}]^+$ .

|                                                               | $\Delta_{\text{R}}G /$<br>$\text{kJ mol}^{-1}$ | $\Delta_{\text{R}}H /$<br>$\text{kJ mol}^{-1}$ | $\Delta_{\text{R}}E /$<br>$\text{kJ mol}^{-1}$ |
|---------------------------------------------------------------|------------------------------------------------|------------------------------------------------|------------------------------------------------|
| $[\text{Au}(\text{CO})_2]^+$                                  | 468.5                                          | 504.3                                          | 879.7                                          |
| $[\text{Au}(\text{C}_6\text{Me}_6)(\text{CO})]^{+\text{[a]}}$ | -80.0                                          | -39.1                                          | -28.4                                          |
| $[\text{Au}(\text{Mes})(\text{CO})]^+$                        | -29.5                                          | 8.3                                            | 21.9                                           |
| $[\text{Au}(\text{C}_6\text{H}_6)(\text{CO})]^+$              | 17.8                                           | 55.7                                           | 69.2                                           |
| $[\text{Au}(o\text{-dfb})(\text{CO})]^+$                      | -5.1                                           | 28.9                                           | 38.1                                           |
| $[\text{Au}(4\text{FB})(\text{CO})]^+$                        | -16.9                                          | 19.1                                           | 27.4                                           |
| $[\text{Au}(\text{C}_6\text{Me}_6)_2]^+$                      | -61.2                                          | -13.6                                          | -2.5                                           |
| $[\text{Au}(\text{Mes})_2]^+$                                 | -16.8                                          | 27.1                                           | 40.7                                           |
| $[\text{Au}(\text{C}_6\text{H}_6)_2]^+$                       | 21.9                                           | 54.0                                           | 67.3                                           |
| $[\text{Au}(o\text{-dfb})_2]^+$                               | -21.6                                          | 10.4                                           | 18.9                                           |
| $[\text{Au}(4\text{FB})_2]^+$                                 | -55.8                                          | -22.8                                          | -15.2                                          |

a) The  $[\text{Au}(\text{C}_6\text{Me}_6)(\text{CO})]^+$  cation has one imaginary frequency of  $-15 \text{ cm}^{-1}$ , which could not be removed.

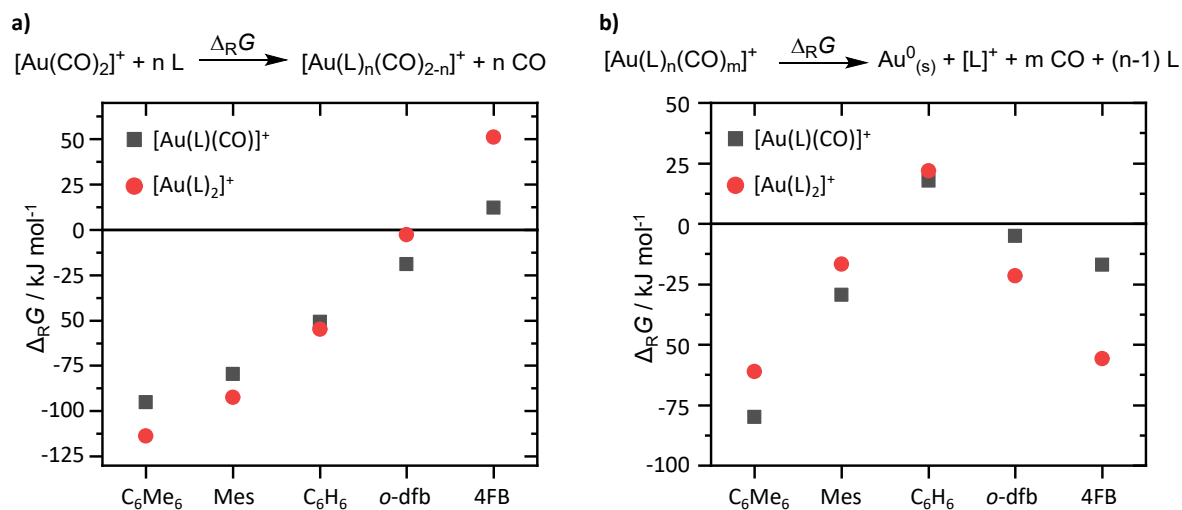

**Figure S 40:** Gibbs free energy  $\Delta_{\text{R}}G$  for the formation (a) and decomposition (b) of a series of  $[\text{Au}(\text{arene})(\text{CO})]^+$  and  $[\text{Au}(\text{arene})_2]^+$  (arene =  $\text{C}_6\text{Me}_6$ , Mes,  $\text{C}_6\text{H}_6$ ,  $o\text{-dfb}$ , 4FB) cations. The calculations were performed at the B3LYP(D3BJ)/def2-TZVPP level of theory in the gas phase (Table S 16 and Table S 17).

## Coordinates of the calculations at the r2scan-3c level of theory in Angstrom

### [Cu(CO)<sub>2</sub>]<sup>+</sup>

|    |                   |                   |                   |
|----|-------------------|-------------------|-------------------|
| Cu | 0.00000001883254  | 0.00000003344058  | 0.00000000079632  |
| C  | 0.00000002463797  | 0.00000000185702  | 1.89086731160798  |
| O  | -0.00000002752923 | -0.00000002276952 | 3.01212891813180  |
| C  | -0.0000000130734  | 0.00000001849931  | -1.89086731201003 |
| O  | -0.00000001463394 | -0.00000003102739 | -3.01212891852607 |

### [Au(CO)<sub>2</sub>]<sup>0</sup>

|    |                   |                   |                   |
|----|-------------------|-------------------|-------------------|
| Au | -0.04292640503050 | -0.23322902013962 | 0.00000058286570  |
| C  | -0.04211104500482 | -0.22809112444753 | 1.98111574806351  |
| O  | 0.05414618283226  | 0.29577408584202  | 3.00495978737645  |
| C  | -0.04213524781025 | -0.22808359727623 | -1.98111571152581 |
| O  | 0.05416251501331  | 0.29576945602137  | -3.00496060677985 |

### [Au(CO)<sub>2</sub>]<sup>+</sup>

|    |                   |                   |                   |
|----|-------------------|-------------------|-------------------|
| Au | -0.0000000040934  | -0.00000000543655 | -0.0000000043188  |
| C  | 0.00000000122472  | -0.00000000086769 | 1.98541379313191  |
| O  | -0.00000000245272 | 0.00000000201180  | 3.10589807333590  |
| C  | 0.00000000698735  | 0.00000000546228  | -1.98541379281168 |
| O  | -0.00000000535001 | -0.00000000116984 | -3.10589807322424 |

### CO

|   |                  |                  |                   |
|---|------------------|------------------|-------------------|
| C | 0.00000000000000 | 0.00000000000000 | 0.56522576164065  |
| O | 0.00000000000000 | 0.00000000000000 | -0.56522576164065 |

### [Cu(N<sub>2</sub>)<sub>2</sub>]<sup>+</sup>

|    |                   |                   |                   |
|----|-------------------|-------------------|-------------------|
| Cu | -0.00000000662707 | 0.00000003044051  | -0.00000000170881 |
| N  | 0.00000000284144  | -0.00000000779087 | 1.87260767068466  |
| N  | 0.00000000901772  | -0.00000001837795 | 2.96873630569737  |
| N  | -0.00000003088247 | 0.00000003553297  | -1.87260767069502 |
| N  | 0.00000002565038  | -0.00000003980464 | -2.96873630397820 |

### [Ag(N<sub>2</sub>)<sub>2</sub>]<sup>+</sup>

|    |                   |                   |                   |
|----|-------------------|-------------------|-------------------|
| Ag | 0.00000000105364  | 0.00000000528053  | 0.00000000505244  |
| N  | 0.00000000195097  | 0.00000000235350  | 2.15487529520225  |
| N  | -0.00000000000100 | -0.00000000662514 | 3.24878144747653  |
| N  | -0.00000000795522 | 0.00000000887854  | -2.15487529816569 |
| N  | 0.00000000495162  | -0.00000000988743 | -3.24878144956553 |

### [Au(N<sub>2</sub>)<sub>2</sub>]<sup>+</sup>

|    |                   |                   |                   |
|----|-------------------|-------------------|-------------------|
| Au | -0.00000000798200 | 0.00000000242801  | -0.00000000205108 |
| N  | 0.00000000010966  | -0.00000000086428 | 2.00247092330053  |
| N  | 0.00000000443951  | -0.00000000032428 | 3.09800238018216  |
| N  | -0.00000000210572 | -0.00000000098311 | -2.00247092231050 |
| N  | 0.00000000553853  | -0.00000000025634 | -3.09800237912112 |

### N<sub>2</sub>

|   |                  |                  |                   |
|---|------------------|------------------|-------------------|
| N | 0.00000000000000 | 0.00000000000000 | 0.54702974537322  |
| N | 0.00000000000000 | 0.00000000000000 | -0.54702974537322 |

### Cl<sub>2</sub>

|    |                  |                  |                   |
|----|------------------|------------------|-------------------|
| Cl | 0.00000000000000 | 0.00000000000000 | 1.01574738242401  |
| Cl | 0.00000000000000 | 0.00000000000000 | -1.01574738242401 |

### Br<sub>2</sub>

|    |                  |                  |                   |
|----|------------------|------------------|-------------------|
| Br | 0.00000000000000 | 0.00000000000000 | 1.15997713890191  |
| Br | 0.00000000000000 | 0.00000000000000 | -1.15997713890191 |

### I<sub>2</sub>

|   |                  |                  |                   |
|---|------------------|------------------|-------------------|
| I | 0.00000000000000 | 0.00000000000000 | 1.35806078130238  |
| I | 0.00000000000000 | 0.00000000000000 | -1.35806078130238 |

### [Au(P<sub>4</sub>)<sub>2</sub>]<sup>0</sup> (0° angle)

|    |                   |                   |                   |
|----|-------------------|-------------------|-------------------|
| Au | 0.00000001454608  | 0.00000334783030  | -0.00000002689680 |
| P  | 1.36615752742393  | 0.00000040438935  | 2.03526041993568  |
| P  | -1.36615747140014 | 0.00000025695255  | 2.03526033226083  |
| P  | 0.00000004798278  | -1.10400933619703 | 3.41019917286587  |
| P  | -0.00000007804418 | 1.10400702323391  | 3.41020156044764  |
| P  | 1.36615749709645  | 0.00000021767670  | -2.03526037072377 |



|   |                   |                   |                   |
|---|-------------------|-------------------|-------------------|
| P | -1.36615751246987 | 0.00000037562060  | -2.03526036833620 |
| P | -0.0000006971510  | -1.10400932122128 | -3.41019919565452 |
| P | 0.0000004458006   | 1.10400703171490  | -3.41020152389873 |

[Au(P<sub>4</sub>)<sub>2</sub>]<sup>+</sup> (0° angle)

|    |                   |                   |                   |
|----|-------------------|-------------------|-------------------|
| Au | 0.00000003676125  | 0.00000290510306  | -0.00000001309105 |
| P  | 1.21699492093842  | 0.00000047659897  | 2.17226109599623  |
| P  | -1.21699492004377 | 0.00000042191305  | 2.17226108519602  |
| P  | 0.00000001748807  | -1.12531051039715 | 3.62726721346481  |
| P  | -0.00000004488430 | 1.12530822434178  | 3.62726970251915  |
| P  | 1.21699494301215  | 0.00000033175295  | -2.17226111475539 |
| P  | -1.21699492238820 | 0.00000039199474  | -2.17226107845757 |
| P  | -0.00000004362083 | -1.12531048956464 | -3.62726729871524 |
| P  | 0.00000001273720  | 1.12530824825722  | -3.62726959215697 |

[Au(P<sub>4</sub>)<sub>2</sub>]<sup>+</sup> (90° angle)

|    |                   |                   |                   |
|----|-------------------|-------------------|-------------------|
| Au | -0.00280860007650 | -0.00000077972670 | -0.00000011092072 |
| P  | 0.82372174277830  | 0.88943245933660  | 2.17415443437212  |
| P  | -0.82376171007885 | -0.89143040732413 | 2.17462371998068  |
| P  | 0.82600385031332  | -0.76511955917702 | 3.63265265666611  |
| P  | -0.82463312132658 | 0.76215053544182  | 3.63394909965376  |
| P  | 0.82382174909923  | -0.88936564523402 | -2.17414435982445 |
| P  | -0.82380708651313 | 0.89136295459407  | -2.17463390094069 |
| P  | -0.82452465324673 | -0.76221711402316 | -3.63396018711273 |
| P  | 0.82598782905094  | 0.76518755611253  | -3.63264135187410 |

P<sub>4</sub>

|   |                   |                   |                   |
|---|-------------------|-------------------|-------------------|
| P | -0.78247246763482 | -0.78247247060105 | -0.78247246932416 |
| P | 0.78247246499008  | 0.78247246873128  | -0.78247246480966 |
| P | -0.78247246135615 | 0.78247246696711  | 0.78247246667943  |
| P | 0.78247246400088  | -0.78247246509734 | 0.78247246745439  |

[Au(P<sub>4</sub>S<sub>3</sub>)<sub>2</sub>]<sup>+</sup> (apical)

|    |                   |                   |                   |
|----|-------------------|-------------------|-------------------|
| Au | -0.00000004967256 | -0.00000000117995 | -0.00000004358517 |
| P  | -1.35776519465248 | 1.70805616211273  | 0.78142235167917  |
| P  | -2.46230808426457 | 4.70695843413859  | 0.95249804089254  |
| P  | -2.61017099541382 | 3.67081240269253  | 2.97707948538545  |
| P  | -4.13027392475051 | 3.20408495945590  | 1.34406588704414  |
| S  | -0.99341059529353 | 3.58566543628431  | -0.09357884266910 |
| S  | -1.20835023399670 | 2.08123537241379  | 2.84562941437213  |
| S  | -3.41607869872617 | 1.40239556651215  | 0.47651927603122  |
| P  | 1.35776509303498  | -1.70805620108879 | -0.78142240122795 |
| P  | 2.46230826519786  | -4.70695842543906 | -0.95249796095670 |
| P  | 2.61017106330758  | -3.67081243855289 | -2.97707943081591 |
| P  | 4.13027394713471  | -3.20408480371708 | -1.34406585494670 |
| S  | 0.99341067058440  | -3.58566548948096 | 0.09357885809124  |
| S  | 1.20835016011000  | -2.08123553569846 | -2.84562944400446 |
| S  | 3.41607857740079  | -1.40239543845281 | -0.47651933528990 |

[Au(P<sub>4</sub>S<sub>3</sub>)<sub>2</sub>]<sup>+</sup> (basal)

|    |                   |                   |                   |
|----|-------------------|-------------------|-------------------|
| Au | -0.00000009122717 | -0.00000006021345 | 0.00000001510144  |
| P  | -4.05101046638529 | 3.35016371200490  | 1.28586525888478  |
| P  | -1.33902990771043 | 1.73130446531259  | 0.76256158369411  |
| P  | -1.08668434088973 | 2.80266925203549  | 2.71654752918836  |
| P  | -0.81045758223832 | 3.91110380638216  | 0.71820631110673  |
| S  | -3.37851220445243 | 1.52581565659739  | 0.36935197748399  |
| S  | -3.10476810136058 | 3.15562557584325  | 3.19747788723411  |
| S  | -2.71081990924448 | 4.73436135316131  | 0.34853029158071  |
| P  | 4.05101085725416  | -3.35016221060715 | -1.28586771667059 |
| P  | 1.33902979022888  | -1.73130453633982 | -0.76256156732965 |
| P  | 1.08668185371723  | -2.80267213765845 | -2.71654566609513 |
| P  | 0.81045938213140  | -3.91110426189668 | -0.71820253150901 |
| S  | 3.37851258658902  | -1.52581348569986 | -0.36935573285913 |
| S  | 3.10476510402855  | -3.15562742212940 | -3.19747899492608 |
| S  | 2.71082302955919  | -4.73435970679226 | -0.34852864488464 |

P<sub>4</sub>S<sub>3</sub>

|   |                   |                   |                   |
|---|-------------------|-------------------|-------------------|
| P | -0.00020169422279 | -0.00000000434325 | -1.74131912749463 |
| S | 0.93957557238030  | 1.62668090689678  | -0.72817496293982 |
| S | 0.93957557647290  | -1.62668091481982 | -0.72817497078751 |
| S | -1.87867395008695 | 0.00000000345431  | -0.72804821925772 |
| P | 0.65349967257216  | 1.13211333662435  | 1.30854224125635  |

P 0.65349967510396 -1.13211332850255 1.30854223279368  
P -1.30727485221958 0.00000000069018 1.30863300642966

### Coordinates and frequencies of the calculations at the B3LYP(D3BJ)/def2-TZVPP of theory

[Au(CO)<sub>2</sub>]<sup>+</sup>

Symmetry: d6h

Cartesian coordinates in Ångström:

|    |           |           |            |
|----|-----------|-----------|------------|
| Au | 0.0000000 | 0.0000000 | -0.0000000 |
| C  | 0.0000000 | 0.0000000 | 2.0014701  |
| O  | 0.0000000 | 0.0000000 | 3.1158141  |
| C  | 0.0000000 | 0.0000000 | -2.0014701 |
| O  | 0.0000000 | 0.0000000 | -3.1158141 |

\$vibrational spectrum

| # | mode | symmetry | wave number<br>cm <sup>**(-1)</sup> | IR intensity<br>km/mol | selection rules |       |
|---|------|----------|-------------------------------------|------------------------|-----------------|-------|
| # |      |          |                                     |                        | IR              | RAMAN |
|   | 1    |          | -0.00                               | 0.00000                | -               | -     |
|   | 2    |          | -0.00                               | 0.00000                | -               | -     |
|   | 3    |          | -0.00                               | 0.00000                | -               | -     |
|   | 4    |          | 0.00                                | 0.00000                | -               | -     |
|   | 5    |          | 0.00                                | 0.00000                | -               | -     |
|   | 6    | e1u      | 63.66                               | 0.19334                | YES             | NO    |
|   | 7    | e1u      | 63.66                               | 0.19334                | YES             | NO    |
|   | 8    | e1g      | 308.40                              | 0.00000                | NO              | YES   |
|   | 9    | e1g      | 308.40                              | 0.00000                | NO              | YES   |
|   | 10   | a2u      | 343.23                              | 39.80471               | YES             | NO    |
|   | 11   | a1g      | 385.76                              | 0.00000                | NO              | YES   |
|   | 12   | e1u      | 404.78                              | 7.94325                | YES             | NO    |
|   | 13   | e1u      | 404.78                              | 7.94325                | YES             | NO    |
|   | 14   | a2u      | 2296.79                             | 504.63222              | YES             | NO    |
|   | 15   | a1g      | 2331.49                             | 0.00000                | NO              | YES   |

\$raman spectrum

| # | mode | symmetry | wave number          | selection rule | derivative of isotropic polarizability a.u. | derivative of polarizability anisotropy a.u. | raman scattering cross sections bohr <sup>**2</sup> /sr |             |
|---|------|----------|----------------------|----------------|---------------------------------------------|----------------------------------------------|---------------------------------------------------------|-------------|
| # |      |          | cm <sup>**(-1)</sup> |                |                                             |                                              | T,T                                                     | II,II       |
|   | 1    |          | 0.00                 | -              | 0.000000                                    | 0.000000                                     | 0.00000D+00                                             | 0.00000D+00 |
|   | 2    |          | 0.00                 | -              | 0.000000                                    | 0.000000                                     | 0.00000D+00                                             | 0.00000D+00 |
|   | 3    |          | 0.00                 | -              | 0.000000                                    | 0.000000                                     | 0.00000D+00                                             | 0.00000D+00 |
|   | 4    |          | 0.00                 | -              | 0.000000                                    | 0.000000                                     | 0.00000D+00                                             | 0.00000D+00 |
|   | 5    |          | 0.00                 | -              | 0.000000                                    | 0.000000                                     | 0.00000D+00                                             | 0.00000D+00 |
|   | 6    | e1u      | 63.66                | NO             | 0.000000                                    | 0.000000                                     | 0.00000D+00                                             | 0.00000D+00 |
|   | 7    | e1u      | 63.66                | NO             | 0.000000                                    | 0.000000                                     | 0.00000D+00                                             | 0.00000D+00 |
|   | 8    | e1g      | 308.40               | YES            | 0.000000                                    | 0.011689                                     | 0.46573D-16                                             | 0.34930D-16 |
|   | 9    | e1g      | 308.40               | YES            | 0.000000                                    | 0.011689                                     | 0.46573D-16                                             | 0.34930D-16 |
|   | 10   | a2u      | 343.23               | NO             | 0.000000                                    | 0.000000                                     | 0.00000D+00                                             | 0.00000D+00 |
|   | 11   | a1g      | 385.76               | YES            | 0.009897                                    | 0.012333                                     | 0.30278D-15                                             | 0.27540D-16 |
|   | 12   | e1u      | 404.78               | NO             | 0.000000                                    | 0.000000                                     | 0.00000D+00                                             | 0.00000D+00 |
|   | 13   | e1u      | 404.78               | NO             | 0.000000                                    | 0.000000                                     | 0.00000D+00                                             | 0.00000D+00 |
|   | 14   | a2u      | 2296.79              | NO             | 0.000000                                    | 0.000000                                     | 0.00000D+00                                             | 0.00000D+00 |
|   | 15   | a1g      | 2331.49              | YES            | 0.117993                                    | 0.340160                                     | 0.34733D-14                                             | 0.11068D-14 |

CO

Symmetry: c6v

Cartesian coordinates in Ångström:

|   |         |         |          |
|---|---------|---------|----------|
| C | 0.00000 | 0.00000 | -0.56243 |
| O | 0.00000 | 0.00000 | 0.56243  |

\$vibrational spectrum

| # | mode | symmetry | wave number<br>cm <sup>**(-1)</sup> | IR intensity<br>km/mol | selection rules |       |
|---|------|----------|-------------------------------------|------------------------|-----------------|-------|
| # |      |          |                                     |                        | IR              | RAMAN |
|   | 1    |          | 0.00                                | 0.00000                | -               | -     |
|   | 2    |          | 0.00                                | 0.00000                | -               | -     |
|   | 3    |          | 0.00                                | 0.00000                | -               | -     |
|   | 4    |          | 0.00                                | 0.00000                | -               | -     |
|   | 5    |          | 0.00                                | 0.00000                | -               | -     |
|   | 6    | a1       | 2213.96                             | 76.50678               | YES             | YES   |

[Au(P<sub>4</sub>)<sub>2</sub>]<sup>+</sup> (θ° angle)

Symmetry: d2h

Cartesian coordinates in Ångström:

|    |            |            |           |
|----|------------|------------|-----------|
| Au | 0.0000000  | 0.0000000  | 0.0000000 |
| P  | 1.2154977  | 0.0000000  | 2.1941720 |
| P  | -1.2154977 | 0.0000000  | 2.1941720 |
| P  | 0.0000000  | -1.1189271 | 3.6396846 |

P 0.000000 1.1189271 3.6396846  
P 1.2154977 0.0000000 -2.1941720  
P -1.2154977 0.0000000 -2.1941720  
P 0.0000000 -1.1189271 -3.6396846  
P 0.0000000 1.1189271 -3.6396846

\$vibrational spectrum

| #  | mode | symmetry | wave number<br>cm**(-1) | IR intensity<br>km/mol | selection rules |       |
|----|------|----------|-------------------------|------------------------|-----------------|-------|
| #  |      |          |                         |                        | IR              | RAMAN |
| 1  |      |          | -0.00                   | 0.00000                | -               | -     |
| 2  |      |          | -0.00                   | 0.00000                | -               | -     |
| 3  |      |          | -0.00                   | 0.00000                | -               | -     |
| 4  |      |          | 0.00                    | 0.00000                | -               | -     |
| 5  |      |          | 0.00                    | 0.00000                | -               | -     |
| 6  |      |          | 0.00                    | 0.00000                | -               | -     |
| 7  |      | au       | 13.06                   | 0.00000                | NO              | NO    |
| 8  |      | b2u      | 28.64                   | 0.53748                | YES             | NO    |
| 9  |      | b3u      | 38.65                   | 1.08510                | YES             | NO    |
| 10 |      | b3g      | 80.46                   | 0.00000                | NO              | YES   |
| 11 |      | b1u      | 121.71                  | 4.50578                | YES             | NO    |
| 12 |      | ag       | 123.01                  | 0.00000                | NO              | YES   |
| 13 |      | b2u      | 127.86                  | 1.29149                | YES             | NO    |
| 14 |      | b2g      | 166.90                  | 0.00000                | NO              | YES   |
| 15 |      | b3u      | 175.39                  | 1.28499                | YES             | NO    |
| 16 |      | b1u      | 367.91                  | 4.56897                | YES             | NO    |
| 17 |      | b1g      | 373.24                  | 0.00000                | NO              | YES   |
| 18 |      | ag       | 373.53                  | 0.00000                | NO              | YES   |
| 19 |      | au       | 373.86                  | 0.00000                | NO              | NO    |
| 20 |      | b1u      | 382.60                  | 17.00145               | YES             | NO    |
| 21 |      | ag       | 391.24                  | 0.00000                | NO              | YES   |
| 22 |      | b2g      | 457.56                  | 0.00000                | NO              | YES   |
| 23 |      | b3g      | 462.27                  | 0.00000                | NO              | YES   |
| 24 |      | b2u      | 462.27                  | 0.66365                | YES             | NO    |
| 25 |      | b3u      | 465.65                  | 0.27594                | YES             | NO    |
| 26 |      | b1u      | 583.75                  | 0.03986                | YES             | NO    |
| 27 |      | ag       | 585.58                  | 0.00000                | NO              | YES   |

\$raman spectrum

| #  | mode | symmetry | wave number | selection rule | derivative of isotropic polarizability a.u. | derivative of polarizability anisotropy a.u. | raman scattering cross sections bohr**2/sr |             |
|----|------|----------|-------------|----------------|---------------------------------------------|----------------------------------------------|--------------------------------------------|-------------|
| #  |      |          | cm**(-1)    |                |                                             |                                              | T, T                                       | II, II      |
| 1  |      |          | 0.00        | -              | 0.000000                                    | 0.000000                                     | 0.00000D+00                                | 0.00000D+00 |
| 2  |      |          | 0.00        | -              | 0.000000                                    | 0.000000                                     | 0.00000D+00                                | 0.00000D+00 |
| 3  |      |          | 0.00        | -              | 0.000000                                    | 0.000000                                     | 0.00000D+00                                | 0.00000D+00 |
| 4  |      |          | 0.00        | -              | 0.000000                                    | 0.000000                                     | 0.00000D+00                                | 0.00000D+00 |
| 5  |      |          | 0.00        | -              | 0.000000                                    | 0.000000                                     | 0.00000D+00                                | 0.00000D+00 |
| 6  |      |          | 0.00        | -              | 0.000000                                    | 0.000000                                     | 0.00000D+00                                | 0.00000D+00 |
| 7  |      | au       | 13.06       | NO             | 0.000000                                    | 0.000000                                     | 0.00000D+00                                | 0.00000D+00 |
| 8  |      | b2u      | 28.64       | NO             | 0.000000                                    | 0.000000                                     | 0.00000D+00                                | 0.00000D+00 |
| 9  |      | b3u      | 38.65       | NO             | 0.000000                                    | 0.000000                                     | 0.00000D+00                                | 0.00000D+00 |
| 10 |      | b3g      | 80.46       | YES            | 0.000000                                    | 0.047663                                     | 0.78859D-14                                | 0.59144D-14 |
| 11 |      | b1u      | 121.71      | NO             | 0.000000                                    | 0.000000                                     | 0.00000D+00                                | 0.00000D+00 |
| 12 |      | ag       | 123.01      | YES            | -0.014474                                   | 0.039821                                     | 0.63176D-14                                | 0.19057D-14 |
| 13 |      | b2u      | 127.86      | NO             | 0.000000                                    | 0.000000                                     | 0.00000D+00                                | 0.00000D+00 |
| 14 |      | b2g      | 166.90      | YES            | 0.000000                                    | 0.026774                                     | 0.67237D-15                                | 0.50428D-15 |
| 15 |      | b3u      | 175.39      | NO             | 0.000000                                    | 0.000000                                     | 0.00000D+00                                | 0.00000D+00 |
| 16 |      | b1u      | 367.91      | NO             | 0.000000                                    | 0.000000                                     | 0.00000D+00                                | 0.00000D+00 |
| 17 |      | b1g      | 373.24      | YES            | 0.000000                                    | 0.106284                                     | 0.28673D-14                                | 0.21505D-14 |
| 18 |      | ag       | 373.53      | YES            | -0.028260                                   | 0.123750                                     | 0.61605D-14                                | 0.29120D-14 |
| 19 |      | au       | 373.86      | NO             | 0.000000                                    | 0.000000                                     | 0.00000D+00                                | 0.00000D+00 |
| 20 |      | b1u      | 382.60      | NO             | 0.000000                                    | 0.000000                                     | 0.00000D+00                                | 0.00000D+00 |
| 21 |      | ag       | 391.24      | YES            | -0.007242                                   | 0.133109                                     | 0.43269D-14                                | 0.31406D-14 |
| 22 |      | b2g      | 457.56      | YES            | 0.000000                                    | 0.144015                                     | 0.38797D-14                                | 0.29098D-14 |
| 23 |      | b3g      | 462.27      | YES            | 0.000000                                    | 0.192148                                     | 0.68027D-14                                | 0.51020D-14 |
| 24 |      | b2u      | 462.27      | NO             | 0.000000                                    | 0.000000                                     | 0.52815D-34                                | 0.39612D-34 |
| 25 |      | b3u      | 465.65      | NO             | 0.000000                                    | 0.000000                                     | 0.00000D+00                                | 0.00000D+00 |
| 26 |      | b1u      | 583.75      | NO             | 0.000000                                    | 0.000000                                     | 0.00000D+00                                | 0.00000D+00 |
| 27 |      | ag       | 585.58      | YES            | -0.183515                                   | 0.204585                                     | 0.54923D-13                                | 0.40978D-14 |

[Au(P<sub>4</sub>S<sub>3</sub>)<sub>2</sub>]<sup>+</sup> (apical)

Symmetry: ci

Cartesian coordinates in Ångström:

Au 0.0000000 0.0000000 0.0000000  
P -1.3635262 1.7157194 0.7819417  
P -2.4640190 4.7016941 0.9564026  
P -2.6093383 3.6683465 2.9711605  
P -4.1240854 3.2049882 1.3466386  
S -1.0007927 3.5790434 -0.0877439  
S -1.2114262 2.0814786 2.8320427

```

S -3.4065532 1.4100160 0.4777511
P 1.3635262 -1.7157194 -0.7819417
P 2.4640190 -4.7016941 -0.9564026
P 2.6093383 -3.6683465 -2.9711605
P 4.1240854 -3.2049882 -1.3466386
S 1.0007927 -3.5790434 0.0877439
S 1.2114262 -2.0814786 -2.8320427
S 3.4065532 -1.4100160 -0.4777511

```

\$vibrational spectrum

| #  | mode | symmetry | wave number<br>cm**(-1) | IR intensity<br>km/mol | selection rules |       |
|----|------|----------|-------------------------|------------------------|-----------------|-------|
| #  |      |          |                         |                        | IR              | RAMAN |
| 1  |      |          | -0.00                   | 0.00000                | -               | -     |
| 2  |      |          | -0.00                   | 0.00000                | -               | -     |
| 3  |      |          | -0.00                   | 0.00000                | -               | -     |
| 4  |      |          | 0.00                    | 0.00000                | -               | -     |
| 5  |      |          | 0.00                    | 0.00000                | -               | -     |
| 6  |      |          | 0.00                    | 0.00000                | -               | -     |
| 7  |      | au       | 8.78                    | 0.00003                | YES             | NO    |
| 8  |      | au       | 16.15                   | 0.16212                | YES             | NO    |
| 9  |      | au       | 16.44                   | 0.16150                | YES             | NO    |
| 10 |      | ag       | 61.80                   | 0.00000                | NO              | YES   |
| 11 |      | ag       | 61.93                   | 0.00000                | NO              | YES   |
| 12 |      | ag       | 97.98                   | 0.00000                | NO              | YES   |
| 13 |      | au       | 106.33                  | 0.04749                | YES             | NO    |
| 14 |      | au       | 106.37                  | 0.04810                | YES             | NO    |
| 15 |      | au       | 145.62                  | 1.48032                | YES             | NO    |
| 16 |      | ag       | 185.20                  | 0.00000                | NO              | YES   |
| 17 |      | au       | 185.25                  | 0.00004                | YES             | NO    |
| 18 |      | ag       | 222.05                  | 0.00000                | NO              | YES   |
| 19 |      | ag       | 222.14                  | 0.00000                | NO              | YES   |
| 20 |      | au       | 224.71                  | 5.48542                | YES             | NO    |
| 21 |      | au       | 224.80                  | 5.48180                | YES             | NO    |
| 22 |      | ag       | 284.22                  | 0.00000                | NO              | YES   |
| 23 |      | ag       | 284.24                  | 0.00000                | NO              | YES   |
| 24 |      | au       | 284.36                  | 0.46566                | YES             | NO    |
| 25 |      | au       | 284.38                  | 0.46698                | YES             | NO    |
| 26 |      | ag       | 332.90                  | 0.00000                | NO              | YES   |
| 27 |      | au       | 332.97                  | 0.13452                | YES             | NO    |
| 28 |      | ag       | 332.97                  | 0.00000                | NO              | YES   |
| 29 |      | au       | 333.03                  | 0.13542                | YES             | NO    |
| 30 |      | au       | 382.65                  | 29.11226               | YES             | NO    |
| 31 |      | ag       | 390.51                  | 0.00000                | NO              | YES   |
| 32 |      | au       | 423.49                  | 70.31441               | YES             | NO    |
| 33 |      | ag       | 424.50                  | 0.00000                | NO              | YES   |
| 34 |      | ag       | 454.00                  | 0.00000                | NO              | YES   |
| 35 |      | ag       | 454.04                  | 0.00000                | NO              | YES   |
| 36 |      | au       | 455.14                  | 6.89265                | YES             | NO    |
| 37 |      | au       | 455.19                  | 6.88379                | YES             | NO    |
| 38 |      | au       | 466.74                  | 9.97513                | YES             | NO    |
| 39 |      | ag       | 470.29                  | 0.00000                | NO              | YES   |
| 40 |      | au       | 489.32                  | 43.33703               | YES             | NO    |
| 41 |      | ag       | 504.30                  | 0.00000                | NO              | YES   |
| 42 |      | ag       | 504.33                  | 0.00000                | NO              | YES   |
| 43 |      | au       | 510.04                  | 22.46891               | YES             | NO    |
| 44 |      | au       | 510.07                  | 22.48188               | YES             | NO    |
| 45 |      | ag       | 510.60                  | 0.00000                | NO              | YES   |

\$raman spectrum

| #  | mode | symmetry | wave number | selection rule | derivative of isotropic polarizability a.u. | derivative of polarizability anisotropy a.u. | raman scattering cross sections bohr**2/sr |             |
|----|------|----------|-------------|----------------|---------------------------------------------|----------------------------------------------|--------------------------------------------|-------------|
| #  |      |          | cm**(-1)    |                |                                             |                                              | T,T                                        | II,II       |
| 1  |      |          | 0.00        | -              | 0.000000                                    | 0.000000                                     | 0.00000D+00                                | 0.00000D+00 |
| 2  |      |          | 0.00        | -              | 0.000000                                    | 0.000000                                     | 0.00000D+00                                | 0.00000D+00 |
| 3  |      |          | 0.00        | -              | 0.000000                                    | 0.000000                                     | 0.00000D+00                                | 0.00000D+00 |
| 4  |      |          | 0.00        | -              | 0.000000                                    | 0.000000                                     | 0.00000D+00                                | 0.00000D+00 |
| 5  |      |          | 0.00        | -              | 0.000000                                    | 0.000000                                     | 0.00000D+00                                | 0.00000D+00 |
| 6  |      |          | 0.00        | -              | 0.000000                                    | 0.000000                                     | 0.00000D+00                                | 0.00000D+00 |
| 7  |      | au       | 8.78        | NO             | 0.000000                                    | 0.000000                                     | 0.00000D+00                                | 0.00000D+00 |
| 8  |      | au       | 16.15       | NO             | 0.000000                                    | 0.000000                                     | 0.00000D+00                                | 0.00000D+00 |
| 9  |      | au       | 16.44       | NO             | 0.000000                                    | 0.000000                                     | 0.00000D+00                                | 0.00000D+00 |
| 10 |      | ag       | 61.80       | YES            | 0.000005                                    | 0.005540                                     | 0.17448D-15                                | 0.13086D-15 |
| 11 |      | ag       | 61.93       | YES            | 0.000011                                    | 0.005560                                     | 0.17507D-15                                | 0.13129D-15 |
| 12 |      | ag       | 97.98       | YES            | 0.028690                                    | 0.071881                                     | 0.34859D-13                                | 0.93636D-14 |
| 13 |      | au       | 106.33      | NO             | 0.000000                                    | 0.000000                                     | 0.00000D+00                                | 0.00000D+00 |
| 14 |      | au       | 106.37      | NO             | 0.000000                                    | 0.000000                                     | 0.00000D+00                                | 0.00000D+00 |
| 15 |      | au       | 145.62      | NO             | 0.000000                                    | 0.000000                                     | 0.00000D+00                                | 0.00000D+00 |
| 16 |      | ag       | 185.20      | YES            | -0.000005                                   | 0.000168                                     | 0.22265D-19                                | 0.16563D-19 |
| 17 |      | au       | 185.25      | NO             | 0.000000                                    | 0.000000                                     | 0.23569D-34                                | 0.92632D-35 |

|    |    |        |     |           |          |             |             |
|----|----|--------|-----|-----------|----------|-------------|-------------|
| 18 | ag | 222.05 | YES | 0.000002  | 0.082537 | 0.39442D-14 | 0.29582D-14 |
| 19 | ag | 222.14 | YES | -0.000004 | 0.082541 | 0.39419D-14 | 0.29564D-14 |
| 20 | au | 224.71 | NO  | 0.000000  | 0.000000 | 0.00000D+00 | 0.00000D+00 |
| 21 | au | 224.80 | NO  | 0.000000  | 0.000000 | 0.00000D+00 | 0.00000D+00 |
| 22 | ag | 284.22 | YES | 0.000007  | 0.118042 | 0.54041D-14 | 0.40531D-14 |
| 23 | ag | 284.24 | YES | 0.000004  | 0.118035 | 0.54029D-14 | 0.40522D-14 |
| 24 | au | 284.36 | NO  | 0.000000  | 0.000000 | 0.00000D+00 | 0.00000D+00 |
| 25 | au | 284.38 | NO  | 0.000000  | 0.000000 | 0.11585D-34 | 0.45531D-35 |
| 26 | ag | 332.90 | YES | -0.000003 | 0.130825 | 0.51786D-14 | 0.38840D-14 |
| 27 | au | 332.97 | NO  | 0.000000  | 0.000000 | 0.93491D-33 | 0.69942D-33 |
| 28 | ag | 332.97 | YES | 0.000003  | 0.130814 | 0.51761D-14 | 0.38821D-14 |
| 29 | au | 333.03 | NO  | 0.000000  | 0.000000 | 0.00000D+00 | 0.00000D+00 |
| 30 | au | 382.65 | NO  | 0.000000  | 0.000000 | 0.00000D+00 | 0.00000D+00 |
| 31 | ag | 390.51 | YES | -0.075768 | 0.058841 | 0.16128D-13 | 0.61544D-15 |
| 32 | au | 423.49 | NO  | 0.000000  | 0.000000 | 0.00000D+00 | 0.00000D+00 |
| 33 | ag | 424.50 | YES | -0.054754 | 0.011144 | 0.70783D-14 | 0.19477D-16 |
| 34 | ag | 454.00 | YES | -0.000014 | 0.050797 | 0.48829D-15 | 0.36621D-15 |
| 35 | ag | 454.04 | YES | -0.000039 | 0.050774 | 0.48778D-15 | 0.36584D-15 |
| 36 | au | 455.14 | NO  | 0.000000  | 0.000000 | 0.00000D+00 | 0.00000D+00 |
| 37 | au | 455.19 | NO  | 0.000000  | 0.000000 | 0.00000D+00 | 0.00000D+00 |
| 38 | au | 466.74 | NO  | 0.000000  | 0.000000 | 0.00000D+00 | 0.00000D+00 |
| 39 | ag | 470.29 | YES | 0.091131  | 0.039033 | 0.17057D-13 | 0.20528D-15 |
| 40 | au | 489.32 | NO  | 0.000000  | 0.000000 | 0.00000D+00 | 0.00000D+00 |
| 41 | ag | 504.30 | YES | -0.000274 | 0.065421 | 0.69415D-15 | 0.52051D-15 |
| 42 | ag | 504.33 | YES | 0.000432  | 0.065425 | 0.69438D-15 | 0.52053D-15 |
| 43 | au | 510.04 | NO  | 0.000000  | 0.000000 | 0.00000D+00 | 0.00000D+00 |
| 44 | au | 510.07 | NO  | 0.000000  | 0.000000 | 0.00000D+00 | 0.00000D+00 |
| 45 | ag | 510.60 | YES | 0.090183  | 0.158009 | 0.18546D-13 | 0.29819D-14 |

[Au(P<sub>4</sub>S<sub>3</sub>)<sub>2</sub>]<sup>+</sup> (basal)

Symmetry: c1

Cartesian coordinates in Ångström:

|    |            |            |            |
|----|------------|------------|------------|
| Au | 0.0000003  | 0.0000006  | -0.0000008 |
| P  | -4.0402537 | 3.3550317  | 1.2895128  |
| P  | -1.3502881 | 1.7298422  | 0.7662743  |
| P  | -1.0879255 | 2.7949696  | 2.7067205  |
| P  | -0.8123377 | 3.8923817  | 0.7148669  |
| S  | -3.3809302 | 1.5349735  | 0.3779506  |
| S  | -3.0973530 | 3.1596603  | 3.1895339  |
| S  | -2.7046264 | 4.7235577  | 0.3510972  |
| P  | 4.0402386  | -3.3550922 | -1.2894033 |
| P  | 1.3502885  | -1.7298412 | -0.7662760 |
| P  | 1.0880372  | -2.7948483 | -2.7068032 |
| P  | 0.8122604  | -3.8923653 | -0.7150335 |
| S  | 3.3809078  | -1.5350639 | -0.3777868 |
| S  | 3.0974889  | -3.1595799 | -3.1894849 |
| S  | 2.7044932  | -4.7236264 | -0.3511675 |

\$vibrational spectrum

| #  | mode | symmetry | wave number<br>cm**(-1) | IR intensity<br>km/mol | selection rules<br>IR | RAMAN |
|----|------|----------|-------------------------|------------------------|-----------------------|-------|
| 1  |      |          | -0.00                   | 0.00000                | -                     | -     |
| 2  |      |          | -0.00                   | 0.00000                | -                     | -     |
| 3  |      |          | -0.00                   | 0.00000                | -                     | -     |
| 4  |      |          | 0.00                    | 0.00000                | -                     | -     |
| 5  |      |          | 0.00                    | 0.00000                | -                     | -     |
| 6  |      |          | 0.00                    | 0.00000                | -                     | -     |
| 7  |      | a        | 6.29                    | 0.01262                | YES                   | YES   |
| 8  |      | a        | 14.62                   | 0.05972                | YES                   | YES   |
| 9  |      | a        | 15.55                   | 0.04044                | YES                   | YES   |
| 10 |      | a        | 48.64                   | 0.00000                | YES                   | YES   |
| 11 |      | a        | 60.39                   | 0.00000                | YES                   | YES   |
| 12 |      | a        | 89.91                   | 0.35542                | YES                   | YES   |
| 13 |      | a        | 92.54                   | 0.00000                | YES                   | YES   |
| 14 |      | a        | 105.14                  | 1.58332                | YES                   | YES   |
| 15 |      | a        | 139.07                  | 1.17280                | YES                   | YES   |
| 16 |      | a        | 192.94                  | 0.00000                | YES                   | YES   |
| 17 |      | a        | 197.27                  | 0.00042                | YES                   | YES   |
| 18 |      | a        | 217.74                  | 0.00000                | YES                   | YES   |
| 19 |      | a        | 217.96                  | 5.39104                | YES                   | YES   |
| 20 |      | a        | 221.03                  | 6.34284                | YES                   | YES   |
| 21 |      | a        | 221.23                  | 0.00000                | YES                   | YES   |
| 22 |      | a        | 287.33                  | 0.00000                | YES                   | YES   |
| 23 |      | a        | 287.92                  | 0.00841                | YES                   | YES   |
| 24 |      | a        | 307.36                  | 10.62525               | YES                   | YES   |
| 25 |      | a        | 308.55                  | 0.00000                | YES                   | YES   |
| 26 |      | a        | 346.17                  | 5.32581                | YES                   | YES   |
| 27 |      | a        | 346.22                  | 0.00000                | YES                   | YES   |
| 28 |      | a        | 365.72                  | 18.71689               | YES                   | YES   |
| 29 |      | a        | 370.51                  | 0.00000                | YES                   | YES   |
| 30 |      | a        | 371.89                  | 0.00000                | YES                   | YES   |

|    |   |        |          |     |     |
|----|---|--------|----------|-----|-----|
| 31 | a | 374.30 | 0.15096  | YES | YES |
| 32 | a | 410.16 | 30.76558 | YES | YES |
| 33 | a | 410.54 | 0.00000  | YES | YES |
| 34 | a | 412.68 | 21.70624 | YES | YES |
| 35 | a | 412.94 | 0.00000  | YES | YES |
| 36 | a | 419.50 | 0.00000  | YES | YES |
| 37 | a | 420.80 | 17.01800 | YES | YES |
| 38 | a | 467.23 | 27.35607 | YES | YES |
| 39 | a | 468.34 | 0.00000  | YES | YES |
| 40 | a | 485.78 | 0.00001  | YES | YES |
| 41 | a | 485.81 | 5.46374  | YES | YES |
| 42 | a | 494.59 | 12.04321 | YES | YES |
| 43 | a | 509.89 | 0.00000  | YES | YES |
| 44 | a | 528.26 | 0.00000  | YES | YES |
| 45 | a | 533.17 | 3.42101  | YES | YES |

\$raman spectrum

| #  | mode | symmetry | wave number | selection rule | derivative of isotropic polarizability a.u. | derivative of polarizability anisotropy a.u. | raman scattering cross sections bohr**2/sr |
|----|------|----------|-------------|----------------|---------------------------------------------|----------------------------------------------|--------------------------------------------|
| #  | #    | #        | cm**(-1)    |                |                                             |                                              | T,T<br>II,II                               |
| 1  |      |          | 0.00        | -              | 0.000000                                    | 0.000000                                     | 0.00000D+00 0.00000D+00                    |
| 2  |      |          | 0.00        | -              | 0.000000                                    | 0.000000                                     | 0.00000D+00 0.00000D+00                    |
| 3  |      |          | 0.00        | -              | 0.000000                                    | 0.000000                                     | 0.00000D+00 0.00000D+00                    |
| 4  |      |          | 0.00        | -              | 0.000000                                    | 0.000000                                     | 0.00000D+00 0.00000D+00                    |
| 5  |      |          | 0.00        | -              | 0.000000                                    | 0.000000                                     | 0.00000D+00 0.00000D+00                    |
| 6  |      |          | 0.00        | -              | 0.000000                                    | 0.000000                                     | 0.00000D+00 0.00000D+00                    |
| 7  | a    |          | 6.29        | YES            | 0.000000                                    | 0.000001                                     | 0.45061D-21 0.32047D-21                    |
| 8  | a    |          | 14.62       | YES            | -0.000000                                   | 0.000001                                     | 0.54128D-22 0.31253D-22                    |
| 9  | a    |          | 15.55       | YES            | 0.000000                                    | 0.000000                                     | 0.81399D-23 0.58498D-23                    |
| 10 | a    |          | 48.64       | YES            | -0.000041                                   | 0.030185                                     | 0.81578D-14 0.61182D-14                    |
| 11 | a    |          | 60.39       | YES            | 0.007810                                    | 0.038287                                     | 0.12779D-13 0.65281D-14                    |
| 12 | a    |          | 89.91       | YES            | -0.000003                                   | 0.000007                                     | 0.42669D-21 0.10986D-21                    |
| 13 | a    |          | 92.54       | YES            | 0.035313                                    | 0.097638                                     | 0.63203D-13 0.19179D-13                    |
| 14 | a    |          | 105.14      | YES            | 0.000000                                    | 0.000001                                     | 0.92600D-24 0.61391D-24                    |
| 15 | a    |          | 139.07      | YES            | 0.000000                                    | 0.000000                                     | 0.21405D-24 0.16049D-24                    |
| 16 | a    |          | 192.94      | YES            | 0.000015                                    | 0.017610                                     | 0.22712D-15 0.17034D-15                    |
| 17 | a    |          | 197.27      | YES            | 0.000000                                    | 0.000001                                     | 0.13013D-23 0.83930D-24                    |
| 18 | a    |          | 217.74      | YES            | 0.000083                                    | 0.078806                                     | 0.37145D-14 0.27859D-14                    |
| 19 | a    |          | 217.96      | YES            | 0.000001                                    | 0.000031                                     | 0.57588D-21 0.43054D-21                    |
| 20 | a    |          | 221.03      | YES            | -0.000002                                   | 0.000034                                     | 0.68890D-21 0.49240D-21                    |
| 21 | a    |          | 221.23      | YES            | -0.004338                                   | 0.064743                                     | 0.25652D-14 0.18314D-14                    |
| 22 | a    |          | 287.33      | YES            | -0.000001                                   | 0.121689                                     | 0.56448D-14 0.42336D-14                    |
| 23 | a    |          | 287.92      | YES            | -0.000000                                   | 0.000011                                     | 0.46855D-22 0.34961D-22                    |
| 24 | a    |          | 307.36      | YES            | -0.000000                                   | 0.000013                                     | 0.57060D-22 0.42700D-22                    |
| 25 | a    |          | 308.55      | YES            | -0.007328                                   | 0.123367                                     | 0.53900D-14 0.38882D-14                    |
| 26 | a    |          | 346.17      | YES            | -0.000016                                   | 0.000061                                     | 0.19159D-20 0.79025D-21                    |
| 27 | a    |          | 346.22      | YES            | -0.031722                                   | 0.117041                                     | 0.71250D-14 0.29258D-14                    |
| 28 | a    |          | 365.72      | YES            | 0.000000                                    | 0.000004                                     | 0.38115D-23 0.24651D-23                    |
| 29 | a    |          | 370.51      | YES            | 0.000400                                    | 0.138596                                     | 0.49311D-14 0.36980D-14                    |
| 30 | a    |          | 371.89      | YES            | -0.064477                                   | 0.101034                                     | 0.14543D-13 0.19541D-14                    |
| 31 | a    |          | 374.30      | YES            | -0.000003                                   | 0.000010                                     | 0.46649D-22 0.20341D-22                    |
| 32 | a    |          | 410.16      | YES            | -0.000000                                   | 0.000003                                     | 0.27740D-23 0.17592D-23                    |
| 33 | a    |          | 410.54      | YES            | -0.018535                                   | 0.034227                                     | 0.11071D-14 0.19313D-15                    |
| 34 | a    |          | 412.68      | YES            | 0.000004                                    | 0.000007                                     | 0.49542D-22 0.79859D-23                    |
| 35 | a    |          | 412.94      | YES            | -0.060673                                   | 0.085888                                     | 0.10632D-13 0.12056D-14                    |
| 36 | a    |          | 419.50      | YES            | 0.000355                                    | 0.101214                                     | 0.21805D-14 0.16352D-14                    |
| 37 | a    |          | 420.80      | YES            | 0.000000                                    | 0.000009                                     | 0.18294D-22 0.13286D-22                    |
| 38 | a    |          | 467.23      | YES            | 0.000000                                    | 0.000003                                     | 0.13017D-23 0.97514D-24                    |
| 39 | a    |          | 468.34      | YES            | -0.065916                                   | 0.056447                                     | 0.94107D-14 0.43191D-15                    |
| 40 | a    |          | 485.78      | YES            | -0.000036                                   | 0.051260                                     | 0.45008D-15 0.33756D-15                    |
| 41 | a    |          | 485.81      | YES            | 0.000000                                    | 0.000085                                     | 0.12293D-20 0.92199D-21                    |
| 42 | a    |          | 494.59      | YES            | 0.000000                                    | 0.000004                                     | 0.27620D-23 0.19671D-23                    |
| 43 | a    |          | 509.89      | YES            | -0.139806                                   | 0.240165                                     | 0.44291D-13 0.69028D-14                    |
| 44 | a    |          | 528.26      | YES            | -0.011280                                   | 0.087258                                     | 0.13708D-14 0.86541D-15                    |
| 45 | a    |          | 533.17      | YES            | 0.000000                                    | 0.000004                                     | 0.22691D-23 0.16879D-23                    |

[Au(C<sub>6</sub>Me<sub>6</sub>)<sub>2</sub>]<sup>+</sup>

Symmetry: c1

Cartesian coordinates in Ångström:

|    |           |            |            |
|----|-----------|------------|------------|
| C  | 2.5688950 | 0.9243150  | 0.8094283  |
| C  | 2.4463260 | 0.4636975  | -0.5383429 |
| C  | 3.0896824 | 2.3206313  | 1.0335304  |
| C  | 2.0019791 | -0.8776254 | -0.7919664 |
| C  | 1.6923537 | -1.7308483 | 0.3217892  |
| C  | 1.8707805 | -1.2700327 | 1.6205922  |
| C  | 2.2581634 | 0.0742619  | 1.8655222  |
| Au | 0.0966794 | 0.3932093  | -0.7495752 |
| C  | 3.0194723 | 1.3165264  | -1.6460323 |
| C  | 2.2952989 | 0.5663423  | 3.2915186  |

|   |            |            |            |
|---|------------|------------|------------|
| C | 1.6566296  | -2.1931139 | 2.7944199  |
| C | 1.1967899  | -3.1270612 | 0.0464987  |
| C | 2.1858606  | -1.5109113 | -2.1548550 |
| C | -2.5465247 | -0.8203259 | 1.0086815  |
| C | -2.5609009 | -0.6392655 | -0.3698878 |
| C | -3.0539986 | -2.1062095 | 1.6129686  |
| C | -2.1794770 | 0.6257083  | -0.9334061 |
| C | -1.7579757 | 1.6805866  | -0.0545033 |
| C | -1.6906839 | 1.4403575  | 1.3511566  |
| C | -2.0527232 | 0.1979538  | 1.8639527  |
| C | -3.0067452 | -1.7418468 | -1.2951212 |
| C | -1.8970183 | -0.0967634 | 3.3357089  |
| C | -1.2508059 | 2.5703350  | 2.2453300  |
| C | -1.5933572 | 3.0974236  | -0.5525107 |
| C | -2.5644894 | 0.9211582  | -2.3675892 |
| H | 0.5317246  | -3.1470997 | -0.8137894 |
| H | 0.6440680  | -3.5322087 | 0.8875495  |
| H | 2.0211745  | -3.8118268 | -0.1696548 |
| H | 2.7996517  | 2.3694098  | -1.4944942 |
| H | 2.6478669  | 1.0422021  | -2.6264150 |
| H | 4.1077400  | 1.2112049  | -1.6649348 |
| H | 3.2673894  | 0.3861333  | 3.7577925  |
| H | 1.5502006  | 0.0612960  | 3.9006512  |
| H | 2.0950732  | 1.6313390  | 3.3575386  |
| H | -1.3883310 | 3.1518315  | -1.6150996 |
| H | -0.7877746 | 3.6111641  | -0.0353706 |
| H | -2.5110451 | 3.6616455  | -0.3647773 |
| H | -2.7883701 | 0.1831413  | 3.9031594  |
| H | -1.0565204 | 0.4420145  | 3.7635348  |
| H | -1.7249579 | -1.1549047 | 3.5115813  |
| H | -2.8735327 | -2.7218410 | -0.8486143 |
| H | -2.4451441 | -1.7328349 | -2.2257919 |
| H | -4.0629910 | -1.6388767 | -1.5587640 |
| H | -1.8215523 | 3.4754851  | 2.0397163  |
| H | -0.1971821 | 2.8152157  | 2.0882688  |
| H | -1.3840133 | 2.3423638  | 3.2959618  |
| H | -3.7998939 | -2.5807959 | 0.9832327  |
| H | -3.5182785 | -1.9303740 | 2.5798124  |
| H | -2.2463489 | -2.8282486 | 1.7669440  |
| H | -2.3444706 | 0.0909057  | -3.0313326 |
| H | -2.0676792 | 1.7970997  | -2.7672025 |
| H | -3.6414696 | 1.1004465  | -2.4202159 |
| H | 2.1993910  | -0.7868567 | -2.9607590 |
| H | 1.4094522  | -2.2357381 | -2.3788702 |
| H | 3.1404202  | -2.0434238 | -2.1749340 |
| H | 1.8111536  | -3.2331128 | 2.5257952  |
| H | 0.6446856  | -2.1023961 | 3.1996622  |
| H | 2.3468688  | -1.9663981 | 3.6029689  |
| H | 4.0405567  | 2.4642417  | 0.5195269  |
| H | 3.2598838  | 2.5371938  | 2.0810756  |
| H | 2.4038669  | 3.0758709  | 0.6430016  |

\$vibrational spectrum

| # | mode | symmetry | wave number | IR intensity | selection rules |       |
|---|------|----------|-------------|--------------|-----------------|-------|
| # |      |          | cm**(-1)    | km/mol       | IR              | RAMAN |
|   | 1    |          | -0.00       | 0.00000      | -               | -     |
|   | 2    |          | -0.00       | 0.00000      | -               | -     |
|   | 3    |          | -0.00       | 0.00000      | -               | -     |
|   | 4    |          | -0.00       | 0.00000      | -               | -     |
|   | 5    |          | 0.00        | 0.00000      | -               | -     |
|   | 6    |          | 0.00        | 0.00000      | -               | -     |
|   | 7    | a        | 9.67        | 0.00243      | YES             | YES   |
|   | 8    | a        | 16.15       | 0.19071      | YES             | YES   |
|   | 9    | a        | 29.48       | 0.15467      | YES             | YES   |
|   | 10   | a        | 37.57       | 0.07901      | YES             | YES   |
|   | 11   | a        | 42.61       | 0.09057      | YES             | YES   |
|   | 12   | a        | 51.41       | 0.07450      | YES             | YES   |
|   | 13   | a        | 65.08       | 0.05935      | YES             | YES   |
|   | 14   | a        | 68.30       | 0.08359      | YES             | YES   |
|   | 15   | a        | 74.31       | 0.22680      | YES             | YES   |
|   | 16   | a        | 86.72       | 0.29028      | YES             | YES   |
|   | 17   | a        | 90.98       | 0.19187      | YES             | YES   |
|   | 18   | a        | 95.88       | 0.69432      | YES             | YES   |
|   | 19   | a        | 101.42      | 0.08684      | YES             | YES   |
|   | 20   | a        | 103.50      | 0.14311      | YES             | YES   |
|   | 21   | a        | 105.08      | 0.04978      | YES             | YES   |
|   | 22   | a        | 112.09      | 0.13311      | YES             | YES   |
|   | 23   | a        | 116.75      | 0.26412      | YES             | YES   |
|   | 24   | a        | 119.98      | 0.35140      | YES             | YES   |
|   | 25   | a        | 126.83      | 0.97354      | YES             | YES   |
|   | 26   | a        | 138.16      | 0.04511      | YES             | YES   |

|     |   |         |          |     |     |
|-----|---|---------|----------|-----|-----|
| 27  | a | 142.20  | 0.05626  | YES | YES |
| 28  | a | 147.77  | 0.10746  | YES | YES |
| 29  | a | 153.19  | 0.64184  | YES | YES |
| 30  | a | 159.86  | 0.28711  | YES | YES |
| 31  | a | 171.84  | 0.30306  | YES | YES |
| 32  | a | 176.73  | 0.01866  | YES | YES |
| 33  | a | 180.24  | 0.49146  | YES | YES |
| 34  | a | 239.48  | 14.89577 | YES | YES |
| 35  | a | 244.95  | 0.40301  | YES | YES |
| 36  | a | 335.17  | 0.56928  | YES | YES |
| 37  | a | 342.42  | 1.23340  | YES | YES |
| 38  | a | 347.27  | 0.38183  | YES | YES |
| 39  | a | 349.97  | 0.25019  | YES | YES |
| 40  | a | 359.58  | 0.61788  | YES | YES |
| 41  | a | 367.67  | 0.13130  | YES | YES |
| 42  | a | 375.15  | 0.50017  | YES | YES |
| 43  | a | 400.89  | 0.96224  | YES | YES |
| 44  | a | 420.30  | 0.07417  | YES | YES |
| 45  | a | 421.67  | 0.13608  | YES | YES |
| 46  | a | 427.37  | 0.01308  | YES | YES |
| 47  | a | 429.14  | 0.01110  | YES | YES |
| 48  | a | 452.48  | 0.40090  | YES | YES |
| 49  | a | 453.12  | 0.06293  | YES | YES |
| 50  | a | 458.07  | 0.05179  | YES | YES |
| 51  | a | 458.89  | 0.17650  | YES | YES |
| 52  | a | 468.12  | 0.02351  | YES | YES |
| 53  | a | 469.72  | 0.03366  | YES | YES |
| 54  | a | 556.45  | 2.21252  | YES | YES |
| 55  | a | 558.52  | 0.97208  | YES | YES |
| 56  | a | 572.84  | 2.04703  | YES | YES |
| 57  | a | 574.57  | 3.36401  | YES | YES |
| 58  | a | 584.88  | 1.43606  | YES | YES |
| 59  | a | 587.86  | 2.52125  | YES | YES |
| 60  | a | 590.26  | 2.21827  | YES | YES |
| 61  | a | 591.85  | 0.50500  | YES | YES |
| 62  | a | 592.35  | 0.69668  | YES | YES |
| 63  | a | 598.75  | 4.77719  | YES | YES |
| 64  | a | 731.16  | 0.38522  | YES | YES |
| 65  | a | 732.16  | 2.83534  | YES | YES |
| 66  | a | 802.02  | 2.09084  | YES | YES |
| 67  | a | 803.59  | 1.39234  | YES | YES |
| 68  | a | 804.75  | 1.57784  | YES | YES |
| 69  | a | 805.77  | 4.00250  | YES | YES |
| 70  | a | 982.72  | 0.70926  | YES | YES |
| 71  | a | 983.48  | 0.45696  | YES | YES |
| 72  | a | 984.76  | 1.09291  | YES | YES |
| 73  | a | 985.75  | 2.19960  | YES | YES |
| 74  | a | 1005.74 | 0.26942  | YES | YES |
| 75  | a | 1006.89 | 2.77854  | YES | YES |
| 76  | a | 1013.04 | 6.38331  | YES | YES |
| 77  | a | 1015.13 | 1.21660  | YES | YES |
| 78  | a | 1035.15 | 0.44139  | YES | YES |
| 79  | a | 1036.93 | 6.18700  | YES | YES |
| 80  | a | 1045.25 | 7.59020  | YES | YES |
| 81  | a | 1048.03 | 14.85315 | YES | YES |
| 82  | a | 1051.84 | 1.09765  | YES | YES |
| 83  | a | 1053.83 | 8.15542  | YES | YES |
| 84  | a | 1067.56 | 2.86391  | YES | YES |
| 85  | a | 1068.63 | 9.94243  | YES | YES |
| 86  | a | 1072.58 | 1.83919  | YES | YES |
| 87  | a | 1072.81 | 4.52366  | YES | YES |
| 88  | a | 1080.60 | 2.56444  | YES | YES |
| 89  | a | 1081.67 | 8.32783  | YES | YES |
| 90  | a | 1082.69 | 3.20383  | YES | YES |
| 91  | a | 1083.15 | 13.49301 | YES | YES |
| 92  | a | 1088.69 | 0.59815  | YES | YES |
| 93  | a | 1089.28 | 2.34258  | YES | YES |
| 94  | a | 1091.24 | 0.84928  | YES | YES |
| 95  | a | 1091.88 | 0.35367  | YES | YES |
| 96  | a | 1126.07 | 0.57343  | YES | YES |
| 97  | a | 1126.66 | 0.25909  | YES | YES |
| 98  | a | 1269.05 | 4.69188  | YES | YES |
| 99  | a | 1275.37 | 1.54252  | YES | YES |
| 100 | a | 1279.85 | 0.71040  | YES | YES |
| 101 | a | 1280.50 | 0.42031  | YES | YES |
| 102 | a | 1327.63 | 34.25337 | YES | YES |
| 103 | a | 1331.82 | 12.68977 | YES | YES |
| 104 | a | 1401.75 | 3.47703  | YES | YES |
| 105 | a | 1403.36 | 8.15526  | YES | YES |
| 106 | a | 1406.69 | 1.29917  | YES | YES |
| 107 | a | 1409.05 | 7.14714  | YES | YES |



|     |   |         |          |     |     |
|-----|---|---------|----------|-----|-----|
| 108 | a | 1414.94 | 0.11761  | YES | YES |
| 109 | a | 1416.74 | 0.32639  | YES | YES |
| 110 | a | 1417.13 | 2.25761  | YES | YES |
| 111 | a | 1417.68 | 0.50452  | YES | YES |
| 112 | a | 1418.36 | 0.78088  | YES | YES |
| 113 | a | 1419.68 | 9.28826  | YES | YES |
| 114 | a | 1422.86 | 1.42768  | YES | YES |
| 115 | a | 1424.13 | 3.16939  | YES | YES |
| 116 | a | 1426.67 | 28.53613 | YES | YES |
| 117 | a | 1429.20 | 13.63515 | YES | YES |
| 118 | a | 1434.74 | 2.89192  | YES | YES |
| 119 | a | 1437.50 | 8.17178  | YES | YES |
| 120 | a | 1468.11 | 5.27617  | YES | YES |
| 121 | a | 1468.40 | 6.90923  | YES | YES |
| 122 | a | 1471.78 | 7.92001  | YES | YES |
| 123 | a | 1474.20 | 3.05358  | YES | YES |
| 124 | a | 1478.87 | 11.49052 | YES | YES |
| 125 | a | 1479.35 | 5.82074  | YES | YES |
| 126 | a | 1481.57 | 28.01760 | YES | YES |
| 127 | a | 1481.98 | 10.32553 | YES | YES |
| 128 | a | 1489.79 | 1.87182  | YES | YES |
| 129 | a | 1490.77 | 7.82975  | YES | YES |
| 130 | a | 1494.68 | 19.72434 | YES | YES |
| 131 | a | 1495.86 | 9.23847  | YES | YES |
| 132 | a | 1497.15 | 12.84151 | YES | YES |
| 133 | a | 1498.13 | 13.67916 | YES | YES |
| 134 | a | 1501.50 | 15.85350 | YES | YES |
| 135 | a | 1501.91 | 19.35409 | YES | YES |
| 136 | a | 1502.79 | 13.60096 | YES | YES |
| 137 | a | 1503.32 | 22.88500 | YES | YES |
| 138 | a | 1522.59 | 11.50743 | YES | YES |
| 139 | a | 1524.55 | 4.79796  | YES | YES |
| 140 | a | 1526.09 | 2.17819  | YES | YES |
| 141 | a | 1527.70 | 2.45328  | YES | YES |
| 142 | a | 1543.40 | 3.08639  | YES | YES |
| 143 | a | 1544.22 | 3.92365  | YES | YES |
| 144 | a | 1565.56 | 2.97200  | YES | YES |
| 145 | a | 1568.66 | 0.11569  | YES | YES |
| 146 | a | 1599.89 | 6.67412  | YES | YES |
| 147 | a | 1602.58 | 12.02636 | YES | YES |
| 148 | a | 3024.10 | 9.10746  | YES | YES |
| 149 | a | 3029.55 | 10.35504 | YES | YES |
| 150 | a | 3032.66 | 6.41581  | YES | YES |
| 151 | a | 3032.87 | 12.02241 | YES | YES |
| 152 | a | 3034.39 | 8.05612  | YES | YES |
| 153 | a | 3034.94 | 6.73402  | YES | YES |
| 154 | a | 3035.05 | 5.40082  | YES | YES |
| 155 | a | 3036.28 | 9.49750  | YES | YES |
| 156 | a | 3036.97 | 5.09717  | YES | YES |
| 157 | a | 3037.14 | 10.05048 | YES | YES |
| 158 | a | 3038.07 | 9.67029  | YES | YES |
| 159 | a | 3039.64 | 9.50707  | YES | YES |
| 160 | a | 3083.24 | 8.87557  | YES | YES |
| 161 | a | 3088.47 | 8.68790  | YES | YES |
| 162 | a | 3104.90 | 11.73753 | YES | YES |
| 163 | a | 3107.48 | 14.98363 | YES | YES |
| 164 | a | 3108.29 | 7.47424  | YES | YES |
| 165 | a | 3109.96 | 2.04923  | YES | YES |
| 166 | a | 3114.45 | 1.99567  | YES | YES |
| 167 | a | 3114.82 | 1.40618  | YES | YES |
| 168 | a | 3118.31 | 3.25620  | YES | YES |
| 169 | a | 3119.97 | 2.94253  | YES | YES |
| 170 | a | 3127.21 | 3.63871  | YES | YES |
| 171 | a | 3127.62 | 3.34902  | YES | YES |
| 172 | a | 3137.45 | 8.73006  | YES | YES |
| 173 | a | 3138.33 | 5.10996  | YES | YES |
| 174 | a | 3142.07 | 14.14351 | YES | YES |
| 175 | a | 3142.34 | 6.76430  | YES | YES |
| 176 | a | 3152.85 | 6.21024  | YES | YES |
| 177 | a | 3154.44 | 10.10724 | YES | YES |
| 178 | a | 3156.16 | 4.23729  | YES | YES |
| 179 | a | 3156.79 | 6.05291  | YES | YES |
| 180 | a | 3167.56 | 6.22548  | YES | YES |
| 181 | a | 3169.65 | 8.72514  | YES | YES |
| 182 | a | 3171.44 | 4.84798  | YES | YES |
| 183 | a | 3172.47 | 6.32892  | YES | YES |

[Au(C<sub>6</sub>Me<sub>6</sub>)(CO)]<sup>+</sup>

Symmetry: c1

Cartesian coordinates in Ångström:

Au 2.1260484 0.9075466 -0.0293723

|   |            |            |            |
|---|------------|------------|------------|
| C | -0.3232963 | -0.7865668 | -1.2224574 |
| C | -0.1700104 | 0.6119680  | -1.2452447 |
| C | -0.3694221 | -1.5655312 | -2.5129687 |
| C | -0.0770135 | 1.3435880  | -0.0047458 |
| C | -0.1408342 | 0.6206250  | 1.2419892  |
| C | -0.3169037 | -0.7748939 | 1.2278036  |
| C | -0.4701567 | -1.4574588 | 0.0070128  |
| C | -0.2481026 | 1.3725519  | -2.5446112 |
| C | -0.7996143 | -2.9260996 | 0.0183214  |
| C | -0.3921857 | -1.5390004 | 2.5242747  |
| C | -0.1496262 | 1.3594739  | 2.5560706  |
| C | -0.3116749 | 2.8457193  | -0.0154730 |
| C | 4.0577553  | 0.7357867  | -0.0481126 |
| O | 5.1786646  | 0.6739593  | -0.0590688 |
| H | -0.0279663 | 3.2996316  | -0.9576182 |
| H | 0.2261614  | 3.3662718  | 0.7699329  |
| H | -1.3767343 | 3.0387856  | 0.1336206  |
| H | 0.0548409  | 2.4172452  | 2.4477543  |
| H | 0.5790504  | 0.9519800  | 3.2539223  |
| H | -1.1298732 | 1.2612313  | 3.0276335  |
| H | 0.0901322  | -2.5101925 | 2.4420229  |
| H | -1.4313278 | -1.7170003 | 2.8138207  |
| H | 0.0800609  | -1.0065662 | 3.3426890  |
| H | -1.4342501 | -3.1965393 | -0.8210183 |
| H | -1.3195294 | -3.2127963 | 0.9267776  |
| H | 0.1051025  | -3.5378875 | -0.0469061 |
| H | 0.3299269  | -1.1671672 | -3.2436425 |
| H | -1.3636876 | -1.5328714 | -2.9656195 |
| H | -0.1123859 | -2.6085964 | -2.3616885 |
| H | -0.0495149 | 0.7424272  | -3.4029599 |
| H | 0.4418690  | 2.2109068  | -2.5845817 |
| H | -1.2555022 | 1.7794694  | -2.6675571 |

\$vibrational spectrum

| # | mode | symmetry | wave number | IR intensity | selection rules |       |
|---|------|----------|-------------|--------------|-----------------|-------|
| # |      |          | cm**(-1)    | km/mol       | IR              | RAMAN |
|   | 1    | a        | -3.23       | 0.00000      | YES             | YES   |
|   | 2    |          | 0.00        | 0.00000      | -               | -     |
|   | 3    |          | 0.00        | 0.00000      | -               | -     |
|   | 4    |          | 0.00        | 0.00000      | -               | -     |
|   | 5    |          | 0.00        | 0.00000      | -               | -     |
|   | 6    |          | 0.00        | 0.00000      | -               | -     |
|   | 7    |          | 0.00        | 0.00000      | -               | -     |
|   | 8    | a        | 37.52       | 0.03791      | YES             | YES   |
|   | 9    | a        | 42.92       | 0.00542      | YES             | YES   |
|   | 10   | a        | 54.06       | 0.14960      | YES             | YES   |
|   | 11   | a        | 62.58       | 0.40674      | YES             | YES   |
|   | 12   | a        | 73.61       | 0.20094      | YES             | YES   |
|   | 13   | a        | 93.76       | 0.12320      | YES             | YES   |
|   | 14   | a        | 102.66      | 0.22278      | YES             | YES   |
|   | 15   | a        | 117.62      | 0.47821      | YES             | YES   |
|   | 16   | a        | 120.58      | 0.03826      | YES             | YES   |
|   | 17   | a        | 128.43      | 0.74654      | YES             | YES   |
|   | 18   | a        | 135.97      | 0.06364      | YES             | YES   |
|   | 19   | a        | 156.29      | 0.47401      | YES             | YES   |
|   | 20   | a        | 168.38      | 0.04742      | YES             | YES   |
|   | 21   | a        | 244.45      | 10.13613     | YES             | YES   |
|   | 22   | a        | 333.03      | 0.18876      | YES             | YES   |
|   | 23   | a        | 351.76      | 2.23449      | YES             | YES   |
|   | 24   | a        | 362.22      | 1.47335      | YES             | YES   |
|   | 25   | a        | 373.27      | 9.96958      | YES             | YES   |
|   | 26   | a        | 396.32      | 3.54898      | YES             | YES   |
|   | 27   | a        | 399.68      | 7.56579      | YES             | YES   |
|   | 28   | a        | 415.92      | 1.07713      | YES             | YES   |
|   | 29   | a        | 421.57      | 9.40914      | YES             | YES   |
|   | 30   | a        | 426.84      | 1.70777      | YES             | YES   |
|   | 31   | a        | 453.74      | 0.04135      | YES             | YES   |
|   | 32   | a        | 454.54      | 0.64486      | YES             | YES   |
|   | 33   | a        | 464.82      | 0.01647      | YES             | YES   |
|   | 34   | a        | 560.31      | 3.27026      | YES             | YES   |
|   | 35   | a        | 579.83      | 0.55918      | YES             | YES   |
|   | 36   | a        | 588.02      | 1.18270      | YES             | YES   |
|   | 37   | a        | 590.15      | 3.02330      | YES             | YES   |
|   | 38   | a        | 598.75      | 1.76400      | YES             | YES   |
|   | 39   | a        | 723.34      | 8.15820      | YES             | YES   |
|   | 40   | a        | 801.69      | 2.02932      | YES             | YES   |
|   | 41   | a        | 806.44      | 3.22852      | YES             | YES   |
|   | 42   | a        | 984.30      | 1.09575      | YES             | YES   |
|   | 43   | a        | 985.19      | 0.49376      | YES             | YES   |
|   | 44   | a        | 1008.97     | 1.28661      | YES             | YES   |
|   | 45   | a        | 1011.97     | 2.93848      | YES             | YES   |

|    |   |         |           |     |     |
|----|---|---------|-----------|-----|-----|
| 46 | a | 1036.24 | 6.74646   | YES | YES |
| 47 | a | 1046.95 | 1.34054   | YES | YES |
| 48 | a | 1051.66 | 11.05775  | YES | YES |
| 49 | a | 1063.63 | 1.03455   | YES | YES |
| 50 | a | 1071.74 | 9.90991   | YES | YES |
| 51 | a | 1077.13 | 5.12788   | YES | YES |
| 52 | a | 1082.86 | 13.17563  | YES | YES |
| 53 | a | 1090.30 | 5.93459   | YES | YES |
| 54 | a | 1092.02 | 1.99744   | YES | YES |
| 55 | a | 1128.10 | 0.23128   | YES | YES |
| 56 | a | 1278.59 | 4.02393   | YES | YES |
| 57 | a | 1291.16 | 23.74921  | YES | YES |
| 58 | a | 1307.26 | 6.91192   | YES | YES |
| 59 | a | 1399.47 | 11.72633  | YES | YES |
| 60 | a | 1410.19 | 19.68058  | YES | YES |
| 61 | a | 1416.59 | 0.21413   | YES | YES |
| 62 | a | 1417.31 | 3.80057   | YES | YES |
| 63 | a | 1419.31 | 2.80645   | YES | YES |
| 64 | a | 1426.84 | 10.00741  | YES | YES |
| 65 | a | 1428.59 | 12.49069  | YES | YES |
| 66 | a | 1435.75 | 3.71590   | YES | YES |
| 67 | a | 1462.72 | 3.19318   | YES | YES |
| 68 | a | 1471.26 | 0.51926   | YES | YES |
| 69 | a | 1476.74 | 14.76611  | YES | YES |
| 70 | a | 1482.97 | 5.16349   | YES | YES |
| 71 | a | 1489.02 | 19.49329  | YES | YES |
| 72 | a | 1492.89 | 13.27110  | YES | YES |
| 73 | a | 1496.23 | 22.45716  | YES | YES |
| 74 | a | 1503.14 | 17.24392  | YES | YES |
| 75 | a | 1507.10 | 2.21529   | YES | YES |
| 76 | a | 1522.36 | 12.77343  | YES | YES |
| 77 | a | 1526.05 | 20.97222  | YES | YES |
| 78 | a | 1539.47 | 7.88493   | YES | YES |
| 79 | a | 1563.18 | 1.74660   | YES | YES |
| 80 | a | 1574.22 | 17.80756  | YES | YES |
| 81 | a | 2240.87 | 649.75328 | YES | YES |
| 82 | a | 3030.64 | 1.92763   | YES | YES |
| 83 | a | 3037.14 | 2.77978   | YES | YES |
| 84 | a | 3038.26 | 1.88385   | YES | YES |
| 85 | a | 3039.68 | 3.23291   | YES | YES |
| 86 | a | 3044.33 | 2.85989   | YES | YES |
| 87 | a | 3047.27 | 2.18858   | YES | YES |
| 88 | a | 3104.65 | 1.45204   | YES | YES |
| 89 | a | 3108.18 | 6.81319   | YES | YES |
| 90 | a | 3112.08 | 4.09943   | YES | YES |
| 91 | a | 3116.45 | 4.08058   | YES | YES |
| 92 | a | 3117.73 | 1.06348   | YES | YES |
| 93 | a | 3131.34 | 1.78329   | YES | YES |
| 94 | a | 3148.06 | 7.66133   | YES | YES |
| 95 | a | 3154.61 | 10.54329  | YES | YES |
| 96 | a | 3157.64 | 0.73278   | YES | YES |
| 97 | a | 3166.27 | 8.23086   | YES | YES |
| 98 | a | 3172.72 | 4.83146   | YES | YES |
| 99 | a | 3177.51 | 4.21254   | YES | YES |

C<sub>6</sub>Me<sub>6</sub>

Symmetry: d3d

Cartesian coordinates in Ångström:

|   |            |            |            |
|---|------------|------------|------------|
| C | 1.2138902  | -0.7008398 | 0.0107135  |
| C | 1.2138902  | 0.7008398  | -0.0107135 |
| C | -1.2138902 | 0.7008398  | -0.0107135 |
| C | -1.2138902 | -0.7008398 | 0.0107135  |
| C | -0.0000000 | -1.4016797 | -0.0107135 |
| C | 2.5217589  | -1.4559382 | 0.0808806  |
| C | 0.0000000  | -2.9118763 | -0.0808806 |
| C | -0.0000000 | 1.4016797  | 0.0107135  |
| C | 2.5217589  | 1.4559382  | -0.0808806 |
| C | 0.0000000  | 2.9118763  | 0.0808806  |
| C | -2.5217589 | 1.4559382  | -0.0808806 |
| C | -2.5217589 | -1.4559382 | 0.0808806  |
| H | 3.2832483  | 0.8862390  | -0.6084250 |
| H | 2.9194253  | 1.6855310  | 0.9130768  |
| H | 2.4091296  | 2.4002570  | -0.6084250 |
| H | 3.2832483  | -0.8862390 | 0.6084250  |
| H | 2.9194253  | -1.6855310 | -0.9130768 |
| H | 2.4091296  | -2.4002570 | 0.6084250  |
| H | -0.8741187 | -3.2864959 | -0.6084250 |
| H | 0.0000000  | -3.3710620 | 0.9130768  |
| H | 0.8741187  | -3.2864959 | -0.6084250 |
| H | -3.2832483 | -0.8862390 | 0.6084250  |
| H | -2.4091296 | -2.4002570 | 0.6084250  |

|   |            |            |            |
|---|------------|------------|------------|
| H | -2.9194253 | -1.6855310 | -0.9130768 |
| H | -3.2832483 | 0.8862390  | -0.6084250 |
| H | -2.4091296 | 2.4002570  | -0.6084250 |
| H | -2.9194253 | 1.6855310  | 0.9130768  |
| H | 0.8741187  | 3.2864959  | 0.6084250  |
| H | -0.8741187 | 3.2864959  | 0.6084250  |
| H | 0.0000000  | 3.3710620  | -0.9130768 |

\$vibrational spectrum

| #  | mode | symmetry | wave number<br>cm**(-1) | IR intensity<br>km/mol | selection rules |       |
|----|------|----------|-------------------------|------------------------|-----------------|-------|
| #  |      |          |                         |                        | IR              | RAMAN |
| 1  |      |          | -0.00                   | 0.00000                | -               | -     |
| 2  |      |          | -0.00                   | 0.00000                | -               | -     |
| 3  |      |          | 0.00                    | 0.00000                | -               | -     |
| 4  |      |          | 0.00                    | 0.00000                | -               | -     |
| 5  |      |          | 0.00                    | 0.00000                | -               | -     |
| 6  |      |          | 0.00                    | 0.00000                | -               | -     |
| 7  |      | eu       | 85.02                   | 0.00035                | YES             | NO    |
| 8  |      | eu       | 85.02                   | 0.00035                | YES             | NO    |
| 9  |      | a2g      | 86.51                   | 0.00000                | NO              | NO    |
| 10 |      | a1u      | 98.54                   | 0.00000                | NO              | NO    |
| 11 |      | eg       | 104.15                  | 0.00000                | NO              | YES   |
| 12 |      | eg       | 104.15                  | 0.00000                | NO              | YES   |
| 13 |      | eu       | 131.45                  | 0.06135                | YES             | NO    |
| 14 |      | eu       | 131.45                  | 0.06135                | YES             | NO    |
| 15 |      | a1g      | 166.30                  | 0.00000                | NO              | YES   |
| 16 |      | a2u      | 197.58                  | 6.75120                | YES             | NO    |
| 17 |      | eu       | 348.45                  | 1.16095                | YES             | NO    |
| 18 |      | eu       | 348.45                  | 1.16095                | YES             | NO    |
| 19 |      | eg       | 354.67                  | 0.00000                | NO              | YES   |
| 20 |      | eg       | 354.67                  | 0.00000                | NO              | YES   |
| 21 |      | eg       | 415.20                  | 0.00000                | NO              | YES   |
| 22 |      | eg       | 415.20                  | 0.00000                | NO              | YES   |
| 23 |      | a1u      | 456.97                  | 0.00000                | NO              | NO    |
| 24 |      | eg       | 460.32                  | 0.00000                | NO              | YES   |
| 25 |      | eg       | 460.32                  | 0.00000                | NO              | YES   |
| 26 |      | a1g      | 561.41                  | 0.00000                | NO              | YES   |
| 27 |      | eu       | 592.19                  | 1.60763                | YES             | NO    |
| 28 |      | eu       | 592.19                  | 1.60763                | YES             | NO    |
| 29 |      | a2g      | 592.72                  | 0.00000                | NO              | NO    |
| 30 |      | a2u      | 595.01                  | 0.38288                | YES             | NO    |
| 31 |      | a1g      | 748.01                  | 0.00000                | NO              | YES   |
| 32 |      | eu       | 814.61                  | 0.60578                | YES             | NO    |
| 33 |      | eu       | 814.61                  | 0.60578                | YES             | NO    |
| 34 |      | eg       | 992.77                  | 0.00000                | NO              | YES   |
| 35 |      | eg       | 992.77                  | 0.00000                | NO              | YES   |
| 36 |      | a1u      | 999.65                  | 0.00000                | NO              | NO    |
| 37 |      | a2u      | 1012.34                 | 0.69413                | YES             | NO    |
| 38 |      | eg       | 1037.59                 | 0.00000                | NO              | YES   |
| 39 |      | eg       | 1037.59                 | 0.00000                | NO              | YES   |
| 40 |      | eu       | 1067.15                 | 7.77466                | YES             | NO    |
| 41 |      | eu       | 1067.15                 | 7.77466                | YES             | NO    |
| 42 |      | a1g      | 1074.08                 | 0.00000                | NO              | YES   |
| 43 |      | eu       | 1081.78                 | 11.66672               | YES             | NO    |
| 44 |      | eu       | 1081.78                 | 11.66672               | YES             | NO    |
| 45 |      | eg       | 1090.03                 | 0.00000                | NO              | YES   |
| 46 |      | eg       | 1090.03                 | 0.00000                | NO              | YES   |
| 47 |      | a2g      | 1122.76                 | 0.00000                | NO              | NO    |
| 48 |      | a2u      | 1271.22                 | 0.01202                | YES             | NO    |
| 49 |      | a1u      | 1311.47                 | 0.00000                | NO              | NO    |
| 50 |      | a1g      | 1328.27                 | 0.00000                | NO              | YES   |
| 51 |      | eg       | 1412.12                 | 0.00000                | NO              | YES   |
| 52 |      | eg       | 1412.12                 | 0.00000                | NO              | YES   |
| 53 |      | a2u      | 1412.61                 | 0.53244                | YES             | NO    |
| 54 |      | eu       | 1419.42                 | 1.50491                | YES             | NO    |
| 55 |      | eu       | 1419.42                 | 1.50491                | YES             | NO    |
| 56 |      | a1g      | 1427.38                 | 0.00000                | NO              | YES   |
| 57 |      | eu       | 1445.00                 | 1.13057                | YES             | NO    |
| 58 |      | eu       | 1445.00                 | 1.13057                | YES             | NO    |
| 59 |      | eg       | 1475.63                 | 0.00000                | NO              | YES   |
| 60 |      | eg       | 1475.63                 | 0.00000                | NO              | YES   |
| 61 |      | a2u      | 1484.55                 | 34.19450               | YES             | NO    |
| 62 |      | a1u      | 1486.82                 | 0.00000                | NO              | NO    |
| 63 |      | a2g      | 1499.25                 | 0.00000                | NO              | NO    |
| 64 |      | eg       | 1502.14                 | 0.00000                | NO              | YES   |
| 65 |      | eg       | 1502.14                 | 0.00000                | NO              | YES   |
| 66 |      | eu       | 1508.53                 | 31.29921               | YES             | NO    |
| 67 |      | eu       | 1508.53                 | 31.29921               | YES             | NO    |
| 68 |      | eu       | 1528.24                 | 0.61344                | YES             | NO    |
| 69 |      | eu       | 1528.24                 | 0.61344                | YES             | NO    |
| 70 |      | a1g      | 1541.84                 | 0.00000                | NO              | YES   |

|    |     |         |          |     |     |
|----|-----|---------|----------|-----|-----|
| 71 | eg  | 1616.41 | 0.00000  | NO  | YES |
| 72 | eg  | 1616.41 | 0.00000  | NO  | YES |
| 73 | eu  | 3012.34 | 85.35179 | YES | NO  |
| 74 | eu  | 3012.34 | 85.35179 | YES | NO  |
| 75 | eg  | 3012.55 | 0.00000  | NO  | YES |
| 76 | eg  | 3012.55 | 0.00000  | NO  | YES |
| 77 | a2u | 3013.10 | 32.93508 | YES | NO  |
| 78 | a1g | 3013.49 | 0.00000  | NO  | YES |
| 79 | a2u | 3088.31 | 81.74306 | YES | NO  |
| 80 | eg  | 3090.29 | 0.00000  | NO  | YES |
| 81 | eg  | 3090.29 | 0.00000  | NO  | YES |
| 82 | eu  | 3096.00 | 7.33856  | YES | NO  |
| 83 | eu  | 3096.00 | 7.33856  | YES | NO  |
| 84 | a1g | 3100.91 | 0.00000  | NO  | YES |
| 85 | a2g | 3114.06 | 0.00000  | NO  | NO  |
| 86 | eu  | 3120.38 | 60.31859 | YES | NO  |
| 87 | eu  | 3120.38 | 60.31859 | YES | NO  |
| 88 | eg  | 3127.78 | 0.00000  | NO  | YES |
| 89 | eg  | 3127.78 | 0.00000  | NO  | YES |
| 90 | a1u | 3130.32 | 0.00000  | NO  | NO  |

[C<sub>6</sub>Me<sub>6</sub>]<sup>+</sup>

Symmetry: c1

Cartesian coordinates in Ångström:

|   |            |            |            |
|---|------------|------------|------------|
| C | 3.7447557  | 1.3903158  | 0.1458403  |
| C | 2.3317578  | 1.5898861  | 0.0250469  |
| C | 2.1514527  | -0.7342625 | -0.6623159 |
| C | 3.5643441  | -0.9338683 | -0.5412767 |
| C | 4.3625149  | 0.1399510  | -0.2107144 |
| C | 4.5896404  | 2.4839294  | 0.6942592  |
| C | 5.8596883  | 0.0351707  | -0.2044021 |
| C | 1.5336567  | 0.5162241  | -0.3059893 |
| C | 1.7541205  | 2.9532796  | 0.2810736  |
| C | 0.0364695  | 0.6205283  | -0.3131291 |
| C | 1.3061151  | -1.8275238 | -1.2107291 |
| C | 4.1423350  | -2.2972475 | -0.7965633 |
| H | 2.4277514  | 3.7389171  | -0.0532550 |
| H | 1.5686683  | 3.1147519  | 1.3469671  |
| H | 0.8117190  | 3.0893639  | -0.2400087 |
| H | 4.0358894  | 3.1302371  | 1.3690703  |
| H | 4.9478591  | 3.1182348  | -0.1284334 |
| H | 5.4708924  | 2.1059009  | 1.2044929  |
| H | 6.2065018  | -0.7482293 | -0.8707259 |
| H | 6.2370652  | -0.1929372 | 0.7971893  |
| H | 6.3254473  | 0.9659494  | -0.5200950 |
| H | 3.4685354  | -3.0829242 | -0.4626956 |
| H | 5.0842829  | -2.4330092 | -0.2745408 |
| H | 4.3289013  | -2.4588836 | -1.8622429 |
| H | 1.8605862  | -2.4776358 | -1.8811449 |
| H | 0.4280443  | -1.4484100 | -1.7257963 |
| H | 0.9420896  | -2.4577318 | -0.3874371 |
| H | -0.3110878 | 1.4061665  | 0.3500937  |
| H | -0.4288625 | -0.3093975 | 0.0058430  |
| H | -0.3406839 | 0.8444840  | -1.3157305 |

\$vibrational spectrum

| # | mode | symmetry | wave number | IR intensity | selection rules |
|---|------|----------|-------------|--------------|-----------------|
| # |      |          | cm**(-1)    | km/mol       | IR RAMAN        |
|   | 1    |          | -0.00       | 0.00000      | - -             |
|   | 2    |          | -0.00       | 0.00000      | - -             |
|   | 3    |          | 0.00        | 0.00000      | - -             |
|   | 4    |          | 0.00        | 0.00000      | - -             |
|   | 5    |          | 0.00        | 0.00000      | - -             |
|   | 6    |          | 0.00        | 0.00000      | - -             |
|   | 7    | a        | 63.16       | 0.45929      | YES YES         |
|   | 8    | a        | 84.59       | 0.05201      | YES YES         |
|   | 9    | a        | 105.73      | 0.00065      | YES YES         |
|   | 10   | a        | 114.08      | 0.00008      | YES YES         |
|   | 11   | a        | 121.87      | 1.55405      | YES YES         |
|   | 12   | a        | 133.64      | 0.00009      | YES YES         |
|   | 13   | a        | 145.35      | 0.03158      | YES YES         |
|   | 14   | a        | 147.63      | 0.00010      | YES YES         |
|   | 15   | a        | 153.38      | 0.46471      | YES YES         |
|   | 16   | a        | 180.11      | 0.00003      | YES YES         |
|   | 17   | a        | 201.25      | 4.59352      | YES YES         |
|   | 18   | a        | 337.19      | 0.57870      | YES YES         |
|   | 19   | a        | 356.42      | 0.19834      | YES YES         |
|   | 20   | a        | 363.23      | 0.00000      | YES YES         |
|   | 21   | a        | 371.99      | 0.00000      | YES YES         |
|   | 22   | a        | 402.59      | 0.00001      | YES YES         |
|   | 23   | a        | 405.21      | 0.00000      | YES YES         |

|    |   |         |           |     |     |
|----|---|---------|-----------|-----|-----|
| 24 | a | 441.73  | 0.20622   | YES | YES |
| 25 | a | 448.75  | 0.00000   | YES | YES |
| 26 | a | 553.66  | 0.00000   | YES | YES |
| 27 | a | 576.10  | 2.15230   | YES | YES |
| 28 | a | 582.52  | 4.00251   | YES | YES |
| 29 | a | 589.78  | 2.14574   | YES | YES |
| 30 | a | 592.99  | 0.00035   | YES | YES |
| 31 | a | 706.22  | 0.00001   | YES | YES |
| 32 | a | 810.02  | 3.83623   | YES | YES |
| 33 | a | 812.27  | 0.41456   | YES | YES |
| 34 | a | 857.95  | 0.00007   | YES | YES |
| 35 | a | 968.49  | 19.83305  | YES | YES |
| 36 | a | 981.12  | 0.00001   | YES | YES |
| 37 | a | 1000.74 | 0.00149   | YES | YES |
| 38 | a | 1008.74 | 0.00006   | YES | YES |
| 39 | a | 1014.01 | 5.74312   | YES | YES |
| 40 | a | 1036.61 | 67.84909  | YES | YES |
| 41 | a | 1061.68 | 7.41626   | YES | YES |
| 42 | a | 1072.16 | 0.00001   | YES | YES |
| 43 | a | 1086.75 | 0.00539   | YES | YES |
| 44 | a | 1091.52 | 19.26711  | YES | YES |
| 45 | a | 1093.32 | 39.30604  | YES | YES |
| 46 | a | 1105.90 | 0.00015   | YES | YES |
| 47 | a | 1127.42 | 0.00017   | YES | YES |
| 48 | a | 1263.10 | 0.00191   | YES | YES |
| 49 | a | 1289.85 | 0.73704   | YES | YES |
| 50 | a | 1320.44 | 0.00100   | YES | YES |
| 51 | a | 1327.33 | 204.01416 | YES | YES |
| 52 | a | 1346.12 | 106.55491 | YES | YES |
| 53 | a | 1387.69 | 0.00727   | YES | YES |
| 54 | a | 1388.92 | 39.62255  | YES | YES |
| 55 | a | 1415.01 | 0.00020   | YES | YES |
| 56 | a | 1418.44 | 20.99184  | YES | YES |
| 57 | a | 1421.11 | 19.63629  | YES | YES |
| 58 | a | 1424.28 | 0.00011   | YES | YES |
| 59 | a | 1444.79 | 0.68422   | YES | YES |
| 60 | a | 1448.55 | 0.00114   | YES | YES |
| 61 | a | 1460.71 | 0.00006   | YES | YES |
| 62 | a | 1466.42 | 0.39650   | YES | YES |
| 63 | a | 1480.31 | 60.98460  | YES | YES |
| 64 | a | 1483.62 | 0.02283   | YES | YES |
| 65 | a | 1487.68 | 66.46315  | YES | YES |
| 66 | a | 1495.36 | 0.00057   | YES | YES |
| 67 | a | 1498.04 | 0.00002   | YES | YES |
| 68 | a | 1516.42 | 4.64376   | YES | YES |
| 69 | a | 1517.74 | 49.71075  | YES | YES |
| 70 | a | 1532.49 | 48.93172  | YES | YES |
| 71 | a | 1535.17 | 0.00102   | YES | YES |
| 72 | a | 1640.70 | 0.00012   | YES | YES |
| 73 | a | 2987.92 | 48.63101  | YES | YES |
| 74 | a | 2988.90 | 0.00122   | YES | YES |
| 75 | a | 3026.88 | 0.00241   | YES | YES |
| 76 | a | 3027.70 | 0.77169   | YES | YES |
| 77 | a | 3031.06 | 0.00089   | YES | YES |
| 78 | a | 3031.71 | 0.43453   | YES | YES |
| 79 | a | 3106.20 | 5.93714   | YES | YES |
| 80 | a | 3107.22 | 0.01177   | YES | YES |
| 81 | a | 3107.91 | 0.00277   | YES | YES |
| 82 | a | 3110.06 | 2.96084   | YES | YES |
| 83 | a | 3111.36 | 4.70894   | YES | YES |
| 84 | a | 3112.34 | 0.00232   | YES | YES |
| 85 | a | 3143.77 | 0.04353   | YES | YES |
| 86 | a | 3144.58 | 4.04560   | YES | YES |
| 87 | a | 3154.16 | 7.40378   | YES | YES |
| 88 | a | 3156.22 | 0.02062   | YES | YES |
| 89 | a | 3156.27 | 0.00410   | YES | YES |
| 90 | a | 3157.98 | 0.31671   | YES | YES |

[Au(Mes)<sub>2</sub>]<sup>+</sup>

Symmetry: c2

Cartesian coordinates in Ångström:

|    |            |            |            |
|----|------------|------------|------------|
| C  | 2.9790619  | 0.8416479  | 0.3301836  |
| C  | 2.6720287  | 0.5491209  | -0.9909386 |
| H  | 3.4088739  | 1.8059018  | 0.5697234  |
| C  | 2.0922902  | -0.7238523 | -1.2892103 |
| C  | 1.9231516  | -1.6986733 | -0.2572480 |
| C  | 2.2496972  | -1.3454486 | 1.0449843  |
| C  | 2.7775310  | -0.0889780 | 1.3536635  |
| Au | -0.0000000 | 0.0000000  | -1.1617563 |
| C  | 3.0235500  | 1.4979395  | -2.0991897 |
| C  | 3.1069026  | 0.2660395  | 2.7724593  |

|   |            |            |            |
|---|------------|------------|------------|
| H | 2.1162986  | -2.0717674 | 1.8365002  |
| C | 1.4932487  | -3.0957146 | -0.5980742 |
| H | 2.1030265  | -1.0638253 | -2.3202232 |
| C | -2.9790619 | -0.8416479 | 0.3301836  |
| C | -2.6720287 | -0.5491209 | -0.9909386 |
| H | -3.4088739 | -1.8059018 | 0.5697234  |
| C | -2.0922902 | 0.7238523  | -1.2892103 |
| C | -1.9231516 | 1.6986733  | -0.2572480 |
| C | -2.2496972 | 1.3454486  | 1.0449843  |
| C | -2.7775310 | 0.0889780  | 1.3536635  |
| C | -3.0235500 | -1.4979395 | -2.0991897 |
| C | -3.1069026 | -0.2660395 | 2.7724593  |
| H | -2.1162986 | 2.0717674  | 1.8365002  |
| C | -1.4932487 | 3.0957146  | -0.5980742 |
| H | -2.1030265 | 1.0638253  | -2.3202232 |
| H | 0.9856186  | -3.1418528 | -1.5595213 |
| H | 0.8352987  | -3.5072792 | 0.1659364  |
| H | 2.3711652  | -3.7437353 | -0.6549981 |
| H | 2.8800582  | 2.5342738  | -1.7971564 |
| H | 2.4383433  | 1.3100642  | -2.9972691 |
| H | 4.0778710  | 1.3781303  | -2.3604554 |
| H | 3.9370481  | 0.9687880  | 2.8247819  |
| H | 3.3572550  | -0.6173053 | 3.3575394  |
| H | 2.2459610  | 0.7424939  | 3.2493905  |
| H | -0.9856186 | 3.1418528  | -1.5595213 |
| H | -0.8352987 | 3.5072792  | 0.1659364  |
| H | -2.3711652 | 3.7437353  | -0.6549981 |
| H | -3.9370481 | -0.9687880 | 2.8247819  |
| H | -3.3572550 | 0.6173053  | 3.3575394  |
| H | -2.2459610 | -0.7424939 | 3.2493905  |
| H | -2.8800582 | -2.5342738 | -1.7971564 |
| H | -2.4383433 | -1.3100642 | -2.9972691 |
| H | -4.0778710 | -1.3781303 | -2.3604554 |

\$vibrational spectrum

| #  | mode | symmetry | wave number<br>cm**(-1) | IR intensity<br>km/mol | selection rules<br>IR | RAMAN |
|----|------|----------|-------------------------|------------------------|-----------------------|-------|
| #  |      |          |                         |                        |                       |       |
| 1  |      |          | 0.00                    | 0.00000                | -                     | -     |
| 2  |      |          | 0.00                    | 0.00000                | -                     | -     |
| 3  |      |          | 0.00                    | 0.00000                | -                     | -     |
| 4  |      |          | 0.00                    | 0.00000                | -                     | -     |
| 5  |      |          | 0.00                    | 0.00000                | -                     | -     |
| 6  |      |          | 0.00                    | 0.00000                | -                     | -     |
| 7  |      | a        | 4.60                    | 0.00940                | YES                   | YES   |
| 8  |      | a        | 24.63                   | 0.09075                | YES                   | YES   |
| 9  |      | b        | 31.39                   | 0.31892                | YES                   | YES   |
| 10 |      | b        | 41.65                   | 0.10346                | YES                   | YES   |
| 11 |      | a        | 45.36                   | 0.00014                | YES                   | YES   |
| 12 |      | b        | 56.04                   | 0.94264                | YES                   | YES   |
| 13 |      | a        | 67.55                   | 0.17461                | YES                   | YES   |
| 14 |      | b        | 70.52                   | 0.03632                | YES                   | YES   |
| 15 |      | a        | 80.75                   | 2.36508                | YES                   | YES   |
| 16 |      | a        | 97.94                   | 0.00133                | YES                   | YES   |
| 17 |      | b        | 103.37                  | 1.88093                | YES                   | YES   |
| 18 |      | a        | 112.57                  | 0.09352                | YES                   | YES   |
| 19 |      | b        | 113.41                  | 0.66451                | YES                   | YES   |
| 20 |      | a        | 128.35                  | 0.01960                | YES                   | YES   |
| 21 |      | b        | 150.31                  | 1.50523                | YES                   | YES   |
| 22 |      | a        | 185.03                  | 0.45194                | YES                   | YES   |
| 23 |      | b        | 186.36                  | 4.99854                | YES                   | YES   |
| 24 |      | a        | 206.70                  | 0.06499                | YES                   | YES   |
| 25 |      | b        | 209.61                  | 0.54121                | YES                   | YES   |
| 26 |      | b        | 272.99                  | 0.07989                | YES                   | YES   |
| 27 |      | a        | 274.17                  | 0.00330                | YES                   | YES   |
| 28 |      | a        | 277.10                  | 0.01110                | YES                   | YES   |
| 29 |      | b        | 277.22                  | 0.25166                | YES                   | YES   |
| 30 |      | b        | 352.43                  | 36.27245               | YES                   | YES   |
| 31 |      | a        | 380.18                  | 0.50495                | YES                   | YES   |
| 32 |      | b        | 462.73                  | 0.24944                | YES                   | YES   |
| 33 |      | a        | 462.97                  | 0.02010                | YES                   | YES   |
| 34 |      | a        | 507.23                  | 0.00118                | YES                   | YES   |
| 35 |      | b        | 507.36                  | 0.01780                | YES                   | YES   |
| 36 |      | b        | 514.30                  | 6.10801                | YES                   | YES   |
| 37 |      | a        | 515.99                  | 0.01046                | YES                   | YES   |
| 38 |      | a        | 544.64                  | 0.03510                | YES                   | YES   |
| 39 |      | b        | 544.79                  | 0.07974                | YES                   | YES   |
| 40 |      | b        | 549.31                  | 12.77103               | YES                   | YES   |
| 41 |      | a        | 553.34                  | 0.90646                | YES                   | YES   |
| 42 |      | a        | 581.18                  | 0.18817                | YES                   | YES   |
| 43 |      | b        | 581.33                  | 0.01283                | YES                   | YES   |
| 44 |      | b        | 714.52                  | 1.03977                | YES                   | YES   |

|     |   |         |           |     |     |
|-----|---|---------|-----------|-----|-----|
| 45  | a | 719.35  | 4.53615   | YES | YES |
| 46  | b | 876.86  | 98.97473  | YES | YES |
| 47  | a | 878.63  | 2.14027   | YES | YES |
| 48  | b | 914.95  | 69.41851  | YES | YES |
| 49  | a | 920.46  | 0.00000   | YES | YES |
| 50  | b | 920.97  | 0.69705   | YES | YES |
| 51  | a | 933.82  | 17.03453  | YES | YES |
| 52  | a | 940.46  | 0.00110   | YES | YES |
| 53  | b | 940.78  | 0.04243   | YES | YES |
| 54  | b | 943.72  | 6.92082   | YES | YES |
| 55  | a | 944.59  | 1.57815   | YES | YES |
| 56  | b | 1002.97 | 10.63250  | YES | YES |
| 57  | a | 1004.52 | 0.33833   | YES | YES |
| 58  | a | 1030.60 | 0.14598   | YES | YES |
| 59  | b | 1030.95 | 2.94462   | YES | YES |
| 60  | a | 1039.86 | 0.37147   | YES | YES |
| 61  | b | 1039.92 | 11.18032  | YES | YES |
| 62  | a | 1042.11 | 0.07425   | YES | YES |
| 63  | b | 1042.80 | 0.44319   | YES | YES |
| 64  | a | 1057.36 | 2.86743   | YES | YES |
| 65  | b | 1057.43 | 25.68567  | YES | YES |
| 66  | b | 1058.74 | 20.20087  | YES | YES |
| 67  | a | 1060.03 | 0.73582   | YES | YES |
| 68  | b | 1064.58 | 14.99578  | YES | YES |
| 69  | a | 1065.14 | 11.38696  | YES | YES |
| 70  | a | 1179.87 | 0.05155   | YES | YES |
| 71  | b | 1179.89 | 0.66455   | YES | YES |
| 72  | b | 1186.63 | 4.04197   | YES | YES |
| 73  | a | 1187.25 | 4.40552   | YES | YES |
| 74  | b | 1316.56 | 53.98389  | YES | YES |
| 75  | a | 1317.71 | 1.79384   | YES | YES |
| 76  | b | 1318.76 | 11.85347  | YES | YES |
| 77  | a | 1320.93 | 2.08588   | YES | YES |
| 78  | a | 1353.18 | 1.78026   | YES | YES |
| 79  | b | 1359.22 | 23.45402  | YES | YES |
| 80  | b | 1416.98 | 5.06647   | YES | YES |
| 81  | a | 1417.51 | 17.60854  | YES | YES |
| 82  | a | 1419.15 | 4.79949   | YES | YES |
| 83  | b | 1419.93 | 26.48556  | YES | YES |
| 84  | b | 1420.68 | 6.47653   | YES | YES |
| 85  | a | 1421.49 | 0.37818   | YES | YES |
| 86  | b | 1433.58 | 21.15246  | YES | YES |
| 87  | a | 1436.79 | 3.83216   | YES | YES |
| 88  | b | 1451.18 | 1.03675   | YES | YES |
| 89  | a | 1451.63 | 0.01695   | YES | YES |
| 90  | b | 1483.95 | 1.19428   | YES | YES |
| 91  | a | 1484.03 | 0.19341   | YES | YES |
| 92  | b | 1489.34 | 44.76977  | YES | YES |
| 93  | a | 1489.41 | 4.90996   | YES | YES |
| 94  | a | 1490.15 | 5.54727   | YES | YES |
| 95  | b | 1490.61 | 4.75668   | YES | YES |
| 96  | b | 1491.95 | 0.39536   | YES | YES |
| 97  | a | 1492.17 | 2.47577   | YES | YES |
| 98  | b | 1499.91 | 5.61920   | YES | YES |
| 99  | a | 1502.04 | 46.44285  | YES | YES |
| 100 | a | 1508.09 | 6.59251   | YES | YES |
| 101 | b | 1508.38 | 79.96858  | YES | YES |
| 102 | a | 1580.36 | 5.93641   | YES | YES |
| 103 | b | 1581.31 | 59.12532  | YES | YES |
| 104 | b | 1631.88 | 59.17792  | YES | YES |
| 105 | a | 1634.69 | 160.08470 | YES | YES |
| 106 | b | 3031.01 | 1.63445   | YES | YES |
| 107 | a | 3031.12 | 4.20964   | YES | YES |
| 108 | a | 3036.75 | 2.64524   | YES | YES |
| 109 | b | 3036.75 | 1.84569   | YES | YES |
| 110 | a | 3037.40 | 0.69627   | YES | YES |
| 111 | b | 3037.40 | 3.90681   | YES | YES |
| 112 | b | 3092.26 | 13.67008  | YES | YES |
| 113 | a | 3092.35 | 4.21672   | YES | YES |
| 114 | a | 3096.00 | 0.94527   | YES | YES |
| 115 | b | 3096.14 | 6.36383   | YES | YES |
| 116 | b | 3096.27 | 8.41320   | YES | YES |
| 117 | a | 3096.40 | 1.07274   | YES | YES |
| 118 | b | 3126.46 | 4.25011   | YES | YES |
| 119 | a | 3126.48 | 0.02032   | YES | YES |
| 120 | b | 3126.62 | 2.91783   | YES | YES |
| 121 | a | 3126.66 | 12.23258  | YES | YES |
| 122 | b | 3127.03 | 7.50437   | YES | YES |
| 123 | a | 3127.04 | 6.52120   | YES | YES |
| 124 | a | 3136.91 | 0.00314   | YES | YES |
| 125 | b | 3136.93 | 0.02052   | YES | YES |



|     |   |         |         |     |     |
|-----|---|---------|---------|-----|-----|
| 126 | a | 3173.49 | 0.71269 | YES | YES |
| 127 | b | 3173.56 | 7.38202 | YES | YES |
| 128 | b | 3174.79 | 2.09088 | YES | YES |
| 129 | a | 3174.91 | 1.71867 | YES | YES |

[Au(Mes)(CO)]<sup>+</sup>

Symmetry: c1

Cartesian coordinates in Ångström:

|    |            |            |            |
|----|------------|------------|------------|
| Au | 1.9964238  | 0.6373212  | -0.8722370 |
| C  | -0.2874998 | -0.8160908 | -1.1003981 |
| C  | -0.1929572 | 0.6158102  | -1.0635041 |
| C  | -0.2722732 | -1.5424114 | -2.4122472 |
| C  | -0.4188396 | 1.3256873  | 0.1635987  |
| C  | -0.5984089 | 0.5878306  | 1.3245330  |
| C  | -0.6265583 | -0.8117987 | 1.3103614  |
| C  | -0.4707993 | -1.4923272 | 0.0969726  |
| H  | -0.3244965 | 1.1581274  | -1.9961267 |
| H  | -0.5279013 | -2.5730631 | 0.0876317  |
| C  | -0.8131265 | -1.5750192 | 2.5846263  |
| H  | -0.7537833 | 1.1087172  | 2.2604336  |
| C  | -0.5398227 | 2.8203884  | 0.1623279  |
| C  | 3.9458754  | 0.7049756  | -0.7850701 |
| O  | 5.0653367  | 0.7547659  | -0.7546965 |
| H  | -0.0604289 | 3.2711625  | -0.7045227 |
| H  | -0.1188490 | 3.2573451  | 1.0662919  |
| H  | -1.5977055 | 3.0932984  | 0.1309508  |
| H  | -1.2960160 | -2.5345372 | 2.4083885  |
| H  | -1.3998908 | -1.0094302 | 3.3063524  |
| H  | 0.1595403  | -1.7775805 | 3.0417592  |
| H  | 0.1969600  | -0.9574176 | -3.2009303 |
| H  | -1.3011049 | -1.7439247 | -2.7211660 |
| H  | 0.2363255  | -2.5018292 | -2.3333292 |

\$vibrational spectrum

| #  | mode | symmetry | wave number<br>cm**(-1) | IR intensity<br>km/mol | selection rules<br>IR | RAMAN |
|----|------|----------|-------------------------|------------------------|-----------------------|-------|
| 1  |      |          | 0.00                    | 0.00000                | -                     | -     |
| 2  |      |          | 0.00                    | 0.00000                | -                     | -     |
| 3  |      |          | 0.00                    | 0.00000                | -                     | -     |
| 4  |      |          | 0.00                    | 0.00000                | -                     | -     |
| 5  |      |          | 0.00                    | 0.00000                | -                     | -     |
| 6  |      |          | 0.00                    | 0.00000                | -                     | -     |
| 7  |      | a        | 42.52                   | 0.08255                | YES                   | YES   |
| 8  |      | a        | 51.09                   | 0.01839                | YES                   | YES   |
| 9  |      | a        | 55.71                   | 0.36284                | YES                   | YES   |
| 10 |      | a        | 69.83                   | 0.79428                | YES                   | YES   |
| 11 |      | a        | 80.21                   | 0.00087                | YES                   | YES   |
| 12 |      | a        | 104.57                  | 0.78883                | YES                   | YES   |
| 13 |      | a        | 116.88                  | 0.53265                | YES                   | YES   |
| 14 |      | a        | 141.31                  | 0.36417                | YES                   | YES   |
| 15 |      | a        | 183.56                  | 3.03609                | YES                   | YES   |
| 16 |      | a        | 205.81                  | 0.12626                | YES                   | YES   |
| 17 |      | a        | 272.01                  | 0.16250                | YES                   | YES   |
| 18 |      | a        | 278.33                  | 0.18588                | YES                   | YES   |
| 19 |      | a        | 376.50                  | 10.18507               | YES                   | YES   |
| 20 |      | a        | 379.06                  | 4.44527                | YES                   | YES   |
| 21 |      | a        | 385.77                  | 0.42864                | YES                   | YES   |
| 22 |      | a        | 398.80                  | 21.50098               | YES                   | YES   |
| 23 |      | a        | 464.38                  | 0.09148                | YES                   | YES   |
| 24 |      | a        | 507.47                  | 0.00031                | YES                   | YES   |
| 25 |      | a        | 513.15                  | 1.87500                | YES                   | YES   |
| 26 |      | a        | 549.76                  | 0.01677                | YES                   | YES   |
| 27 |      | a        | 552.98                  | 4.94079                | YES                   | YES   |
| 28 |      | a        | 579.69                  | 0.09213                | YES                   | YES   |
| 29 |      | a        | 716.40                  | 3.89533                | YES                   | YES   |
| 30 |      | a        | 883.27                  | 40.52255               | YES                   | YES   |
| 31 |      | a        | 928.56                  | 0.25575                | YES                   | YES   |
| 32 |      | a        | 934.07                  | 38.93681               | YES                   | YES   |
| 33 |      | a        | 942.39                  | 0.01867                | YES                   | YES   |
| 34 |      | a        | 944.99                  | 16.16949               | YES                   | YES   |
| 35 |      | a        | 1001.76                 | 3.16583                | YES                   | YES   |
| 36 |      | a        | 1031.07                 | 2.19748                | YES                   | YES   |
| 37 |      | a        | 1039.52                 | 5.04365                | YES                   | YES   |
| 38 |      | a        | 1044.19                 | 0.01565                | YES                   | YES   |
| 39 |      | a        | 1056.41                 | 16.65696               | YES                   | YES   |
| 40 |      | a        | 1057.59                 | 6.23749                | YES                   | YES   |
| 41 |      | a        | 1065.29                 | 15.91064               | YES                   | YES   |
| 42 |      | a        | 1177.83                 | 0.36615                | YES                   | YES   |
| 43 |      | a        | 1185.58                 | 5.36008                | YES                   | YES   |
| 44 |      | a        | 1316.76                 | 26.78441               | YES                   | YES   |

|    |   |         |           |     |     |
|----|---|---------|-----------|-----|-----|
| 45 | a | 1320.58 | 7.05928   | YES | YES |
| 46 | a | 1357.70 | 15.16219  | YES | YES |
| 47 | a | 1417.05 | 15.06108  | YES | YES |
| 48 | a | 1420.46 | 11.48130  | YES | YES |
| 49 | a | 1421.48 | 8.00636   | YES | YES |
| 50 | a | 1431.08 | 4.40034   | YES | YES |
| 51 | a | 1447.29 | 0.58851   | YES | YES |
| 52 | a | 1481.51 | 0.17684   | YES | YES |
| 53 | a | 1488.23 | 27.51233  | YES | YES |
| 54 | a | 1488.97 | 1.48210   | YES | YES |
| 55 | a | 1491.46 | 1.41425   | YES | YES |
| 56 | a | 1499.02 | 23.43571  | YES | YES |
| 57 | a | 1506.78 | 57.99469  | YES | YES |
| 58 | a | 1571.86 | 40.62627  | YES | YES |
| 59 | a | 1628.26 | 126.90015 | YES | YES |
| 60 | a | 2255.83 | 508.47170 | YES | YES |
| 61 | a | 3032.66 | 0.43023   | YES | YES |
| 62 | a | 3037.59 | 0.03111   | YES | YES |
| 63 | a | 3037.61 | 0.63172   | YES | YES |
| 64 | a | 3095.70 | 5.82272   | YES | YES |
| 65 | a | 3098.06 | 3.58493   | YES | YES |
| 66 | a | 3098.28 | 3.05566   | YES | YES |
| 67 | a | 3126.66 | 3.18740   | YES | YES |
| 68 | a | 3129.94 | 0.84499   | YES | YES |
| 69 | a | 3130.25 | 5.81627   | YES | YES |
| 70 | a | 3131.70 | 3.62004   | YES | YES |
| 71 | a | 3179.19 | 1.41852   | YES | YES |
| 72 | a | 3180.37 | 0.63080   | YES | YES |

Mes

Symmetry: c3

Cartesian coordinates in Ångström:

|   |          |          |          |
|---|----------|----------|----------|
| C | -0.35733 | 1.33627  | 0.01041  |
| C | -1.35418 | 0.36822  | 0.00934  |
| C | 0.99598  | 0.98864  | 0.00934  |
| C | 1.33591  | -0.35868 | 0.01041  |
| C | 0.35820  | -1.35686 | 0.00934  |
| C | -0.97858 | -0.97760 | 0.01041  |
| C | -2.81002 | 0.75173  | -0.00385 |
| H | -1.74706 | -1.74222 | 0.01816  |
| H | 2.38233  | -0.64189 | 0.01816  |
| C | 0.75399  | -2.80941 | -0.00385 |
| H | -0.63527 | 2.38411  | 0.01816  |
| C | 2.05603  | 2.05768  | -0.00385 |
| H | 2.09823  | 2.55569  | -0.97566 |
| H | 3.04238  | 1.64129  | 0.19817  |
| H | 1.85269  | 2.82652  | 0.74343  |
| H | 1.52150  | -3.01774 | 0.74343  |
| H | 1.16417  | -3.09496 | -0.97566 |
| H | -0.09979 | -3.45543 | 0.19817  |
| H | -2.94259 | 1.81414  | 0.19817  |
| H | -3.37419 | 0.19122  | 0.74343  |
| H | -3.26240 | 0.53928  | -0.97566 |

\$vibrational spectrum

| #  | mode | symmetry | wave number<br>cm**(-1) | IR intensity<br>km/mol | selection rules<br>IR | RAMAN |
|----|------|----------|-------------------------|------------------------|-----------------------|-------|
| 1  |      |          | -0.00                   | 0.00000                | -                     | -     |
| 2  |      |          | -0.00                   | 0.00000                | -                     | -     |
| 3  |      |          | 0.00                    | 0.00000                | -                     | -     |
| 4  |      |          | 0.00                    | 0.00000                | -                     | -     |
| 5  |      |          | 0.00                    | 0.00000                | -                     | -     |
| 6  |      |          | 0.00                    | 0.00000                | -                     | -     |
| 7  |      | a        | 19.81                   | 0.29056                | YES                   | YES   |
| 8  |      | e        | 33.32                   | 0.07823                | YES                   | YES   |
| 9  |      | e        | 33.32                   | 0.07823                | YES                   | YES   |
| 10 |      | a        | 172.95                  | 5.37880                | YES                   | YES   |
| 11 |      | e        | 222.57                  | 0.00648                | YES                   | YES   |
| 12 |      | e        | 222.57                  | 0.00648                | YES                   | YES   |
| 13 |      | e        | 272.38                  | 0.48467                | YES                   | YES   |
| 14 |      | e        | 272.38                  | 0.48467                | YES                   | YES   |
| 15 |      | a        | 463.76                  | 0.00013                | YES                   | YES   |
| 16 |      | e        | 522.83                  | 0.41800                | YES                   | YES   |
| 17 |      | e        | 522.83                  | 0.41800                | YES                   | YES   |
| 18 |      | e        | 534.02                  | 0.21570                | YES                   | YES   |
| 19 |      | e        | 534.02                  | 0.21570                | YES                   | YES   |
| 20 |      | a        | 580.91                  | 0.00117                | YES                   | YES   |
| 21 |      | a        | 712.03                  | 12.51074               | YES                   | YES   |
| 22 |      | a        | 861.66                  | 23.34008               | YES                   | YES   |
| 23 |      | e        | 902.16                  | 0.02286                | YES                   | YES   |

|    |   |         |          |     |     |
|----|---|---------|----------|-----|-----|
| 24 | e | 902.16  | 0.02286  | YES | YES |
| 25 | e | 948.87  | 2.34661  | YES | YES |
| 26 | e | 948.87  | 2.34661  | YES | YES |
| 27 | a | 1017.81 | 0.08937  | YES | YES |
| 28 | e | 1034.50 | 2.82421  | YES | YES |
| 29 | e | 1034.50 | 2.82421  | YES | YES |
| 30 | a | 1040.02 | 0.02059  | YES | YES |
| 31 | e | 1064.44 | 2.00890  | YES | YES |
| 32 | e | 1064.44 | 2.00890  | YES | YES |
| 33 | a | 1066.02 | 6.88396  | YES | YES |
| 34 | e | 1190.11 | 0.19043  | YES | YES |
| 35 | e | 1190.11 | 0.19043  | YES | YES |
| 36 | a | 1302.94 | 0.03947  | YES | YES |
| 37 | a | 1326.28 | 0.09192  | YES | YES |
| 38 | a | 1348.21 | 0.03679  | YES | YES |
| 39 | e | 1413.64 | 1.21082  | YES | YES |
| 40 | e | 1413.64 | 1.21082  | YES | YES |
| 41 | a | 1417.16 | 0.07464  | YES | YES |
| 42 | e | 1460.62 | 0.56194  | YES | YES |
| 43 | e | 1460.62 | 0.56194  | YES | YES |
| 44 | a | 1487.22 | 15.97275 | YES | YES |
| 45 | e | 1488.20 | 0.02720  | YES | YES |
| 46 | e | 1488.20 | 0.02720  | YES | YES |
| 47 | a | 1494.95 | 1.51599  | YES | YES |
| 48 | e | 1515.08 | 21.06179 | YES | YES |
| 49 | e | 1515.08 | 21.06179 | YES | YES |
| 50 | e | 1644.85 | 27.88868 | YES | YES |
| 51 | e | 1644.85 | 27.88868 | YES | YES |
| 52 | e | 3024.77 | 46.82572 | YES | YES |
| 53 | e | 3024.77 | 46.82572 | YES | YES |
| 54 | a | 3025.39 | 1.89106  | YES | YES |
| 55 | e | 3073.51 | 2.13337  | YES | YES |
| 56 | e | 3073.51 | 2.13337  | YES | YES |
| 57 | a | 3073.67 | 47.85160 | YES | YES |
| 58 | a | 3102.84 | 0.01737  | YES | YES |
| 59 | e | 3103.12 | 24.33670 | YES | YES |
| 60 | e | 3103.12 | 24.33670 | YES | YES |
| 61 | e | 3149.86 | 26.92904 | YES | YES |
| 62 | e | 3149.86 | 26.92904 | YES | YES |
| 63 | a | 3152.71 | 0.01344  | YES | YES |

[Mes]<sup>+</sup>

Symmetry: c1

Cartesian coordinates in Ångström:

|   |            |            |            |
|---|------------|------------|------------|
| C | -0.3488824 | 1.3004297  | -0.0466429 |
| C | -1.3938633 | 0.3081259  | 0.0030968  |
| C | 1.0260796  | 0.9740758  | -0.0498712 |
| C | 1.3453229  | -0.3596444 | -0.0023749 |
| C | 0.3308288  | -1.3800078 | 0.0486926  |
| C | -1.0279729 | -1.0152012 | 0.0498165  |
| C | -2.8098901 | 0.7600707  | 0.0017988  |
| H | -1.7823122 | -1.7886290 | 0.0878462  |
| H | 2.3819110  | -0.6712089 | -0.0026615 |
| C | 0.7493554  | -2.7955260 | 0.0998950  |
| H | -0.6405371 | 2.3438646  | -0.0834495 |
| C | 2.0574146  | 2.0585352  | -0.1025157 |
| H | 1.9239240  | 2.6737614  | -0.9941855 |
| H | 3.0650351  | 1.6502614  | -0.1148414 |
| H | 1.9645870  | 2.7192403  | 0.7615461  |
| H | 1.3873672  | -2.9641581 | 0.9757494  |
| H | 1.3839098  | -3.0296993 | -0.7629716 |
| H | -0.0895160 | -3.4844431 | 0.1284054  |
| H | -2.9996860 | 1.4164824  | 0.8565897  |
| H | -3.5056974 | -0.0736492 | 0.0373611  |
| H | -3.0173782 | 1.3573198  | -0.8912834 |

\$vibrational spectrum

| # | mode | symmetry | wave number<br>cm <sup>**</sup> (-1) | IR intensity<br>km/mol | selection rules<br>IR | RAMAN |
|---|------|----------|--------------------------------------|------------------------|-----------------------|-------|
|   | 1    |          | -0.00                                | 0.00000                | -                     | -     |
|   | 2    |          | 0.00                                 | 0.00000                | -                     | -     |
|   | 3    |          | 0.00                                 | 0.00000                | -                     | -     |
|   | 4    |          | 0.00                                 | 0.00000                | -                     | -     |
|   | 5    |          | 0.00                                 | 0.00000                | -                     | -     |
|   | 6    |          | 0.00                                 | 0.00000                | -                     | -     |
|   | 7    | a        | 78.96                                | 2.40811                | YES                   | YES   |
|   | 8    | a        | 89.11                                | 0.51692                | YES                   | YES   |
|   | 9    | a        | 117.57                               | 1.21508                | YES                   | YES   |
|   | 10   | a        | 154.49                               | 0.61243                | YES                   | YES   |
|   | 11   | a        | 176.13                               | 0.00245                | YES                   | YES   |

|    |   |         |           |     |     |
|----|---|---------|-----------|-----|-----|
| 12 | a | 203.76  | 0.14167   | YES | YES |
| 13 | a | 250.77  | 15.23399  | YES | YES |
| 14 | a | 269.74  | 0.92723   | YES | YES |
| 15 | a | 312.37  | 23.89026  | YES | YES |
| 16 | a | 452.31  | 6.79659   | YES | YES |
| 17 | a | 465.73  | 0.12321   | YES | YES |
| 18 | a | 498.35  | 0.68002   | YES | YES |
| 19 | a | 510.72  | 0.08598   | YES | YES |
| 20 | a | 574.32  | 0.05736   | YES | YES |
| 21 | a | 595.76  | 8.47012   | YES | YES |
| 22 | a | 850.42  | 8.05917   | YES | YES |
| 23 | a | 892.70  | 0.02954   | YES | YES |
| 24 | a | 904.23  | 34.08899  | YES | YES |
| 25 | a | 931.32  | 0.79716   | YES | YES |
| 26 | a | 933.94  | 5.94325   | YES | YES |
| 27 | a | 958.01  | 36.13171  | YES | YES |
| 28 | a | 994.98  | 3.58954   | YES | YES |
| 29 | a | 1021.03 | 11.01630  | YES | YES |
| 30 | a | 1030.87 | 31.27297  | YES | YES |
| 31 | a | 1048.12 | 3.85174   | YES | YES |
| 32 | a | 1050.72 | 1.86565   | YES | YES |
| 33 | a | 1071.33 | 5.50165   | YES | YES |
| 34 | a | 1171.09 | 73.50053  | YES | YES |
| 35 | a | 1179.14 | 17.32840  | YES | YES |
| 36 | a | 1254.42 | 100.41560 | YES | YES |
| 37 | a | 1331.86 | 14.14331  | YES | YES |
| 38 | a | 1336.21 | 2.07649   | YES | YES |
| 39 | a | 1372.34 | 93.14190  | YES | YES |
| 40 | a | 1390.59 | 35.26349  | YES | YES |
| 41 | a | 1404.55 | 10.15594  | YES | YES |
| 42 | a | 1422.89 | 22.42188  | YES | YES |
| 43 | a | 1428.72 | 71.68363  | YES | YES |
| 44 | a | 1442.25 | 13.22487  | YES | YES |
| 45 | a | 1458.30 | 11.34749  | YES | YES |
| 46 | a | 1470.45 | 29.32805  | YES | YES |
| 47 | a | 1477.75 | 12.35096  | YES | YES |
| 48 | a | 1481.22 | 29.26582  | YES | YES |
| 49 | a | 1496.26 | 66.31373  | YES | YES |
| 50 | a | 1554.39 | 121.24591 | YES | YES |
| 51 | a | 1643.47 | 50.63341  | YES | YES |
| 52 | a | 2999.12 | 63.76367  | YES | YES |
| 53 | a | 3015.79 | 19.58910  | YES | YES |
| 54 | a | 3032.92 | 1.46680   | YES | YES |
| 55 | a | 3038.46 | 0.77289   | YES | YES |
| 56 | a | 3059.13 | 0.00514   | YES | YES |
| 57 | a | 3091.59 | 0.71836   | YES | YES |
| 58 | a | 3135.83 | 5.14081   | YES | YES |
| 59 | a | 3142.93 | 7.88435   | YES | YES |
| 60 | a | 3149.29 | 10.54449  | YES | YES |
| 61 | a | 3173.26 | 0.07768   | YES | YES |
| 62 | a | 3186.53 | 0.02012   | YES | YES |
| 63 | a | 3198.33 | 0.07038   | YES | YES |

[Au(C<sub>6</sub>H<sub>6</sub>)<sub>2</sub>]<sup>+</sup>

Symmetry: c2

Cartesian coordinates in Ångström:

|    |            |            |            |
|----|------------|------------|------------|
| C  | 2.4554167  | 2.5216722  | -0.7542212 |
| C  | 2.3298853  | 1.3109409  | -1.4043256 |
| H  | 2.5705402  | 3.4302648  | -1.3285172 |
| C  | 2.2095960  | 0.1180192  | -0.6552057 |
| C  | 2.2054968  | 0.1832646  | 0.7644371  |
| C  | 2.3215092  | 1.4355905  | 1.4030116  |
| C  | 2.4530296  | 2.5833461  | 0.6472303  |
| Au | 0.0000000  | -0.0000000 | -0.0113113 |
| H  | 2.3560880  | 1.2586699  | -2.4833893 |
| H  | 2.5671536  | 3.5393740  | 1.1389480  |
| H  | 2.3396734  | 1.4814518  | 2.4825173  |
| H  | 2.2826780  | -0.7258265 | 1.3460979  |
| H  | 2.3131592  | -0.8386334 | -1.1509277 |
| C  | -2.4554167 | -2.5216722 | -0.7542212 |
| C  | -2.3298853 | -1.3109409 | -1.4043256 |
| H  | -2.5705402 | -3.4302648 | -1.3285172 |
| C  | -2.2095960 | -0.1180192 | -0.6552057 |
| C  | -2.2054968 | -0.1832646 | 0.7644371  |
| C  | -2.3215092 | -1.4355905 | 1.4030116  |
| C  | -2.4530296 | -2.5833461 | 0.6472303  |
| H  | -2.3560880 | -1.2586699 | -2.4833893 |
| H  | -2.5671536 | -3.5393740 | 1.1389480  |
| H  | -2.3396734 | -1.4814518 | 2.4825173  |
| H  | -2.2826780 | 0.7258265  | 1.3460979  |

H -2.3131592 0.8386334 -1.1509277

\$vibrational spectrum

| #  | mode | symmetry | wave number<br>cm**(-1) | IR intensity<br>km/mol | IR  | selection rules<br>RAMAN |
|----|------|----------|-------------------------|------------------------|-----|--------------------------|
| 1  |      |          | -0.00                   | 0.00000                | -   | -                        |
| 2  |      |          | -0.00                   | 0.00000                | -   | -                        |
| 3  |      |          | -0.00                   | 0.00000                | -   | -                        |
| 4  |      |          | 0.00                    | 0.00000                | -   | -                        |
| 5  |      |          | 0.00                    | 0.00000                | -   | -                        |
| 6  |      |          | 0.00                    | 0.00000                | -   | -                        |
| 7  |      | a        | 10.82                   | 0.07887                | YES | YES                      |
| 8  |      | a        | 17.48                   | 1.57773                | YES | YES                      |
| 9  |      | b        | 42.88                   | 1.03037                | YES | YES                      |
| 10 |      | b        | 72.35                   | 0.15819                | YES | YES                      |
| 11 |      | a        | 81.52                   | 0.00998                | YES | YES                      |
| 12 |      | a        | 87.21                   | 0.00002                | YES | YES                      |
| 13 |      | b        | 121.14                  | 1.34069                | YES | YES                      |
| 14 |      | b        | 243.03                  | 0.30820                | YES | YES                      |
| 15 |      | a        | 247.66                  | 0.00006                | YES | YES                      |
| 16 |      | b        | 418.30                  | 0.14515                | YES | YES                      |
| 17 |      | a        | 420.19                  | 0.29760                | YES | YES                      |
| 18 |      | b        | 425.55                  | 0.10634                | YES | YES                      |
| 19 |      | a        | 430.51                  | 0.02510                | YES | YES                      |
| 20 |      | a        | 611.81                  | 0.37962                | YES | YES                      |
| 21 |      | b        | 613.35                  | 0.01714                | YES | YES                      |
| 22 |      | a        | 615.70                  | 0.00146                | YES | YES                      |
| 23 |      | b        | 615.78                  | 2.43261                | YES | YES                      |
| 24 |      | a        | 699.55                  | 1.08531                | YES | YES                      |
| 25 |      | b        | 700.89                  | 0.93424                | YES | YES                      |
| 26 |      | b        | 739.67                  | 185.78512              | YES | YES                      |
| 27 |      | a        | 740.73                  | 0.00149                | YES | YES                      |
| 28 |      | b        | 880.63                  | 0.11501                | YES | YES                      |
| 29 |      | a        | 883.52                  | 0.04074                | YES | YES                      |
| 30 |      | b        | 918.69                  | 3.31265                | YES | YES                      |
| 31 |      | a        | 923.87                  | 0.00611                | YES | YES                      |
| 32 |      | b        | 980.26                  | 16.72997               | YES | YES                      |
| 33 |      | a        | 983.96                  | 0.09808                | YES | YES                      |
| 34 |      | b        | 986.28                  | 0.06431                | YES | YES                      |
| 35 |      | a        | 994.16                  | 3.92630                | YES | YES                      |
| 36 |      | b        | 1014.78                 | 0.80031                | YES | YES                      |
| 37 |      | a        | 1015.20                 | 0.00795                | YES | YES                      |
| 38 |      | a        | 1032.31                 | 2.32694                | YES | YES                      |
| 39 |      | b        | 1033.10                 | 0.20157                | YES | YES                      |
| 40 |      | b        | 1042.58                 | 5.12174                | YES | YES                      |
| 41 |      | a        | 1043.16                 | 0.01933                | YES | YES                      |
| 42 |      | a        | 1045.16                 | 0.31112                | YES | YES                      |
| 43 |      | b        | 1045.35                 | 0.03035                | YES | YES                      |
| 44 |      | a        | 1058.89                 | 0.59961                | YES | YES                      |
| 45 |      | b        | 1059.84                 | 0.00150                | YES | YES                      |
| 46 |      | a        | 1180.74                 | 0.00146                | YES | YES                      |
| 47 |      | b        | 1180.99                 | 3.83880                | YES | YES                      |
| 48 |      | b        | 1201.80                 | 0.72881                | YES | YES                      |
| 49 |      | a        | 1202.96                 | 0.02476                | YES | YES                      |
| 50 |      | a        | 1204.52                 | 0.58746                | YES | YES                      |
| 51 |      | b        | 1204.76                 | 0.08343                | YES | YES                      |
| 52 |      | b        | 1353.01                 | 50.69624               | YES | YES                      |
| 53 |      | a        | 1357.94                 | 0.19286                | YES | YES                      |
| 54 |      | a        | 1387.61                 | 0.32148                | YES | YES                      |
| 55 |      | b        | 1387.67                 | 0.00017                | YES | YES                      |
| 56 |      | b        | 1497.71                 | 0.17123                | YES | YES                      |
| 57 |      | a        | 1497.92                 | 32.22095               | YES | YES                      |
| 58 |      | b        | 1500.43                 | 27.96802               | YES | YES                      |
| 59 |      | a        | 1502.77                 | 0.16014                | YES | YES                      |
| 60 |      | b        | 1591.68                 | 6.88075                | YES | YES                      |
| 61 |      | a        | 1594.21                 | 0.00326                | YES | YES                      |
| 62 |      | a        | 1623.42                 | 7.66740                | YES | YES                      |
| 63 |      | b        | 1623.76                 | 0.67815                | YES | YES                      |
| 64 |      | a        | 3174.48                 | 1.30957                | YES | YES                      |
| 65 |      | b        | 3175.03                 | 0.17290                | YES | YES                      |
| 66 |      | b        | 3185.94                 | 1.60276                | YES | YES                      |
| 67 |      | a        | 3186.38                 | 0.03230                | YES | YES                      |
| 68 |      | a        | 3190.63                 | 0.81424                | YES | YES                      |
| 69 |      | b        | 3190.64                 | 0.01186                | YES | YES                      |
| 70 |      | b        | 3199.33                 | 0.01902                | YES | YES                      |
| 71 |      | a        | 3199.44                 | 0.00002                | YES | YES                      |
| 72 |      | a        | 3207.04                 | 0.01647                | YES | YES                      |
| 73 |      | b        | 3207.05                 | 0.00286                | YES | YES                      |
| 74 |      | b        | 3211.74                 | 0.61368                | YES | YES                      |
| 75 |      | a        | 3211.75                 | 0.00020                | YES | YES                      |

[Au(C<sub>6</sub>H<sub>6</sub>)(CO)]<sup>+</sup>

Symmetry: cs

Cartesian coordinates in Ångström:

|    |            |            |            |
|----|------------|------------|------------|
| Au | 1.6248796  | 0.9752988  | 0.0000000  |
| C  | -0.8861318 | -0.9362261 | -1.2133500 |
| C  | -0.6967617 | 0.4404167  | -1.2268573 |
| H  | -0.9748632 | -1.4755500 | -2.1455883 |
| C  | -0.5910721 | 1.1528656  | 0.0000000  |
| C  | -0.6967617 | 0.4404167  | 1.2268573  |
| C  | -0.8861318 | -0.9362261 | 1.2133500  |
| C  | -0.9939581 | -1.6133231 | 0.0000000  |
| H  | -0.6732179 | 0.9835547  | -2.1614538 |
| H  | -1.1666666 | -2.6808427 | 0.0000000  |
| H  | -0.9748632 | -1.4755500 | 2.1455883  |
| H  | -0.6732179 | 0.9835547  | 2.1614538  |
| H  | -0.6888007 | 2.2337771  | 0.0000000  |
| C  | 3.5785146  | 0.9509576  | 0.0000000  |
| O  | 4.6984203  | 0.9570350  | 0.0000000  |

\$vibrational spectrum

| #  | mode | symmetry | wave number<br>cm**(-1) | IR intensity<br>km/mol | selection rules |       |
|----|------|----------|-------------------------|------------------------|-----------------|-------|
| #  |      |          |                         |                        | IR              | RAMAN |
| 1  |      |          | -0.00                   | 0.00000                | -               | -     |
| 2  |      |          | -0.00                   | 0.00000                | -               | -     |
| 3  |      |          | 0.00                    | 0.00000                | -               | -     |
| 4  |      |          | 0.00                    | 0.00000                | -               | -     |
| 5  |      |          | 0.00                    | 0.00000                | -               | -     |
| 6  |      |          | 0.00                    | 0.00000                | -               | -     |
| 7  |      | a'       | 54.32                   | 0.30287                | YES             | YES   |
| 8  |      | a''      | 62.42                   | 0.56156                | YES             | YES   |
| 9  |      | a''      | 74.74                   | 0.04311                | YES             | YES   |
| 10 |      | a'       | 85.33                   | 0.84140                | YES             | YES   |
| 11 |      | a'       | 266.10                  | 0.64975                | YES             | YES   |
| 12 |      | a'       | 370.50                  | 7.58624                | YES             | YES   |
| 13 |      | a''      | 374.00                  | 4.92248                | YES             | YES   |
| 14 |      | a'       | 392.95                  | 14.57594               | YES             | YES   |
| 15 |      | a''      | 408.78                  | 0.01104                | YES             | YES   |
| 16 |      | a'       | 451.37                  | 4.18934                | YES             | YES   |
| 17 |      | a''      | 613.66                  | 0.17607                | YES             | YES   |
| 18 |      | a'       | 615.61                  | 0.75109                | YES             | YES   |
| 19 |      | a'       | 698.65                  | 20.40698               | YES             | YES   |
| 20 |      | a'       | 748.22                  | 83.30846               | YES             | YES   |
| 21 |      | a''      | 887.68                  | 0.03217                | YES             | YES   |
| 22 |      | a'       | 932.93                  | 18.40690               | YES             | YES   |
| 23 |      | a'       | 978.97                  | 24.36198               | YES             | YES   |
| 24 |      | a'       | 1005.47                 | 1.08550                | YES             | YES   |
| 25 |      | a''      | 1022.17                 | 0.31905                | YES             | YES   |
| 26 |      | a'       | 1036.70                 | 5.50669                | YES             | YES   |
| 27 |      | a'       | 1046.19                 | 0.01321                | YES             | YES   |
| 28 |      | a''      | 1050.80                 | 1.58076                | YES             | YES   |
| 29 |      | a'       | 1055.86                 | 0.51605                | YES             | YES   |
| 30 |      | a''      | 1180.73                 | 0.16864                | YES             | YES   |
| 31 |      | a''      | 1204.63                 | 0.78729                | YES             | YES   |
| 32 |      | a'       | 1205.53                 | 0.78829                | YES             | YES   |
| 33 |      | a''      | 1355.90                 | 6.94906                | YES             | YES   |
| 34 |      | a''      | 1386.90                 | 0.22842                | YES             | YES   |
| 35 |      | a''      | 1500.48                 | 26.93093               | YES             | YES   |
| 36 |      | a'       | 1501.11                 | 15.33322               | YES             | YES   |
| 37 |      | a''      | 1594.91                 | 0.92895                | YES             | YES   |
| 38 |      | a'       | 1612.35                 | 16.96574               | YES             | YES   |
| 39 |      | a'       | 2265.13                 | 476.77056              | YES             | YES   |
| 40 |      | a'       | 3148.44                 | 4.99749                | YES             | YES   |
| 41 |      | a'       | 3191.44                 | 0.57086                | YES             | YES   |
| 42 |      | a''      | 3194.90                 | 1.26887                | YES             | YES   |
| 43 |      | a'       | 3199.23                 | 0.97134                | YES             | YES   |
| 44 |      | a''      | 3208.70                 | 1.40657                | YES             | YES   |
| 45 |      | a'       | 3213.27                 | 0.04202                | YES             | YES   |

\$raman spectrum

| # | mode | symmetry | wave number | selection rule | derivative of isotropic polarizability | derivative of polarizability anisotropy | raman scattering cross sections |
|---|------|----------|-------------|----------------|----------------------------------------|-----------------------------------------|---------------------------------|
| # |      |          | cm**(-1)    |                | a.u.                                   | a.u.                                    | bohr**2/sr                      |
| # |      |          |             |                |                                        |                                         | T,T II,II                       |
| 1 |      |          | 0.00        | -              | 0.000000                               | 0.000000                                | 0.00000D+00 0.00000D+00         |
| 2 |      |          | 0.00        | -              | 0.000000                               | 0.000000                                | 0.00000D+00 0.00000D+00         |
| 3 |      |          | 0.00        | -              | 0.000000                               | 0.000000                                | 0.00000D+00 0.00000D+00         |
| 4 |      |          | 0.00        | -              | 0.000000                               | 0.000000                                | 0.00000D+00 0.00000D+00         |
| 5 |      |          | 0.00        | -              | 0.000000                               | 0.000000                                | 0.00000D+00 0.00000D+00         |
| 6 |      |          | 0.00        | -              | 0.000000                               | 0.000000                                | 0.00000D+00 0.00000D+00         |
| 7 |      | a'       | 54.32       | YES            | -0.006007                              | 0.062203                                | 0.31021D-13 0.21056D-13         |

|    |     |         |     |           |          |             |             |
|----|-----|---------|-----|-----------|----------|-------------|-------------|
| 8  | a'' | 62.42   | YES | 0.000000  | 0.020466 | 0.23366D-14 | 0.17525D-14 |
| 9  | a'' | 74.74   | YES | 0.000000  | 0.082751 | 0.27261D-13 | 0.20446D-13 |
| 10 | a'  | 85.33   | YES | -0.007120 | 0.031010 | 0.47703D-14 | 0.22458D-14 |
| 11 | a'  | 266.10  | YES | -0.003620 | 0.071567 | 0.22708D-14 | 0.16554D-14 |
| 12 | a'  | 370.50  | YES | -0.008993 | 0.028261 | 0.43858D-15 | 0.15377D-15 |
| 13 | a'' | 374.00  | YES | 0.000000  | 0.012299 | 0.38275D-16 | 0.28706D-16 |
| 14 | a'  | 392.95  | YES | 0.022312  | 0.042142 | 0.17319D-14 | 0.31274D-15 |
| 15 | a'' | 408.78  | YES | 0.000000  | 0.013635 | 0.41132D-16 | 0.30849D-16 |
| 16 | a'  | 451.37  | YES | 0.011759  | 0.030042 | 0.46915D-15 | 0.12920D-15 |
| 17 | a'' | 613.66  | YES | 0.000000  | 0.060614 | 0.44829D-15 | 0.33622D-15 |
| 18 | a'  | 615.61  | YES | -0.003142 | 0.057529 | 0.41546D-15 | 0.30148D-15 |
| 19 | a'  | 698.65  | YES | 0.000416  | 0.037121 | 0.13968D-15 | 0.10462D-15 |
| 20 | a'  | 748.22  | YES | 0.004099  | 0.033538 | 0.12046D-15 | 0.77348D-16 |
| 21 | a'' | 887.68  | YES | 0.000000  | 0.000193 | 0.26579D-20 | 0.19934D-20 |
| 22 | a'  | 932.93  | YES | -0.015087 | 0.041938 | 0.28667D-15 | 0.87544D-16 |
| 23 | a'  | 978.97  | YES | 0.088260  | 0.048041 | 0.55532D-14 | 0.10687D-15 |
| 24 | a'  | 1005.47 | YES | 0.059159  | 0.040597 | 0.24324D-14 | 0.73299D-16 |
| 25 | a'' | 1022.17 | YES | 0.000000  | 0.002747 | 0.43648D-18 | 0.32736D-18 |
| 26 | a'  | 1036.70 | YES | -0.009062 | 0.019391 | 0.73572D-16 | 0.15961D-16 |
| 27 | a'  | 1046.19 | YES | 0.033885  | 0.036284 | 0.79442D-15 | 0.55111D-16 |
| 28 | a'' | 1050.80 | YES | 0.000000  | 0.020226 | 0.22679D-16 | 0.17010D-16 |
| 29 | a'  | 1055.86 | YES | -0.020921 | 0.013926 | 0.28163D-15 | 0.80046D-17 |
| 30 | a'' | 1180.73 | YES | 0.000000  | 0.048320 | 0.10787D-15 | 0.80902D-16 |
| 31 | a'' | 1204.63 | YES | 0.000000  | 0.047700 | 0.10180D-15 | 0.76352D-16 |
| 32 | a'  | 1205.53 | YES | -0.009683 | 0.066958 | 0.24749D-15 | 0.15027D-15 |
| 33 | a'' | 1355.90 | YES | 0.000000  | 0.018011 | 0.11950D-16 | 0.89627D-17 |
| 34 | a'' | 1386.90 | YES | 0.000000  | 0.013805 | 0.67574D-17 | 0.50680D-17 |
| 35 | a'' | 1500.48 | YES | 0.000000  | 0.046677 | 0.67405D-16 | 0.50554D-16 |
| 36 | a'  | 1501.11 | YES | 0.014515  | 0.043564 | 0.13194D-15 | 0.44003D-16 |
| 37 | a'' | 1594.91 | YES | 0.000000  | 0.094653 | 0.24845D-15 | 0.18634D-15 |
| 38 | a'  | 1612.35 | YES | -0.011350 | 0.113274 | 0.38821D-15 | 0.26161D-15 |
| 39 | a'  | 2265.13 | YES | -0.112297 | 0.351384 | 0.36159D-14 | 0.12620D-14 |
| 40 | a'  | 3148.44 | YES | 0.056748  | 0.204126 | 0.45007D-15 | 0.18056D-15 |
| 41 | a'  | 3191.44 | YES | -0.045183 | 0.147898 | 0.24863D-15 | 0.90964D-16 |
| 42 | a'' | 3194.90 | YES | 0.000000  | 0.282433 | 0.44083D-15 | 0.33063D-15 |
| 43 | a'  | 3199.23 | YES | -0.036156 | 0.258181 | 0.44779D-15 | 0.27514D-15 |
| 44 | a'' | 3208.70 | YES | 0.000000  | 0.180596 | 0.17788D-15 | 0.13341D-15 |
| 45 | a'  | 3213.27 | YES | 0.190271  | 0.241545 | 0.25284D-14 | 0.23761D-15 |

C<sub>6</sub>H<sub>6</sub>

Symmetry: d6h

Cartesian coordinates in Ångström:

|   |            |            |           |
|---|------------|------------|-----------|
| H | 2.1415748  | 1.2364388  | 0.0000000 |
| H | 2.1415748  | -1.2364388 | 0.0000000 |
| H | 0.0000000  | -2.4728776 | 0.0000000 |
| C | 1.2045212  | -0.6954306 | 0.0000000 |
| C | -0.0000000 | -1.3908612 | 0.0000000 |
| C | -1.2045212 | -0.6954306 | 0.0000000 |
| H | -2.1415748 | -1.2364388 | 0.0000000 |
| C | -1.2045212 | 0.6954306  | 0.0000000 |
| C | -0.0000000 | 1.3908612  | 0.0000000 |
| C | 1.2045212  | 0.6954306  | 0.0000000 |
| H | 0.0000000  | 2.4728776  | 0.0000000 |
| H | -2.1415748 | 1.2364388  | 0.0000000 |

\$vibrational spectrum

| #  | mode | symmetry | wave number<br>cm**(-1) | IR intensity<br>km/mol | selection rules<br>IR | RAMAN |
|----|------|----------|-------------------------|------------------------|-----------------------|-------|
| 1  |      |          | -0.00                   | 0.00000                | -                     | -     |
| 2  |      |          | -0.00                   | 0.00000                | -                     | -     |
| 3  |      |          | -0.00                   | 0.00000                | -                     | -     |
| 4  |      |          | -0.00                   | 0.00000                | -                     | -     |
| 5  |      |          | 0.00                    | 0.00000                | -                     | -     |
| 6  |      |          | 0.00                    | 0.00000                | -                     | -     |
| 7  |      | e2u      | 412.73                  | 0.00000                | NO                    | NO    |
| 8  |      | e2u      | 412.73                  | 0.00000                | NO                    | NO    |
| 9  |      | e2g      | 624.82                  | 0.00000                | NO                    | YES   |
| 10 |      | e2g      | 624.82                  | 0.00000                | NO                    | YES   |
| 11 |      | a2u      | 689.35                  | 110.95090              | YES                   | NO    |
| 12 |      | b1g      | 725.05                  | 0.00000                | NO                    | NO    |
| 13 |      | e1g      | 866.29                  | 0.00000                | NO                    | YES   |
| 14 |      | e1g      | 866.29                  | 0.00000                | NO                    | YES   |
| 15 |      | e2u      | 988.44                  | 0.00000                | NO                    | NO    |
| 16 |      | e2u      | 988.44                  | 0.00000                | NO                    | NO    |
| 17 |      | a1g      | 1017.81                 | 0.00000                | NO                    | YES   |
| 18 |      | b1g      | 1019.70                 | 0.00000                | NO                    | NO    |
| 19 |      | b2u      | 1029.77                 | 0.00000                | NO                    | NO    |
| 20 |      | e1u      | 1061.83                 | 5.10307                | YES                   | NO    |
| 21 |      | e1u      | 1061.83                 | 5.10307                | YES                   | NO    |
| 22 |      | b1u      | 1176.21                 | 0.00000                | NO                    | NO    |

|    |     |         |          |     |     |
|----|-----|---------|----------|-----|-----|
| 23 | e2g | 1199.63 | 0.00000  | NO  | YES |
| 24 | e2g | 1199.63 | 0.00000  | NO  | YES |
| 25 | b1u | 1336.99 | 0.00000  | NO  | NO  |
| 26 | a2g | 1387.06 | 0.00000  | NO  | NO  |
| 27 | e1u | 1518.27 | 7.44664  | YES | NO  |
| 28 | e1u | 1518.27 | 7.44664  | YES | NO  |
| 29 | e2g | 1636.74 | 0.00000  | NO  | YES |
| 30 | e2g | 1636.74 | 0.00000  | NO  | YES |
| 31 | b2u | 3161.01 | 0.00000  | NO  | NO  |
| 32 | e2g | 3170.68 | 0.00000  | NO  | YES |
| 33 | e2g | 3170.68 | 0.00000  | NO  | YES |
| 34 | e1u | 3186.10 | 36.34559 | YES | NO  |
| 35 | e1u | 3186.10 | 36.34559 | YES | NO  |
| 36 | a1g | 3195.98 | 0.00000  | NO  | YES |

[C<sub>6</sub>H<sub>6</sub>]<sup>+</sup>

Symmetry: c1

Cartesian coordinates in Ångström:

|   |            |            |            |
|---|------------|------------|------------|
| H | 2.1638118  | 1.2548143  | 0.0000615  |
| H | 2.1314898  | -1.2299778 | 0.0000833  |
| H | -0.0055775 | -2.4967428 | -0.0001611 |
| C | 1.1953779  | -0.6858719 | -0.0000018 |
| C | -0.0328818 | -1.4162565 | -0.0000614 |
| C | -1.2160855 | -0.7356267 | 0.0000684  |
| H | -2.1638118 | -1.2548141 | 0.0001074  |
| C | -1.1953778 | 0.6858718  | 0.0000300  |
| C | 0.0328819  | 1.4162565  | -0.0000336 |
| C | 1.2160856  | 0.7356267  | 0.0000140  |
| H | 0.0055774  | 2.4967428  | -0.0000990 |
| H | -2.1314898 | 1.2299777  | -0.0000078 |

\$vibrational spectrum

| #  | mode | symmetry | wave number | IR intensity | selection rules |       |
|----|------|----------|-------------|--------------|-----------------|-------|
| #  |      |          | cm**(-1)    | km/mol       | IR              | RAMAN |
| 1  |      |          | 0.00        | 0.00000      | -               | -     |
| 2  |      |          | 0.00        | 0.00000      | -               | -     |
| 3  |      |          | 0.00        | 0.00000      | -               | -     |
| 4  |      |          | 0.00        | 0.00000      | -               | -     |
| 5  |      |          | 0.00        | 0.00000      | -               | -     |
| 6  |      |          | 0.00        | 0.00000      | -               | -     |
| 7  |      | a        | 236.87      | 0.00001      | YES             | YES   |
| 8  |      | a        | 289.81      | 2.66351      | YES             | YES   |
| 9  |      | a        | 344.34      | 0.05222      | YES             | YES   |
| 10 |      | a        | 415.57      | 0.00000      | YES             | YES   |
| 11 |      | a        | 604.96      | 0.00000      | YES             | YES   |
| 12 |      | a        | 684.87      | 83.75739     | YES             | YES   |
| 13 |      | a        | 800.01      | 0.00000      | YES             | YES   |
| 14 |      | a        | 909.78      | 0.00000      | YES             | YES   |
| 15 |      | a        | 953.11      | 0.00000      | YES             | YES   |
| 16 |      | a        | 964.97      | 28.59086     | YES             | YES   |
| 17 |      | a        | 981.48      | 0.00000      | YES             | YES   |
| 18 |      | a        | 1013.36     | 5.05950      | YES             | YES   |
| 19 |      | a        | 1018.76     | 0.06286      | YES             | YES   |
| 20 |      | a        | 1033.41     | 0.03048      | YES             | YES   |
| 21 |      | a        | 1045.49     | 0.00000      | YES             | YES   |
| 22 |      | a        | 1071.77     | 11.47474     | YES             | YES   |
| 23 |      | a        | 1205.83     | 2.89091      | YES             | YES   |
| 24 |      | a        | 1220.78     | 0.00000      | YES             | YES   |
| 25 |      | a        | 1373.31     | 0.00000      | YES             | YES   |
| 26 |      | a        | 1396.32     | 0.00000      | YES             | YES   |
| 27 |      | a        | 1403.30     | 34.71736     | YES             | YES   |
| 28 |      | a        | 1461.13     | 116.90904    | YES             | YES   |
| 29 |      | a        | 1548.92     | 47.28058     | YES             | YES   |
| 30 |      | a        | 1670.18     | 0.00000      | YES             | YES   |
| 31 |      | a        | 3192.11     | 1.92887      | YES             | YES   |
| 32 |      | a        | 3195.44     | 0.00000      | YES             | YES   |
| 33 |      | a        | 3206.78     | 0.00000      | YES             | YES   |
| 34 |      | a        | 3209.83     | 8.59029      | YES             | YES   |
| 35 |      | a        | 3217.89     | 16.21074     | YES             | YES   |
| 36 |      | a        | 3220.53     | 0.00000      | YES             | YES   |

[Au(o-dfb)<sub>2</sub>]<sup>+</sup>

Symmetry: c2

Cartesian coordinates in Ångström:

|   |         |         |          |
|---|---------|---------|----------|
| C | 2.52021 | 2.52022 | -0.74336 |
| C | 2.36880 | 1.32936 | -1.40780 |
| F | 2.67255 | 3.65397 | -1.41036 |
| C | 2.21264 | 0.13726 | -0.66153 |



|    |          |          |          |
|----|----------|----------|----------|
| C  | 2.21733  | 0.19075  | 0.75787  |
| C  | 2.36936  | 1.42677  | 1.41445  |
| C  | 2.52330  | 2.56809  | 0.66491  |
| Au | 0.00000  | -0.00000 | -0.07317 |
| H  | 2.39945  | 1.31290  | -2.48764 |
| F  | 2.67888  | 3.74385  | 1.25094  |
| H  | 2.39723  | 1.49030  | 2.49262  |
| H  | 2.27400  | -0.72359 | 1.33219  |
| H  | 2.31802  | -0.81447 | -1.16571 |
| C  | -2.52021 | -2.52022 | -0.74336 |
| C  | -2.36880 | -1.32936 | -1.40780 |
| F  | -2.67255 | -3.65397 | -1.41036 |
| C  | -2.21264 | -0.13726 | -0.66153 |
| C  | -2.21733 | -0.19075 | 0.75787  |
| C  | -2.36936 | -1.42677 | 1.41445  |
| C  | -2.52330 | -2.56809 | 0.66491  |
| H  | -2.39945 | -1.31290 | -2.48764 |
| F  | -2.67888 | -3.74385 | 1.25094  |
| H  | -2.39723 | -1.49030 | 2.49262  |
| H  | -2.27400 | 0.72359  | 1.33219  |
| H  | -2.31802 | 0.81447  | -1.16571 |

\$vibrational spectrum

| #  | mode | symmetry | wave number<br>cm**(-1) | IR intensity<br>km/mol | selection rules |       |
|----|------|----------|-------------------------|------------------------|-----------------|-------|
| #  |      |          |                         |                        | IR              | RAMAN |
| 1  |      |          | -0.00                   | 0.00000                | -               | -     |
| 2  |      |          | -0.00                   | 0.00000                | -               | -     |
| 3  |      |          | -0.00                   | 0.00000                | -               | -     |
| 4  |      |          | -0.00                   | 0.00000                | -               | -     |
| 5  |      |          | 0.00                    | 0.00000                | -               | -     |
| 6  |      |          | 0.00                    | 0.00000                | -               | -     |
| 7  |      | a        | 5.44                    | 0.56684                | YES             | YES   |
| 8  |      | a        | 21.40                   | 4.09066                | YES             | YES   |
| 9  |      | b        | 27.62                   | 0.93269                | YES             | YES   |
| 10 |      | b        | 48.67                   | 0.53117                | YES             | YES   |
| 11 |      | a        | 54.22                   | 0.04085                | YES             | YES   |
| 12 |      | a        | 57.40                   | 0.01518                | YES             | YES   |
| 13 |      | b        | 98.92                   | 1.60425                | YES             | YES   |
| 14 |      | b        | 182.44                  | 0.73667                | YES             | YES   |
| 15 |      | a        | 186.22                  | 0.03670                | YES             | YES   |
| 16 |      | a        | 209.87                  | 0.04251                | YES             | YES   |
| 17 |      | b        | 216.63                  | 0.78392                | YES             | YES   |
| 18 |      | b        | 293.34                  | 0.65842                | YES             | YES   |
| 19 |      | a        | 293.69                  | 0.00413                | YES             | YES   |
| 20 |      | b        | 364.31                  | 0.36449                | YES             | YES   |
| 21 |      | a        | 374.78                  | 0.00001                | YES             | YES   |
| 22 |      | a        | 443.39                  | 0.37176                | YES             | YES   |
| 23 |      | b        | 443.94                  | 0.35198                | YES             | YES   |
| 24 |      | b        | 452.00                  | 1.83407                | YES             | YES   |
| 25 |      | a        | 455.04                  | 0.00576                | YES             | YES   |
| 26 |      | a        | 551.85                  | 8.75181                | YES             | YES   |
| 27 |      | b        | 552.39                  | 0.03536                | YES             | YES   |
| 28 |      | a        | 569.24                  | 1.90103                | YES             | YES   |
| 29 |      | b        | 573.65                  | 9.39961                | YES             | YES   |
| 30 |      | a        | 577.66                  | 0.09619                | YES             | YES   |
| 31 |      | b        | 579.30                  | 13.45896               | YES             | YES   |
| 32 |      | a        | 718.29                  | 0.06362                | YES             | YES   |
| 33 |      | b        | 718.67                  | 0.37453                | YES             | YES   |
| 34 |      | a        | 779.39                  | 0.13648                | YES             | YES   |
| 35 |      | b        | 779.41                  | 43.93371               | YES             | YES   |
| 36 |      | b        | 849.48                  | 141.26855              | YES             | YES   |
| 37 |      | a        | 853.79                  | 0.90496                | YES             | YES   |
| 38 |      | b        | 860.19                  | 1.03317                | YES             | YES   |
| 39 |      | a        | 862.04                  | 30.63776               | YES             | YES   |
| 40 |      | b        | 874.14                  | 4.35358                | YES             | YES   |
| 41 |      | a        | 875.63                  | 0.17436                | YES             | YES   |
| 42 |      | b        | 951.55                  | 13.03913               | YES             | YES   |
| 43 |      | a        | 954.79                  | 0.00075                | YES             | YES   |
| 44 |      | b        | 987.87                  | 8.36950                | YES             | YES   |
| 45 |      | a        | 992.10                  | 3.32190                | YES             | YES   |
| 46 |      | b        | 1008.26                 | 30.49719               | YES             | YES   |
| 47 |      | a        | 1011.93                 | 0.06632                | YES             | YES   |
| 48 |      | a        | 1111.10                 | 14.69402               | YES             | YES   |
| 49 |      | b        | 1111.59                 | 0.52945                | YES             | YES   |
| 50 |      | b        | 1175.36                 | 13.60819               | YES             | YES   |
| 51 |      | a        | 1175.64                 | 0.04573                | YES             | YES   |
| 52 |      | b        | 1251.72                 | 0.71595                | YES             | YES   |
| 53 |      | a        | 1251.99                 | 69.14729               | YES             | YES   |
| 54 |      | b        | 1299.26                 | 33.18403               | YES             | YES   |
| 55 |      | a        | 1299.57                 | 17.68841               | YES             | YES   |
| 56 |      | b        | 1307.01                 | 296.56074              | YES             | YES   |

|    |   |         |           |     |     |
|----|---|---------|-----------|-----|-----|
| 57 | a | 1310.32 | 1.08622   | YES | YES |
| 58 | b | 1373.42 | 89.64604  | YES | YES |
| 59 | a | 1377.15 | 0.45371   | YES | YES |
| 60 | a | 1468.59 | 29.52632  | YES | YES |
| 61 | b | 1468.63 | 0.25548   | YES | YES |
| 62 | b | 1537.95 | 744.36495 | YES | YES |
| 63 | a | 1541.83 | 0.62326   | YES | YES |
| 64 | b | 1583.39 | 64.47100  | YES | YES |
| 65 | a | 1587.32 | 0.00001   | YES | YES |
| 66 | b | 1633.71 | 1.93232   | YES | YES |
| 67 | a | 1634.15 | 49.17207  | YES | YES |
| 68 | a | 3180.93 | 2.27380   | YES | YES |
| 69 | b | 3181.37 | 1.60378   | YES | YES |
| 70 | b | 3195.78 | 3.74287   | YES | YES |
| 71 | a | 3196.14 | 0.16451   | YES | YES |
| 72 | a | 3213.35 | 21.57955  | YES | YES |
| 73 | b | 3213.37 | 0.19093   | YES | YES |
| 74 | b | 3214.88 | 2.63626   | YES | YES |
| 75 | a | 3214.95 | 0.75688   | YES | YES |

[Au(o-dfb)(CO)]<sup>+</sup>

Symmetry: c1

Cartesian coordinates in Ångström:

|    |            |            |            |
|----|------------|------------|------------|
| Au | 1.6780005  | 1.0381383  | 0.0506780  |
| C  | -0.9446913 | -0.9076500 | -1.2020267 |
| C  | -0.7066372 | 0.4487857  | -1.2292015 |
| F  | -1.0972362 | -1.5917888 | -2.3234416 |
| C  | -0.5340900 | 1.1527985  | -0.0022612 |
| C  | -0.6524808 | 0.4471294  | 1.2275968  |
| C  | -0.8903396 | -0.9203529 | 1.2307066  |
| C  | -1.0475568 | -1.5837816 | 0.0230625  |
| H  | -0.6881030 | 0.9668078  | -2.1779772 |
| F  | -1.2906668 | -2.8770954 | 0.0063418  |
| H  | -0.9820375 | -1.4789974 | 2.1513343  |
| H  | -0.6001430 | 0.9885324  | 2.1615253  |
| H  | -0.6372966 | 2.2335872  | -0.0052464 |
| C  | 3.6370126  | 1.0348691  | 0.0455151  |
| O  | 4.7562655  | 1.0490177  | 0.0433941  |

\$vibrational spectrum

| #  | mode | symmetry | wave number<br>cm**(-1) | IR intensity<br>km/mol | selection rules<br>IR | RAMAN |
|----|------|----------|-------------------------|------------------------|-----------------------|-------|
| #  |      |          |                         |                        |                       |       |
| 1  |      |          | -0.00                   | 0.00000                | -                     | -     |
| 2  |      |          | 0.00                    | 0.00000                | -                     | -     |
| 3  |      |          | 0.00                    | 0.00000                | -                     | -     |
| 4  |      |          | 0.00                    | 0.00000                | -                     | -     |
| 5  |      |          | 0.00                    | 0.00000                | -                     | -     |
| 6  |      |          | 0.00                    | 0.00000                | -                     | -     |
| 7  |      | a        | 41.41                   | 0.18377                | YES                   | YES   |
| 8  |      | a        | 55.53                   | 0.23474                | YES                   | YES   |
| 9  |      | a        | 67.72                   | 1.47300                | YES                   | YES   |
| 10 |      | a        | 74.10                   | 0.78316                | YES                   | YES   |
| 11 |      | a        | 167.31                  | 0.63582                | YES                   | YES   |
| 12 |      | a        | 253.56                  | 0.52669                | YES                   | YES   |
| 13 |      | a        | 293.93                  | 0.35766                | YES                   | YES   |
| 14 |      | a        | 360.13                  | 0.15434                | YES                   | YES   |
| 15 |      | a        | 369.93                  | 7.22056                | YES                   | YES   |
| 16 |      | a        | 373.19                  | 5.95074                | YES                   | YES   |
| 17 |      | a        | 389.35                  | 14.56849               | YES                   | YES   |
| 18 |      | a        | 444.72                  | 1.27093                | YES                   | YES   |
| 19 |      | a        | 465.25                  | 2.76657                | YES                   | YES   |
| 20 |      | a        | 553.62                  | 6.87950                | YES                   | YES   |
| 21 |      | a        | 573.31                  | 11.35834               | YES                   | YES   |
| 22 |      | a        | 598.14                  | 5.26224                | YES                   | YES   |
| 23 |      | a        | 732.00                  | 2.78516                | YES                   | YES   |
| 24 |      | a        | 781.77                  | 18.47536               | YES                   | YES   |
| 25 |      | a        | 848.13                  | 76.54458               | YES                   | YES   |
| 26 |      | a        | 867.69                  | 21.25344               | YES                   | YES   |
| 27 |      | a        | 890.95                  | 22.96250               | YES                   | YES   |
| 28 |      | a        | 961.98                  | 25.02090               | YES                   | YES   |
| 29 |      | a        | 994.60                  | 27.05698               | YES                   | YES   |
| 30 |      | a        | 1021.36                 | 2.73145                | YES                   | YES   |
| 31 |      | a        | 1112.06                 | 10.09235               | YES                   | YES   |
| 32 |      | a        | 1176.78                 | 4.43954                | YES                   | YES   |
| 33 |      | a        | 1254.11                 | 30.00958               | YES                   | YES   |
| 34 |      | a        | 1296.14                 | 35.05243               | YES                   | YES   |
| 35 |      | a        | 1325.82                 | 140.66743              | YES                   | YES   |
| 36 |      | a        | 1374.69                 | 6.24248                | YES                   | YES   |
| 37 |      | a        | 1469.38                 | 30.82930               | YES                   | YES   |
| 38 |      | a        | 1538.47                 | 254.59402              | YES                   | YES   |

|    |   |         |           |     |     |
|----|---|---------|-----------|-----|-----|
| 39 | a | 1590.81 | 100.08664 | YES | YES |
| 40 | a | 1620.30 | 50.53258  | YES | YES |
| 41 | a | 2269.60 | 448.21116 | YES | YES |
| 42 | a | 3145.38 | 9.06225   | YES | YES |
| 43 | a | 3201.61 | 2.02940   | YES | YES |
| 44 | a | 3206.46 | 11.94538  | YES | YES |
| 45 | a | 3214.12 | 8.84219   | YES | YES |

o-dfb

Symmetry: c2v

Cartesian coordinates in Ångström:

|   |            |           |            |
|---|------------|-----------|------------|
| H | 1.2390071  | 0.0000000 | -2.1769595 |
| H | 2.4758962  | 0.0000000 | -0.0113956 |
| F | 1.3492114  | 0.0000000 | 2.3225347  |
| C | 1.3954532  | 0.0000000 | -0.0412187 |
| C | 0.6943789  | 0.0000000 | 1.1502596  |
| C | -0.6943789 | 0.0000000 | 1.1502596  |
| F | -1.3492114 | 0.0000000 | 2.3225347  |
| C | -1.3954532 | 0.0000000 | -0.0412187 |
| C | -0.6948598 | 0.0000000 | -1.2431320 |
| C | 0.6948598  | 0.0000000 | -1.2431320 |
| H | -1.2390071 | 0.0000000 | -2.1769595 |
| H | -2.4758962 | 0.0000000 | -0.0113956 |

\$vibrational spectrum

| #  | mode | symmetry | wave number<br>cm**(-1) | IR intensity<br>km/mol | selection rules<br>IR | RAMAN |
|----|------|----------|-------------------------|------------------------|-----------------------|-------|
| 1  |      |          | -0.00                   | 0.00000                | -                     | -     |
| 2  |      |          | -0.00                   | 0.00000                | -                     | -     |
| 3  |      |          | -0.00                   | 0.00000                | -                     | -     |
| 4  |      |          | 0.00                    | 0.00000                | -                     | -     |
| 5  |      |          | 0.00                    | 0.00000                | -                     | -     |
| 6  |      |          | 0.00                    | 0.00000                | -                     | -     |
| 7  |      | a2       | 188.40                  | 0.00000                | NO                    | YES   |
| 8  |      | a1       | 288.40                  | 0.22991                | YES                   | YES   |
| 9  |      | b2       | 292.75                  | 0.01938                | YES                   | YES   |
| 10 |      | b1       | 444.75                  | 0.07729                | YES                   | YES   |
| 11 |      | b2       | 463.70                  | 3.68288                | YES                   | YES   |
| 12 |      | b1       | 552.90                  | 3.67970                | YES                   | YES   |
| 13 |      | a2       | 565.47                  | 0.00000                | NO                    | YES   |
| 14 |      | a1       | 584.99                  | 4.84546                | YES                   | YES   |
| 15 |      | a2       | 704.45                  | 0.00000                | NO                    | YES   |
| 16 |      | b2       | 767.10                  | 80.37443               | YES                   | YES   |
| 17 |      | a1       | 778.51                  | 33.79457               | YES                   | YES   |
| 18 |      | a2       | 857.84                  | 0.00000                | NO                    | YES   |
| 19 |      | b1       | 865.07                  | 19.60648               | YES                   | YES   |
| 20 |      | b2       | 948.91                  | 4.77600                | YES                   | YES   |
| 21 |      | a2       | 972.97                  | 0.00000                | NO                    | YES   |
| 22 |      | a1       | 1050.18                 | 6.55896                | YES                   | YES   |
| 23 |      | b1       | 1125.87                 | 21.07062               | YES                   | YES   |
| 24 |      | a1       | 1178.64                 | 1.18617                | YES                   | YES   |
| 25 |      | b1       | 1222.85                 | 40.61803               | YES                   | YES   |
| 26 |      | b1       | 1292.49                 | 3.69984                | YES                   | YES   |
| 27 |      | a1       | 1297.08                 | 142.56419              | YES                   | YES   |
| 28 |      | a1       | 1335.99                 | 0.05318                | YES                   | YES   |
| 29 |      | b1       | 1494.70                 | 11.16537               | YES                   | YES   |
| 30 |      | a1       | 1544.94                 | 182.15826              | YES                   | YES   |
| 31 |      | b1       | 1643.72                 | 8.40292                | YES                   | YES   |
| 32 |      | a1       | 1648.22                 | 21.81101               | YES                   | YES   |
| 33 |      | b1       | 3183.93                 | 1.01254                | YES                   | YES   |
| 34 |      | a1       | 3195.05                 | 7.92313                | YES                   | YES   |
| 35 |      | b1       | 3203.23                 | 3.02252                | YES                   | YES   |
| 36 |      | a1       | 3208.85                 | 1.93719                | YES                   | YES   |

[o-dfb]<sup>+</sup>

Symmetry: c2v

Cartesian coordinates in Ångström:

|   |            |           |            |
|---|------------|-----------|------------|
| H | 1.2376139  | 0.0000000 | -2.1659502 |
| H | 2.5217220  | 0.0000000 | -0.0198233 |
| F | 1.3147935  | 0.0000000 | 2.2998106  |
| C | 1.4411946  | 0.0000000 | -0.0425829 |
| C | 0.7265965  | 0.0000000 | 1.1449965  |
| C | -0.7265965 | 0.0000000 | 1.1449965  |
| F | -1.3147935 | 0.0000000 | 2.2998106  |
| C | -1.4411946 | 0.0000000 | -0.0425829 |
| C | -0.7199454 | 0.0000000 | -1.2164506 |
| C | 0.7199454  | 0.0000000 | -1.2164506 |
| H | -1.2376139 | 0.0000000 | -2.1659502 |
| H | -2.5217220 | 0.0000000 | -0.0198233 |

| \$vibrational spectrum |      |          |             |              |                 |       |
|------------------------|------|----------|-------------|--------------|-----------------|-------|
| #                      | mode | symmetry | wave number | IR intensity | selection rules |       |
| #                      |      |          | cm**(-1)    | km/mol       | IR              | RAMAN |
| 1                      |      |          | -0.00       | 0.00000      | -               | -     |
| 2                      |      |          | 0.00        | 0.00000      | -               | -     |
| 3                      |      |          | 0.00        | 0.00000      | -               | -     |
| 4                      |      |          | 0.00        | 0.00000      | -               | -     |
| 5                      |      |          | 0.00        | 0.00000      | -               | -     |
| 6                      |      |          | 0.00        | 0.00000      | -               | -     |
| 7                      |      | a2       | 149.23      | 0.00000      | NO              | YES   |
| 8                      |      | b2       | 260.72      | 0.07748      | YES             | YES   |
| 9                      |      | a1       | 298.91      | 1.80515      | YES             | YES   |
| 10                     |      | b1       | 395.28      | 4.27031      | YES             | YES   |
| 11                     |      | a2       | 421.66      | 0.00000      | NO              | YES   |
| 12                     |      | b2       | 452.04      | 0.17637      | YES             | YES   |
| 13                     |      | b1       | 533.14      | 12.60357     | YES             | YES   |
| 14                     |      | a1       | 572.99      | 3.19278      | YES             | YES   |
| 15                     |      | a2       | 732.76      | 0.00000      | NO              | YES   |
| 16                     |      | a1       | 763.77      | 11.12891     | YES             | YES   |
| 17                     |      | b2       | 780.44      | 80.45664     | YES             | YES   |
| 18                     |      | b1       | 857.50      | 5.38045      | YES             | YES   |
| 19                     |      | a2       | 877.99      | 0.00000      | NO              | YES   |
| 20                     |      | a1       | 982.11      | 12.37555     | YES             | YES   |
| 21                     |      | b2       | 992.64      | 7.59263      | YES             | YES   |
| 22                     |      | a2       | 1010.80     | 0.00000      | NO              | YES   |
| 23                     |      | b1       | 1125.77     | 24.99350     | YES             | YES   |
| 24                     |      | a1       | 1196.51     | 2.50523      | YES             | YES   |
| 25                     |      | b1       | 1206.64     | 6.09384      | YES             | YES   |
| 26                     |      | b1       | 1345.26     | 11.99666     | YES             | YES   |
| 27                     |      | a1       | 1364.36     | 50.77697     | YES             | YES   |
| 28                     |      | a1       | 1400.83     | 4.89016      | YES             | YES   |
| 29                     |      | b1       | 1473.32     | 81.74663     | YES             | YES   |
| 30                     |      | a1       | 1515.64     | 606.20521    | YES             | YES   |
| 31                     |      | b1       | 1534.74     | 8.25084      | YES             | YES   |
| 32                     |      | a1       | 1576.76     | 12.20859     | YES             | YES   |
| 33                     |      | b1       | 3202.14     | 0.07421      | YES             | YES   |
| 34                     |      | a1       | 3209.34     | 3.89564      | YES             | YES   |
| 35                     |      | b1       | 3216.97     | 43.73246     | YES             | YES   |
| 36                     |      | a1       | 3219.51     | 6.34992      | YES             | YES   |

[Au(4FB)<sub>2</sub>]<sup>+</sup>

Symmetry: c2

Cartesian coordinates in Ångström:

|    |          |          |          |
|----|----------|----------|----------|
| H  | -2.31510 | 1.13454  | -0.97894 |
| C  | 0.86050  | -2.63678 | -1.39455 |
| F  | -1.05345 | 2.61288  | -2.70610 |
| C  | 1.54447  | -1.76796 | -0.56412 |
| F  | 1.05345  | -2.61288 | -2.70610 |
| C  | 1.30224  | -1.79349 | 0.84197  |
| C  | 0.40243  | -2.75877 | 1.35567  |
| C  | -0.26957 | -3.62487 | 0.51136  |
| F  | 0.67819  | 4.38879  | -1.66153 |
| C  | -0.03451 | -3.56580 | -0.86648 |
| Au | 0.00000  | -0.00000 | 0.57424  |
| C  | -0.86050 | 2.63678  | -1.39455 |
| H  | 2.31510  | -1.13454 | -0.97894 |
| C  | 0.03451  | 3.56580  | -0.86648 |
| C  | 0.26957  | 3.62487  | 0.51136  |
| F  | 1.12107  | 4.51141  | 0.98930  |
| C  | -0.40243 | 2.75877  | 1.35567  |
| C  | -1.30224 | 1.79349  | 0.84197  |
| C  | -1.54447 | 1.76796  | -0.56412 |
| F  | -0.67819 | -4.38879 | -1.66153 |
| H  | -2.03321 | 1.37594  | 1.52551  |
| F  | -0.22525 | 2.85664  | 2.66078  |
| F  | -1.12107 | -4.51141 | 0.98930  |
| F  | 0.22525  | -2.85664 | 2.66078  |
| H  | 2.03321  | -1.37594 | 1.52551  |

| \$vibrational spectrum |      |          |             |              |                 |       |
|------------------------|------|----------|-------------|--------------|-----------------|-------|
| #                      | mode | symmetry | wave number | IR intensity | selection rules |       |
| #                      |      |          | cm**(-1)    | km/mol       | IR              | RAMAN |
| 1                      |      |          | -0.00       | 0.00000      | -               | -     |
| 2                      |      |          | 0.00        | 0.00000      | -               | -     |
| 3                      |      |          | 0.00        | 0.00000      | -               | -     |
| 4                      |      |          | 0.00        | 0.00000      | -               | -     |
| 5                      |      |          | 0.00        | 0.00000      | -               | -     |
| 6                      |      |          | 0.00        | 0.00000      | -               | -     |
| 7                      |      | a        | 2.70        | 0.41176      | YES             | YES   |

|    |   |         |           |     |     |
|----|---|---------|-----------|-----|-----|
| 8  | a | 25.68   | 0.00163   | YES | YES |
| 9  | b | 26.42   | 0.23565   | YES | YES |
| 10 | b | 32.26   | 1.79660   | YES | YES |
| 11 | a | 39.25   | 1.01631   | YES | YES |
| 12 | a | 50.58   | 0.07382   | YES | YES |
| 13 | b | 83.45   | 0.74054   | YES | YES |
| 14 | a | 117.09  | 0.04492   | YES | YES |
| 15 | b | 130.34  | 1.30257   | YES | YES |
| 16 | a | 151.06  | 0.00101   | YES | YES |
| 17 | b | 151.11  | 0.79433   | YES | YES |
| 18 | a | 234.91  | 0.17571   | YES | YES |
| 19 | b | 240.24  | 2.08583   | YES | YES |
| 20 | b | 280.79  | 0.13903   | YES | YES |
| 21 | a | 280.90  | 0.02494   | YES | YES |
| 22 | b | 287.41  | 0.69243   | YES | YES |
| 23 | a | 287.64  | 1.35271   | YES | YES |
| 24 | b | 324.93  | 3.59131   | YES | YES |
| 25 | a | 325.25  | 0.01321   | YES | YES |
| 26 | b | 331.42  | 0.66759   | YES | YES |
| 27 | a | 332.17  | 0.16071   | YES | YES |
| 28 | b | 396.62  | 28.26889  | YES | YES |
| 29 | a | 412.57  | 0.02999   | YES | YES |
| 30 | a | 456.92  | 0.41167   | YES | YES |
| 31 | b | 457.22  | 1.99875   | YES | YES |
| 32 | a | 486.93  | 0.06471   | YES | YES |
| 33 | b | 487.16  | 2.63078   | YES | YES |
| 34 | b | 565.64  | 22.56099  | YES | YES |
| 35 | a | 572.00  | 0.52853   | YES | YES |
| 36 | b | 609.90  | 4.73815   | YES | YES |
| 37 | a | 611.43  | 1.74288   | YES | YES |
| 38 | a | 651.35  | 0.51722   | YES | YES |
| 39 | b | 651.85  | 2.87532   | YES | YES |
| 40 | a | 694.19  | 0.58563   | YES | YES |
| 41 | b | 695.41  | 30.25530  | YES | YES |
| 42 | b | 740.86  | 4.38457   | YES | YES |
| 43 | a | 741.86  | 2.31848   | YES | YES |
| 44 | b | 759.77  | 0.45340   | YES | YES |
| 45 | a | 761.03  | 19.44334  | YES | YES |
| 46 | b | 869.00  | 133.20553 | YES | YES |
| 47 | a | 870.99  | 1.21653   | YES | YES |
| 48 | b | 930.09  | 96.36516  | YES | YES |
| 49 | a | 946.37  | 21.41899  | YES | YES |
| 50 | b | 1015.92 | 7.55522   | YES | YES |
| 51 | a | 1016.34 | 180.74232 | YES | YES |
| 52 | b | 1066.55 | 134.71660 | YES | YES |
| 53 | a | 1067.67 | 2.10248   | YES | YES |
| 54 | b | 1188.82 | 66.68657  | YES | YES |
| 55 | a | 1190.04 | 2.02189   | YES | YES |
| 56 | b | 1257.08 | 18.45081  | YES | YES |
| 57 | a | 1258.47 | 152.58998 | YES | YES |
| 58 | b | 1310.77 | 157.77858 | YES | YES |
| 59 | a | 1316.65 | 21.08864  | YES | YES |
| 60 | b | 1321.81 | 54.53107  | YES | YES |
| 61 | a | 1326.28 | 0.37633   | YES | YES |
| 62 | b | 1359.02 | 18.54915  | YES | YES |
| 63 | a | 1362.74 | 10.34417  | YES | YES |
| 64 | b | 1511.32 | 93.79311  | YES | YES |
| 65 | a | 1515.26 | 515.35769 | YES | YES |
| 66 | b | 1531.08 | 694.19151 | YES | YES |
| 67 | a | 1537.36 | 60.92493  | YES | YES |
| 68 | b | 1608.50 | 35.38119  | YES | YES |
| 69 | a | 1609.71 | 84.70087  | YES | YES |
| 70 | b | 1630.34 | 15.82832  | YES | YES |
| 71 | a | 1632.07 | 114.94274 | YES | YES |
| 72 | a | 3163.96 | 9.74795   | YES | YES |
| 73 | b | 3164.02 | 17.26386  | YES | YES |
| 74 | b | 3210.76 | 21.35363  | YES | YES |
| 75 | a | 3210.79 | 0.87156   | YES | YES |

[Au(4FB)(CO)]<sup>+</sup>

Symmetry: c1

Cartesian coordinates in Ångström:

|    |            |            |            |
|----|------------|------------|------------|
| Au | 1.7337163  | 1.0673226  | 0.0596135  |
| C  | -0.9948095 | -0.9348934 | -1.2130310 |
| C  | -0.7131586 | 0.4235704  | -1.2252479 |
| F  | -1.1883481 | -1.5946065 | -2.3355897 |
| C  | -0.4763676 | 1.1309794  | -0.0177880 |
| C  | -0.6240921 | 0.4324207  | 1.2221203  |
| C  | -0.9019125 | -0.9154654 | 1.2181766  |
| C  | -1.0950765 | -1.6000081 | 0.0103767  |

|   |            |            |            |
|---|------------|------------|------------|
| F | -0.6986207 | 1.0677638  | -2.3741236 |
| F | -1.3642503 | -2.8803331 | 0.0221363  |
| F | -1.0122254 | -1.5948832 | 2.3473318  |
| H | -0.5602299 | 0.9616548  | 2.1621662  |
| H | -0.6142587 | 2.2085432  | -0.0407222 |
| C | 3.6956774  | 1.0982572  | 0.0795544  |
| O | 4.8139563  | 1.1296778  | 0.0850266  |

\$vibrational spectrum

| # | mode | symmetry | wave number<br>cm**(-1) | IR intensity<br>km/mol | selection rules |       |
|---|------|----------|-------------------------|------------------------|-----------------|-------|
| # |      |          |                         |                        | IR              | RAMAN |
|   | 1    |          | -0.00                   | 0.00000                | -               | -     |
|   | 2    |          | 0.00                    | 0.00000                | -               | -     |
|   | 3    |          | 0.00                    | 0.00000                | -               | -     |
|   | 4    |          | 0.00                    | 0.00000                | -               | -     |
|   | 5    |          | 0.00                    | 0.00000                | -               | -     |
|   | 6    |          | 0.00                    | 0.00000                | -               | -     |
|   | 7    | a        | 38.34                   | 0.07708                | YES             | YES   |
|   | 8    | a        | 46.13                   | 0.12883                | YES             | YES   |
|   | 9    | a        | 66.67                   | 0.64593                | YES             | YES   |
|   | 10   | a        | 73.13                   | 0.25615                | YES             | YES   |
|   | 11   | a        | 124.76                  | 0.40460                | YES             | YES   |
|   | 12   | a        | 150.27                  | 0.21049                | YES             | YES   |
|   | 13   | a        | 249.88                  | 1.67460                | YES             | YES   |
|   | 14   | a        | 280.79                  | 0.09942                | YES             | YES   |
|   | 15   | a        | 288.57                  | 0.64238                | YES             | YES   |
|   | 16   | a        | 326.22                  | 0.99878                | YES             | YES   |
|   | 17   | a        | 327.73                  | 1.10100                | YES             | YES   |
|   | 18   | a        | 368.79                  | 5.83817                | YES             | YES   |
|   | 19   | a        | 369.45                  | 6.23216                | YES             | YES   |
|   | 20   | a        | 384.60                  | 11.23649               | YES             | YES   |
|   | 21   | a        | 427.83                  | 7.00202                | YES             | YES   |
|   | 22   | a        | 457.29                  | 1.81446                | YES             | YES   |
|   | 23   | a        | 487.95                  | 1.07963                | YES             | YES   |
|   | 24   | a        | 574.74                  | 9.90095                | YES             | YES   |
|   | 25   | a        | 614.39                  | 2.50247                | YES             | YES   |
|   | 26   | a        | 659.01                  | 1.15111                | YES             | YES   |
|   | 27   | a        | 695.17                  | 12.52021               | YES             | YES   |
|   | 28   | a        | 747.50                  | 5.55508                | YES             | YES   |
|   | 29   | a        | 761.95                  | 9.44558                | YES             | YES   |
|   | 30   | a        | 874.09                  | 79.99588               | YES             | YES   |
|   | 31   | a        | 934.93                  | 68.95944               | YES             | YES   |
|   | 32   | a        | 1018.94                 | 94.96313               | YES             | YES   |
|   | 33   | a        | 1067.68                 | 57.93478               | YES             | YES   |
|   | 34   | a        | 1192.80                 | 41.67182               | YES             | YES   |
|   | 35   | a        | 1259.49                 | 74.21409               | YES             | YES   |
|   | 36   | a        | 1316.36                 | 65.80889               | YES             | YES   |
|   | 37   | a        | 1326.98                 | 12.57306               | YES             | YES   |
|   | 38   | a        | 1373.73                 | 11.61917               | YES             | YES   |
|   | 39   | a        | 1514.03                 | 312.51245              | YES             | YES   |
|   | 40   | a        | 1535.49                 | 376.31045              | YES             | YES   |
|   | 41   | a        | 1605.33                 | 98.15560               | YES             | YES   |
|   | 42   | a        | 1626.84                 | 27.50599               | YES             | YES   |
|   | 43   | a        | 2274.79                 | 427.41074              | YES             | YES   |
|   | 44   | a        | 3141.21                 | 22.92612               | YES             | YES   |
|   | 45   | a        | 3210.36                 | 16.67091               | YES             | YES   |

4FB

Symmetry: c2v

Cartesian coordinates in Ångström:

|   |          |         |          |
|---|----------|---------|----------|
| H | 1.25576  | 0.00000 | -2.16986 |
| F | 2.71867  | 0.00000 | -0.02178 |
| F | 1.35683  | 0.00000 | 2.32039  |
| C | 1.37829  | 0.00000 | -0.04564 |
| C | 0.69418  | 0.00000 | 1.16376  |
| C | -0.69418 | 0.00000 | 1.16376  |
| F | -1.35683 | 0.00000 | 2.32039  |
| C | -1.37829 | 0.00000 | -0.04564 |
| C | -0.69546 | 0.00000 | -1.24673 |
| C | 0.69546  | 0.00000 | -1.24673 |
| H | -1.25576 | 0.00000 | -2.16986 |
| F | -2.71867 | 0.00000 | -0.02178 |

\$vibrational spectrum

| # | mode | symmetry | wave number<br>cm**(-1) | IR intensity<br>km/mol | selection rules |       |
|---|------|----------|-------------------------|------------------------|-----------------|-------|
| # |      |          |                         |                        | IR              | RAMAN |
|   | 1    |          | -0.00                   | 0.00000                | -               | -     |
|   | 2    |          | -0.00                   | 0.00000                | -               | -     |
|   | 3    |          | 0.00                    | 0.00000                | -               | -     |
|   | 4    |          | 0.00                    | 0.00000                | -               | -     |

|    |    |         |           |     |     |
|----|----|---------|-----------|-----|-----|
| 5  |    | 0.00    | 0.00000   | -   | -   |
| 6  |    | 0.00    | 0.00000   | -   | -   |
| 7  | a2 | 155.58  | 0.00000   | NO  | YES |
| 8  | b2 | 156.12  | 1.47479   | YES | YES |
| 9  | a1 | 278.75  | 0.03725   | YES | YES |
| 10 | b1 | 284.71  | 0.30491   | YES | YES |
| 11 | b2 | 288.84  | 0.01737   | YES | YES |
| 12 | a1 | 324.54  | 1.98548   | YES | YES |
| 13 | a2 | 374.73  | 0.00000   | NO  | YES |
| 14 | a1 | 461.99  | 0.05570   | YES | YES |
| 15 | b1 | 491.79  | 0.01339   | YES | YES |
| 16 | a2 | 550.23  | 0.00000   | NO  | YES |
| 17 | b2 | 609.40  | 7.87094   | YES | YES |
| 18 | b1 | 610.85  | 1.88768   | YES | YES |
| 19 | a1 | 694.72  | 20.33590  | YES | YES |
| 20 | a2 | 715.09  | 0.00000   | NO  | YES |
| 21 | b1 | 756.50  | 19.00484  | YES | YES |
| 22 | b2 | 817.37  | 42.44647  | YES | YES |
| 23 | a2 | 928.22  | 0.00000   | NO  | YES |
| 24 | b1 | 999.65  | 150.93449 | YES | YES |
| 25 | a1 | 1066.96 | 73.68524  | YES | YES |
| 26 | a1 | 1182.91 | 24.61319  | YES | YES |
| 27 | b1 | 1257.14 | 71.04232  | YES | YES |
| 28 | b1 | 1282.93 | 28.93074  | YES | YES |
| 29 | a1 | 1325.68 | 0.85646   | YES | YES |
| 30 | a1 | 1348.25 | 33.04320  | YES | YES |
| 31 | a1 | 1536.73 | 171.82431 | YES | YES |
| 32 | b1 | 1542.24 | 290.10518 | YES | YES |
| 33 | a1 | 1657.46 | 5.80957   | YES | YES |
| 34 | b1 | 1657.53 | 14.09743  | YES | YES |
| 35 | b1 | 3207.42 | 0.61940   | YES | YES |
| 36 | a1 | 3218.88 | 0.63538   | YES | YES |

[4FB]+

Symmetry: c1

Cartesian coordinates in Ångström:

|   |            |            |            |
|---|------------|------------|------------|
| H | 1.2606955  | -0.0000878 | -2.1835324 |
| F | 2.6479095  | 0.0000544  | -0.0046948 |
| F | 1.3617135  | 0.0000375  | 2.3303407  |
| C | 1.3553906  | 0.0000122  | -0.0284140 |
| C | 0.6724076  | 0.0000332  | 1.2234954  |
| C | -0.6992791 | 0.0000010  | 1.2200219  |
| F | -1.3942224 | -0.0001650 | 2.3235705  |
| C | -1.3746931 | 0.0000552  | -0.0351729 |
| C | -0.6865290 | 0.0000206  | -1.2783633 |
| C | 0.6745721  | -0.0000415 | -1.2749898 |
| H | -1.2679654 | -0.0000139 | -2.1899416 |
| F | -2.6673698 | 0.0000941  | -0.0198797 |

\$vibrational spectrum

| #  | mode | symmetry | wave number<br>cm**(-1) | IR intensity<br>km/mol | selection rules<br>IR | RAMAN |
|----|------|----------|-------------------------|------------------------|-----------------------|-------|
| #  |      |          |                         |                        |                       |       |
| 1  |      |          | -0.00                   | 0.00000                | -                     | -     |
| 2  |      |          | -0.00                   | 0.00000                | -                     | -     |
| 3  |      |          | -0.00                   | 0.00000                | -                     | -     |
| 4  |      |          | -0.00                   | 0.00000                | -                     | -     |
| 5  |      |          | 0.00                    | 0.00000                | -                     | -     |
| 6  |      |          | 0.00                    | 0.00000                | -                     | -     |
| 7  | a    |          | 128.57                  | 3.58609                | YES                   | YES   |
| 8  | a    |          | 134.84                  | 0.00004                | YES                   | YES   |
| 9  | a    |          | 271.93                  | 0.07496                | YES                   | YES   |
| 10 | a    |          | 277.60                  | 0.17145                | YES                   | YES   |
| 11 | a    |          | 286.49                  | 1.76158                | YES                   | YES   |
| 12 | a    |          | 328.04                  | 0.00002                | YES                   | YES   |
| 13 | a    |          | 341.63                  | 5.64354                | YES                   | YES   |
| 14 | a    |          | 409.16                  | 16.65370               | YES                   | YES   |
| 15 | a    |          | 453.44                  | 0.94840                | YES                   | YES   |
| 16 | a    |          | 566.74                  | 0.00013                | YES                   | YES   |
| 17 | a    |          | 603.57                  | 4.73985                | YES                   | YES   |
| 18 | a    |          | 606.67                  | 0.00424                | YES                   | YES   |
| 19 | a    |          | 683.60                  | 20.75113               | YES                   | YES   |
| 20 | a    |          | 723.41                  | 0.00000                | YES                   | YES   |
| 21 | a    |          | 748.54                  | 18.51985               | YES                   | YES   |
| 22 | a    |          | 831.08                  | 46.37591               | YES                   | YES   |
| 23 | a    |          | 982.94                  | 0.00007                | YES                   | YES   |
| 24 | a    |          | 1010.54                 | 11.59141               | YES                   | YES   |
| 25 | a    |          | 1104.52                 | 65.82208               | YES                   | YES   |
| 26 | a    |          | 1223.37                 | 52.27512               | YES                   | YES   |
| 27 | a    |          | 1227.08                 | 10.97479               | YES                   | YES   |
| 28 | a    |          | 1349.89                 | 157.60202              | YES                   | YES   |

|    |   |         |           |     |     |
|----|---|---------|-----------|-----|-----|
| 29 | a | 1363.53 | 21.60245  | YES | YES |
| 30 | a | 1383.64 | 252.69671 | YES | YES |
| 31 | a | 1440.77 | 1.87827   | YES | YES |
| 32 | a | 1491.43 | 604.62316 | YES | YES |
| 33 | a | 1597.22 | 181.24968 | YES | YES |
| 34 | a | 1686.08 | 45.48198  | YES | YES |
| 35 | a | 3209.30 | 7.33274   | YES | YES |
| 36 | a | 3218.64 | 44.38766  | YES | YES |



## 10. References

- 1 I. Krossing, *Chem. Eur. J.*, 2001, **7**, 490–502.
- 2 A. Martens, P. Weis, M. C. Krummer, M. Kreuzer, A. Meierhöfer, S. C. Meier, J. Bohnenberger, H. Scherer, I. Riddellstone and I. Krossing, *Chem. Sci.*, 2018, **9**, 7058–7068.
- 3 Bruker, *SAINT, V8.40A*, Bruker AXS Inc., Madison, Wisconsin, USA.
- 4 Bruker, *SADABS, 2016/2*, Bruker AXS Inc., Madison, Wisconsin, USA.
- 5 G. M. Sheldrick, *Acta Crystallogr., Sect. A: Found. Crystallogr.*, 2015, **71**, 3–8.
- 6 G. M. Sheldrick, *Acta Crystallogr., Sect. C: Cryst. Struct. Commun.*, 2015, **71**, 3–8.
- 7 C. B. Hübschle, G. M. Sheldrick and B. Dittrich, *J. Appl. Crystallogr.*, 2011, **44**, 1281–1284.
- 8 D. Kratzert and I. Krossing, *J. Appl. Crystallogr.*, 2018, **51**, 928–934.
- 9 D. Kratzert, J. J. Holstein and I. Krossing, *J. Appl. Crystallogr.*, 2015, **48**, 933–938.
- 10 D. Kratzert, *FinalCif, V118*, <https://www.xs3.uni-freiburg.de/research/finalcif>.
- 11 O. V. Dolomanov, L. J. Bourhis, R. J. Gildea, J. A. K. Howard and H. Puschmann, *J. Appl. Crystallogr.*, 2009, **42**, 339–341.
- 12 C. R. Groom, I. J. Bruno, M. P. Lightfoot and S. C. Ward, *Acta Crystallogr., Sect. B: Struct. Sci*, 2016, **72**, 171–179.
- 13 A. D. Becke, *J. Chem. Phys.*, 1993, **98**, 1372–1377.
- 14 A. D. Becke, *J. Chem. Phys.*, 1993, **98**, 5648–5652.
- 15 Lee, Yang and Parr, *Phys. Rev. B: Condens. Matter*, 1988, **37**, 785–789.
- 16 M. von Arnim and R. Ahlrichs, *J. Comput. Chem.*, 1998, **19**, 1746–1757.
- 17 O. Treutler and R. Ahlrichs, *J. Chem. Phys.*, 1995, **102**, 346–354.
- 18 F. Weigend and R. Ahlrichs, *Phys. Chem. Chem. Phys.*, 2005, **7**, 3297–3305.
- 19 M. Sierka, A. Hogekamp and R. Ahlrichs, *J. Chem. Phys.*, 2003, **118**, 9136–9148.
- 20 F. Weigend, *Phys. Chem. Chem. Phys.*, 2006, **8**, 1057–1065.
- 21 R. Ahlrichs, *Phys. Chem. Chem. Phys.*, 2004, **6**, 5119–5121.
- 22 S. Grimme, J. Antony, S. Ehrlich and H. Krieg, *J. Chem. Phys.*, 2010, **132**, 154104.
- 23 S. Grimme, S. Ehrlich and L. Goerigk, *J. Comput. Chem.*, 2011, **32**, 1456–1465.
- 24 F. Furche and D. Rappoport, in *Computational photochemistry*, ed. M. Olivucci, Elsevier, Amsterdam, Boston, 1st edn., 2005, pp. 93–128.
- 25 F. Neese, F. Wennmohs, U. Becker and C. Riplinger, *J. Chem. Phys.*, 2020, **152**, 224108.
- 26 F. Neese, *WIREs Comput. Mol. Sci.*, 2018, **8**, e1327.
- 27 F. Neese, *WIREs Comput. Mol. Sci.*, 2012, **2**, 73–78.
- 28 F. Weigend, F. Furche and R. Ahlrichs, *J. Chem. Phys.*, 2003, **119**, 12753–12762.

- 29 J. Bohnenberger, W. Feuerstein, D. Himmel, M. Daub, F. Breher and I. Krossing, *Nat. Commun.*, 2019, **10**, 624.
- 30 D. Schwarzenbach, S. C. Abrahams, H. D. Flack, E. Prince and A. J. C. Wilson, *Acta Crystallogr., Sect. A: Found. Crystallogr.*, 1995, **51**, 565–569.
- 31 L. C. Forfar, T. J. Clark, M. Green, S. M. Mansell, C. A. Russell, R. A. Sanguramath and J. M. Slattery, *Chem. Commun.*, 2012, **48**, 1970–1972.
- 32 G. Santiso-Quiñones, A. Reisinger, J. Slattery and I. Krossing, *Chem. Commun.*, 2007, 5046–5048.
- 33 A. Bihlmeier, M. Gonsior, I. Raabe, N. Trapp and I. Krossing, *Chem. Eur. J.*, 2004, **10**, 5041–5051.
- 34 I. Krossing, *J. Am. Chem. Soc.*, 2001, **123**, 4603–4604.
- 35 I. Raabe, S. Antonijevic and I. Krossing, *Chem. Eur. J.*, 2007, **13**, 7510–7522.
- 36 P. Weis, I. M. Riddlestone, H. Scherer and I. Krossing, *Chem. Eur. J.*, 2019, **25**, 12159–12168.
- 37 M. Ligare, *Am. J. Phys.*, 2010, **78**, 815–819.
